# Supplementary material for: Formal (2+2) ring expansion prevails over (4+2) cycloaddition of a kinetically stabilized benzoborirene with reactive cycloaddends
Source: Royal Society of Chemistry journal article supplement (doi:10.1039/d4cc02888k), 2024-01-01
Supplement: d4cc02888k1.pdf [file d4cc02888k1.pdf]

## Electronic Supporting Information

Formal (2 + 2) ring expansion prevails over (4 + 2) cycloaddition of a kinetically stabilized  
benzoborirene with reactive cycloaddends

Marvin Sindlinger,<sup>a</sup> Sonja Biebl,<sup>a</sup> Markus Ströbele,<sup>b</sup> and Holger F. Bettinger<sup>a,\*</sup>

<sup>a</sup> Institut für Organische Chemie, Eberhard Karls Universität Tübingen, Auf der  
Morgenstelle 18, 72076 Tübingen, Germany.

<sup>b</sup> Institut für Anorganische Chemie, Eberhard Karls Universität Tübingen, Auf der  
Morgenstelle 18, 72076 Tübingen, Germany.

holger.bettinger@uni-tuebingen.de

### Table of contents

|                                                                                                                   |    |
|-------------------------------------------------------------------------------------------------------------------|----|
| 1. Experimental Methods                                                                                           | 2  |
| 2. NMR spectra                                                                                                    | 6  |
| 3. Mass spectra                                                                                                   | 11 |
| 4. X-ray crystallography                                                                                          | 12 |
| 5. Computational Methods                                                                                          | 15 |
| 6. Diels-Alder Reactions of <i>B</i> -Phenylbenzoborirene <b>1'</b>                                               | 16 |
| 7. Cartesian coordinates                                                                                          | 19 |
| a. Cartesian coordinates for reactions of <b>1</b> with PTAD and 4,4'-bptz to give products <b>2</b> and <b>3</b> | 19 |
| b. Cartesian coordinates for Diels-Alder reactions of <b>1'</b> with PTAD and 4,4'-bptz                           | 39 |
| 8. References                                                                                                     | 50 |

## 1. Experimental Methods

### General procedures.

All experiments were performed under anhydrous conditions using argon as protective gas. The NMR spectra were recorded with either a *Bruker Avance III HD 300 NanoBay* NMR spectrometer (5 mm BBFO probe head) operating at 96.29 ( $^{11}\text{B}$ ), a *Bruker Avance III HD 400* NMR spectrometer (5 mm BBFO probe head) operating at 400.11 ( $^1\text{H}$ ), 100.62 ( $^{13}\text{C}$ ), 128.39 ( $^{11}\text{B}$ ), a *Bruker Avance III HDX* NMR spectrometer (5 mm BBO probe head ( $^1\text{H}$  coil tunable for  $^{19}\text{F}$ )) operating at 400.11 ( $^1\text{H}$ ), 100.62 ( $^{13}\text{C}$ ), 128.39 ( $^{11}\text{B}$ ) and 161.97 MHz ( $^{31}\text{P}$ ), a *Bruker Avance III HDX 600* spectrometer (5 mm triple resonance probe head) operating at 600.13 ( $^1\text{H}$ ), 150.90 MHz ( $^{13}\text{C}$ ) and 242.94 ( $^{31}\text{P}$ ) and a *Bruker Avance III HDX 700* NMR (5 mm TXI probe head) operating at 700.29 ( $^1\text{H}$ ) and 176.09 MHz ( $^{13}\text{C}$ ). The chemical shifts are reported as  $\delta$  in ppm relative to the following external standards: tetramethylsilane ( $^1\text{H}$ ,  $^{13}\text{C}$ ), boron trifluoride etherate ( $^{11}\text{B}$ ).<sup>1</sup> The chemical shifts were referenced using the chemical shift of the solvent  $^2\text{H}$  resonance frequency as followed:  $\Xi = 32.08397\%$  for  $^{11}\text{B}$ ,  $\Xi = 25.145020\%$  for  $^{13}\text{C}$ .<sup>1</sup> The multiplicity of the signals is abbreviated as s = singlet, d = doublet, t = triplet, q = quartet, sept = septet and m = multiplet or br. = broad/unresolved. The proton and carbon signals were assigned via detailed analysis of  $^1\text{H}$ ,  $^{13}\text{C}\{^1\text{H}\}$ -(UDEFT),  $^1\text{H}$ - $^1\text{H}$ -COSY,  $^1\text{H}$ - $^1\text{H}$ -NOESY,  $^1\text{H}$ - $^{13}\text{C}$ -HSQC and  $^1\text{H}$ - $^{13}\text{C}$ -HMBC NMR spectra. If not stated otherwise, NMR measurements were performed at 298 K. All commercially available compounds were purchased and used without further purification. Dry solvents were either purchased or taken from a *MBraun* solvent purification system MB-SPS-800. For HR-APCI-TOF-MS measurements a *Bruker* maXis 4G spectrometer (sample application: DIP) was used. Benzoborirene **1** was synthesized as described in the literature.<sup>2</sup> The size exclusion chromatography was performed on a LaboACE LC-7080 Plus device using a JAIGEL - 2.5 HR polymer-based GPC HPLC column (exclusion limit  $2 \times 10^4$ , theoretical plates > 28.000) from *Japan Analytical Industry Co.*

## Synthesis.

Compound **2**. To 14.9 mg (0.026 mmol) **1**, dissolved in 6 mL benzene were added 4.6 mg (0.026 mmol) 4-phenyl-1,2,4-triazolin-3,5-dione, dissolved in 6 mL benzene and stirred overnight. The solvent was removed under reduced pressure and the remaining solid was purified by size exclusion chromatography (*n*-hexane/dichloromethane 60/40) to afford **2** as a colorless solid (13.1 mg, 0.018 mmol, 69%). Crystals suitable for X-ray crystallography were grown from a saturated pentane solution at -30 °C.

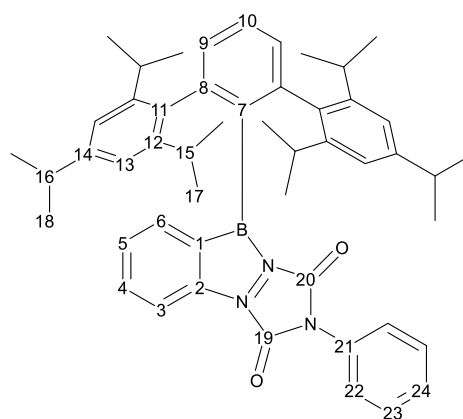

**<sup>1</sup>H (600.13 MHz, benzene-*d*<sub>6</sub>):** δ = 1.04 (d, 6H, **18**, <sup>3</sup>J<sub>HH</sub> = 6.78 Hz), 1.05 (d, 6H, **18**, <sup>3</sup>J<sub>HH</sub> = 6.71 Hz), 1.15 (d, 6H, **17.1**, <sup>3</sup>J<sub>HH</sub> = 6.72 Hz), 1.20 (d, 6H, **17.2**, <sup>3</sup>J<sub>HH</sub> = 6.86 Hz), 1.29 (d, 6H, **17.2**, <sup>3</sup>J<sub>HH</sub> = 6.74 Hz), 1.30 (d, 6H, **17.1**, <sup>3</sup>J<sub>HH</sub> = 6.87 Hz), 2.64 (sept, 2H, **16**, <sup>3</sup>J<sub>HH</sub> = 6.91 Hz), 3.34 (sept, 2H, **15.1**, <sup>3</sup>J<sub>HH</sub> = 6.78 Hz), 3.61 (sept, 2H, **15.2**, <sup>3</sup>J<sub>HH</sub> = 6.71 Hz), 6.77 (dt, 1H, **4**, <sup>3</sup>J<sub>HH</sub> = 7.51 Hz, <sup>4</sup>J<sub>HH</sub> = 0.84 Hz), 6.88-6.91 (m, 1H, **5**), 6.95-6.97 (m, 1H, **24**), 7.02 (s, 2H, **13.1**), 7.07 (s, 2H, **13.2**), 7.11-7.14 (m, 2H, **23**), 7.33-7.36 (m, 1H, **10**), 7.36-7.37 (m, 1H, **3**), 7.39 (m, 2H, **9**), 7.61 (m, 2H, **22**), 7.67 (m, 1H, **6**) ppm;

**<sup>13</sup>C{<sup>1</sup>H} (150.90 MHz, benzene-*d*<sub>6</sub>):** δ = 22.9 (**17.1**), 23.8 (**17.2**), 24.0 (**18**), 24.2 (**18**), 26.8 (**17.1**), 27.1 (**17.2**), 30.7 (**15.2**), 30.8 (**15.1**), 34.6 (**16**), 112.2 (**3**), 120.6 (**13.1**), 121.2 (**13.2**), 122.7 (**4**), 125.7 (**22**), 127.9 (**10**), 128.4 (**24**), 129.2 (**23**), 130.0 (**9**), 131.9 (**21**), 133.5 (**5**), 134.7 (**6**), 134.9 (**7**), 138.0 (**11**), 141.4 (**1**), 143.9 (**20**), 144.5 (**8**), 147.0 (**12.1**), 147.2 (**19**), 148.2 (**12.2**), 148.7 (**14**), ppm;

**<sup>11</sup>B (128.39 MHz, benzene-*d*<sub>6</sub>):** δ = 40.8 ppm;

**HR-APCI-TOF-MS:** APCI T<sub>Oven</sub> = 350 °C, calc. for C<sub>50</sub>H<sub>59</sub>BN<sub>3</sub>O<sub>2</sub> + H 744.47033 Da, found 744.47099 Da [M+H]<sup>•+</sup>.

Compound **3**. To 20.0 mg (0.035 mmol) **1**, dissolved in 8 mL benzene were added 8.3 mg (0.035 mmol) 3,5-di-(4-pyridinyl)-1,2,4,5-tetrazine dissolved in 8 mL benzene and stirred overnight. The solvent was removed under reduced pressure and the remaining solid was dissolved in pentane. Slow evaporation of the solvent yielded red crystals suitable for X-ray crystallography.

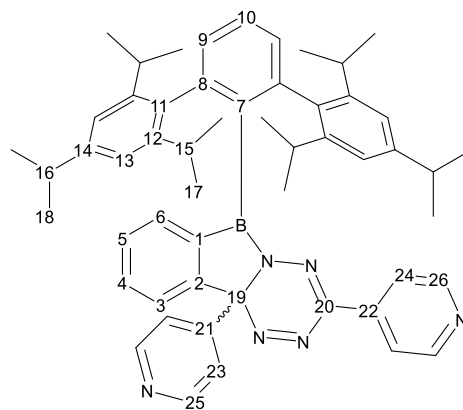

**<sup>1</sup>H (700.29 MHz, benzene-d<sub>6</sub>):** δ = 0.92 (d, 3H, **17.1**,

<sup>3</sup>J<sub>HH</sub> = 6.78 Hz), 0.98 (d, 3H, **17.2**, <sup>3</sup>J<sub>HH</sub> = 6.82 Hz), 1.04 (d, 3H, **17.3**, <sup>3</sup>J<sub>HH</sub> = 6.79 Hz), 1.07 (d, 3H, **17.2**), 1.08 (d, 3H, **18.1**), 1.09 (d, 3H, **17.4**), 1.13 (d, 6H, **17.1+18.2**), 1.15 (d, 3H, **17.4**, <sup>3</sup>J<sub>HH</sub> = 6.80 Hz), 1.17 (d, 6H, **17.3+18.3**), 1.20 (d, 3H, **18.4**, <sup>3</sup>J<sub>HH</sub> = 6.92 Hz), 2.69 (sept, 1H, **16**, <sup>3</sup>J<sub>HH</sub> = 6.84 Hz), 2.70 (sept, 1H, **16**, <sup>3</sup>J<sub>HH</sub> = 6.84 Hz), 2.93 (sept, 1H, **15.2**, <sup>3</sup>J<sub>HH</sub> = 6.74 Hz), 3.02 (sept, 1H, **15.1**, <sup>3</sup>J<sub>HH</sub> = 6.74 Hz), 3.37 (sept, 1H, **15.3**, <sup>3</sup>J<sub>HH</sub> = 6.69 Hz), 3.72 (sept, 1H, **15.4**, <sup>3</sup>J<sub>HH</sub> = 6.77 Hz), 6.37 (m, 1H, **23.1**), 6.85 (d, 1H, **24.1**, <sup>4</sup>J<sub>HH</sub> = 1.40 Hz), 6.92-6.95 (m, 2H, **4+26.1**), 6.98 (dt, 1H, **5**, <sup>3</sup>J<sub>HH</sub> = 7.40 Hz, <sup>4</sup>J<sub>HH</sub> = 0.86 Hz), 7.02 (d, 1H, **24.2**, <sup>4</sup>J<sub>HH</sub> = 1.62 Hz), 7.16 (s, 4H, **13**), 7.19 (d, 1H, **26.2**, <sup>4</sup>J<sub>HH</sub> = 1.52 Hz), 7.25 (m, 1H, **3**), 7.34 (t, 1H, **10**, <sup>3</sup>J<sub>HH</sub> = 7.59 Hz), 7.38 (dd, 1H, **9**, <sup>3</sup>J<sub>HH</sub> = 7.55 Hz, <sup>4</sup>J<sub>HH</sub> = 1.04 Hz), 7.41 (dd, 1H, **9**, <sup>3</sup>J<sub>HH</sub> = 7.57 Hz, <sup>4</sup>J<sub>HH</sub> = 0.93 Hz), 7.61 (d, 1H, **6**, <sup>3</sup>J<sub>HH</sub> = 7.34 Hz), 7.68 (m, 1H, **23.2**), 8.29 (d, 1H, **25.1**, <sup>3</sup>J<sub>HH</sub> = 5.73 Hz), 7.34 (d, 1H, **25.2**, <sup>3</sup>J<sub>HH</sub> = 4.77 Hz) ppm (coupling constants not determinable due to signal overlap have been omitted );

**<sup>13</sup>C{<sup>1</sup>H} (176.09 MHz, benzene-d<sub>6</sub>):** δ = 21.8 (**17.1**), 22.4 (**17.2**), 23.1 (**17.3**), 23.4 (**17.4**), 23.9 (**18.1**), 24.0 (**18.3**), 24.5 (**18.2**), 24.5 (**18.4**), 26.6 (**17.4**), 27.1 (**17.3**), 27.1 (**17.2**), 27.4 (**17.1**), 30.7 (**15.4**), 31.0 (**15.3**), 31.0 (**15.2**), 31.3 (**15.1**), 34.5 (**16**), 34.7 (**16**), 84.1 (**19**), 120.3 (**26.1**), 120.6 (**24.1**), 120.7 (**23.2**), 121.1 (**24.2**), 121.4 (**26.2**), 121.9 (**23.1**), 123.5 (**3**), 127.8 (**10**), 128.3 (**5**), 128.6 (**13**), 129.9 (**9**), 130.1 (**9**), 133.6 (**4**), 134.6 (**6**), 136.9 (**11**), 137.5 (**1**), 138.2 (**11**), 143.2 (**8**), 144.6 (**8**), 145.0 (**20 o. 22**), 146.0 (**12.1**), 147.1 (**12.3**), 147.7 (**12.2**), 148.1 (**12.4**), 148.9 (**14**), 149.2 (**14**), 150.1 (**2**), 150.5 (**25.1**), 150.8 (**25.2**), 153.9 (**21**) ppm;

**<sup>11</sup>B (128.39 MHz, benzene-d<sub>6</sub>):** no signal could be obtained;

**HR-APCI-TOF-MS:** APCI T<sub>Oven</sub> = 350 °C, calc. for C<sub>54</sub>H<sub>62</sub>BN<sub>6</sub> + H 805.51325 Da, found 805.51233 Da [M+H]<sup>+</sup>.

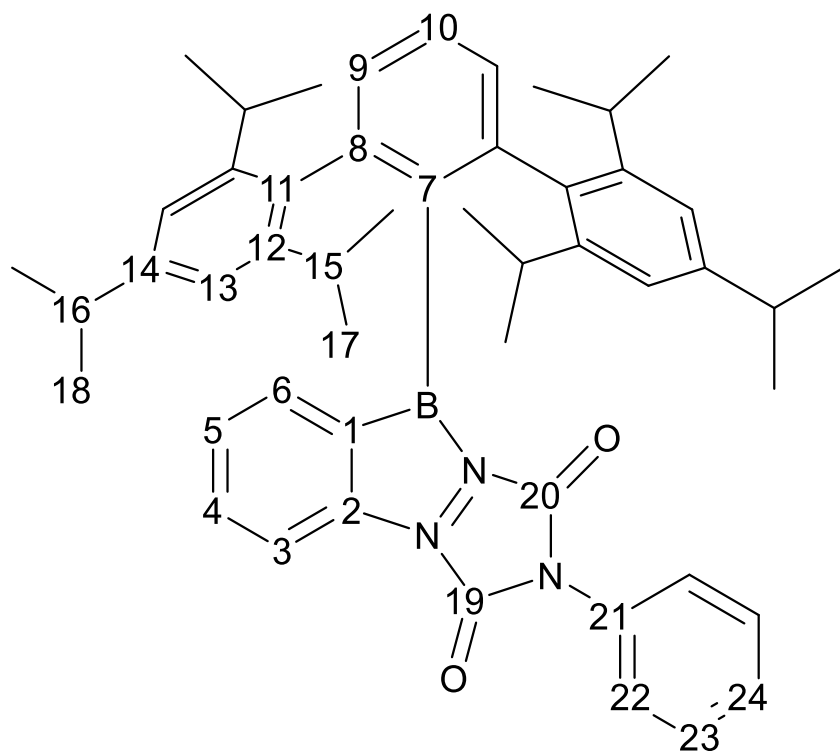

**2**

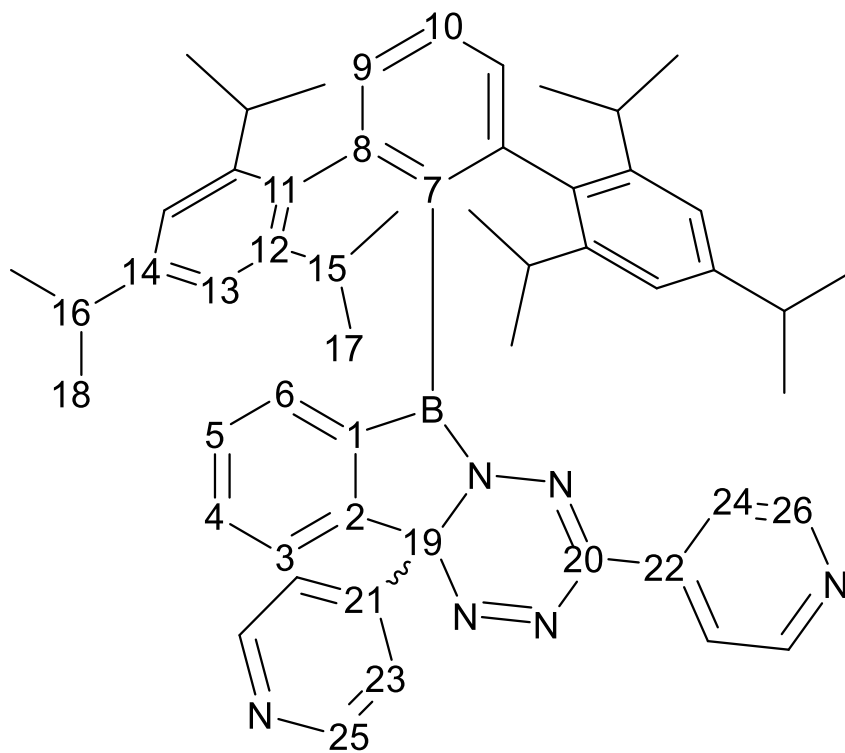

**3**

**Scheme S1.** Atom numbering of compounds **2** and **3** used for NMR assignment.

## 2. NMR spectra

Solvent signals are denoted by an asterisk (\*)

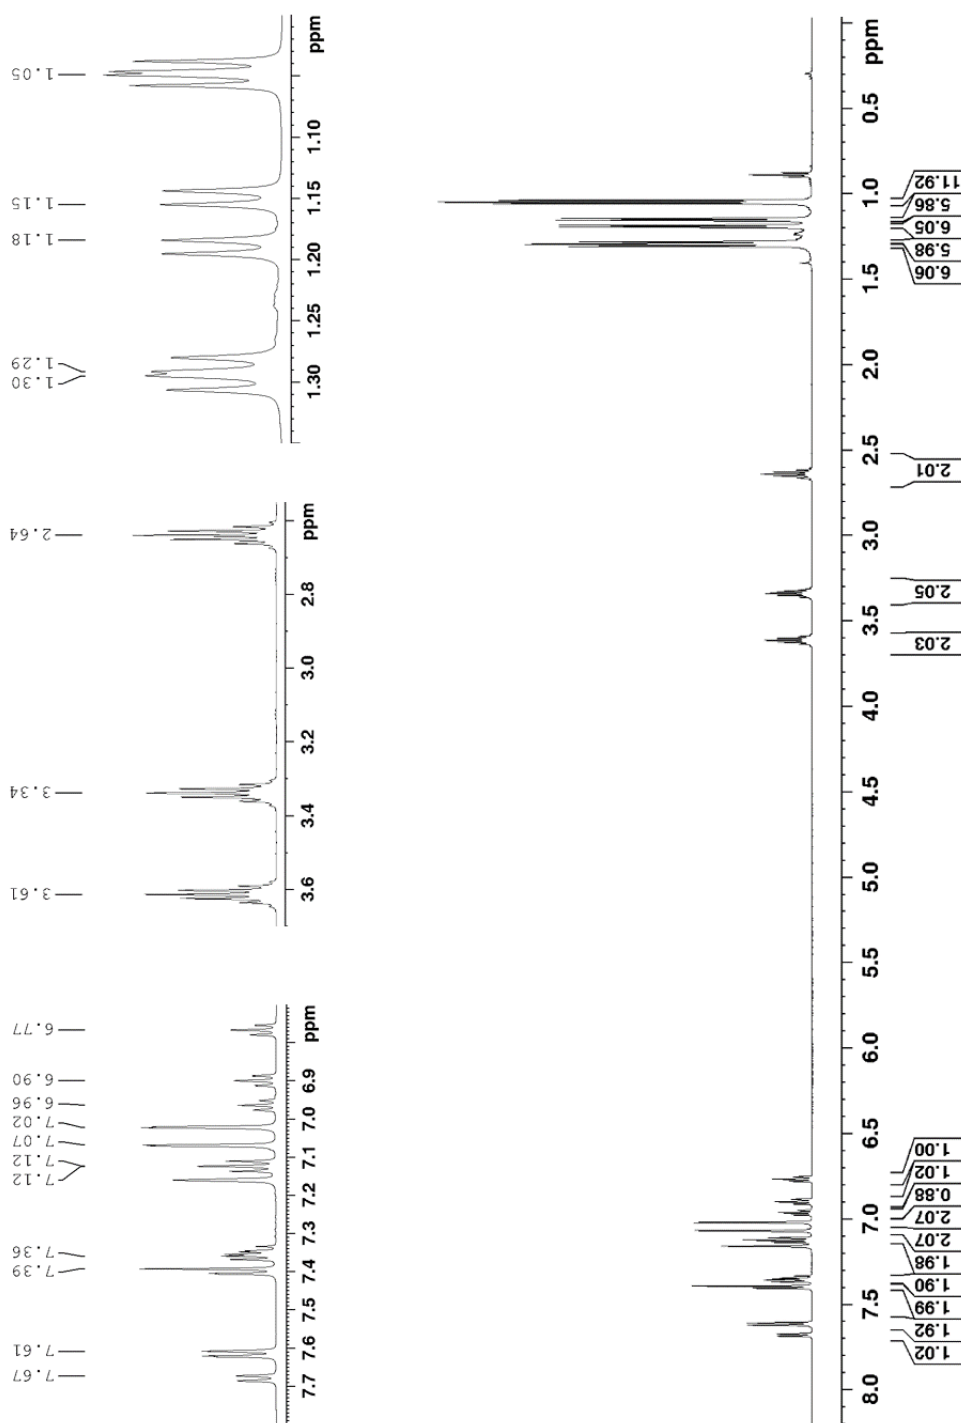

**Figure S1.**  $^1\text{H}$  NMR spectrum of compound **2** in  $\text{C}_6\text{D}_6$ .

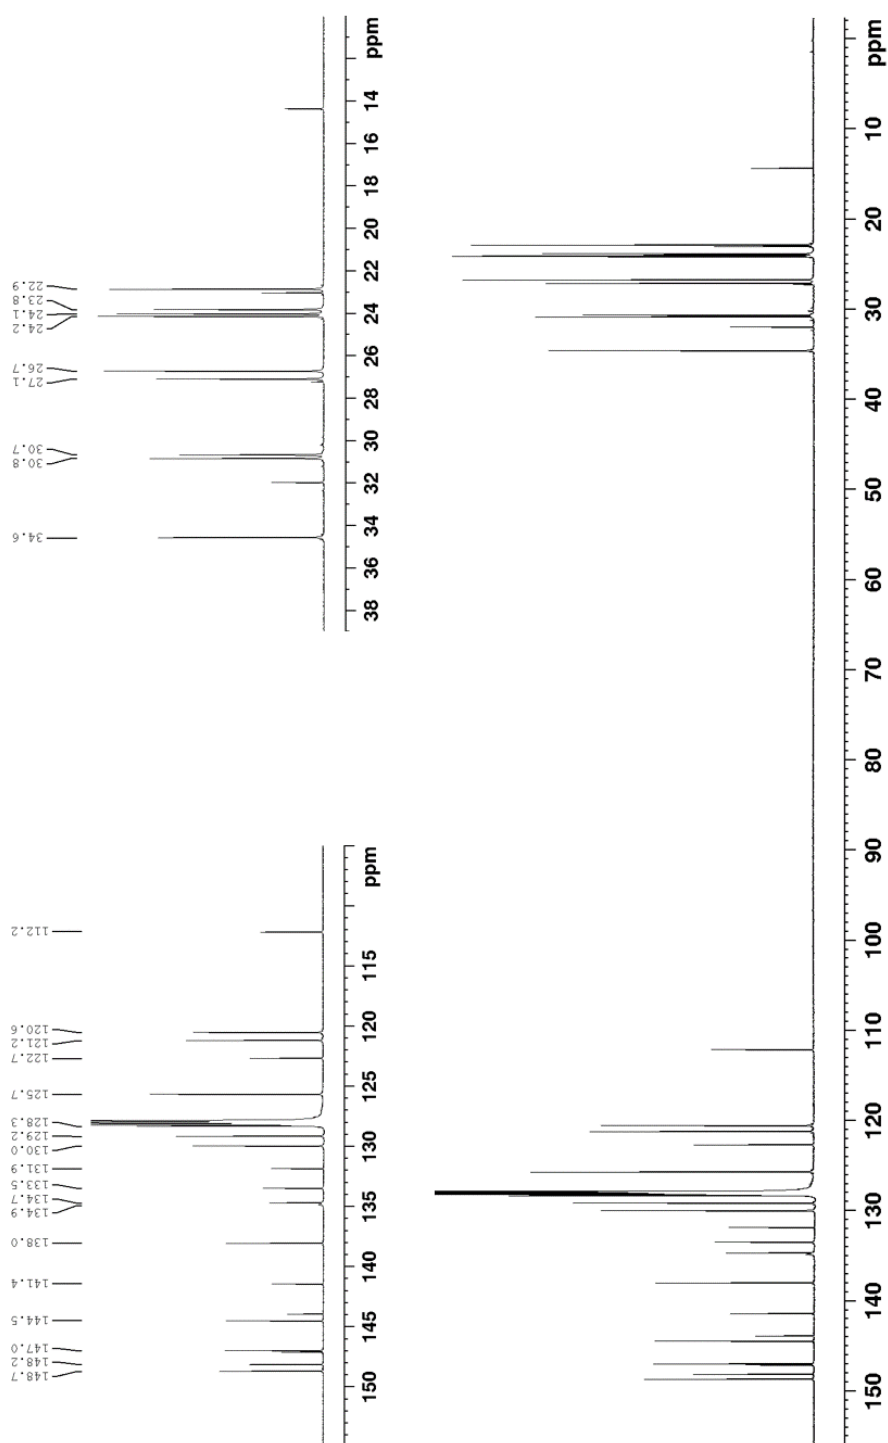

**Figure S2.**  $^{13}\text{C}\{^1\text{H}\}$  NMR spectrum of compound **2** in  $\text{C}_6\text{D}_6$ .

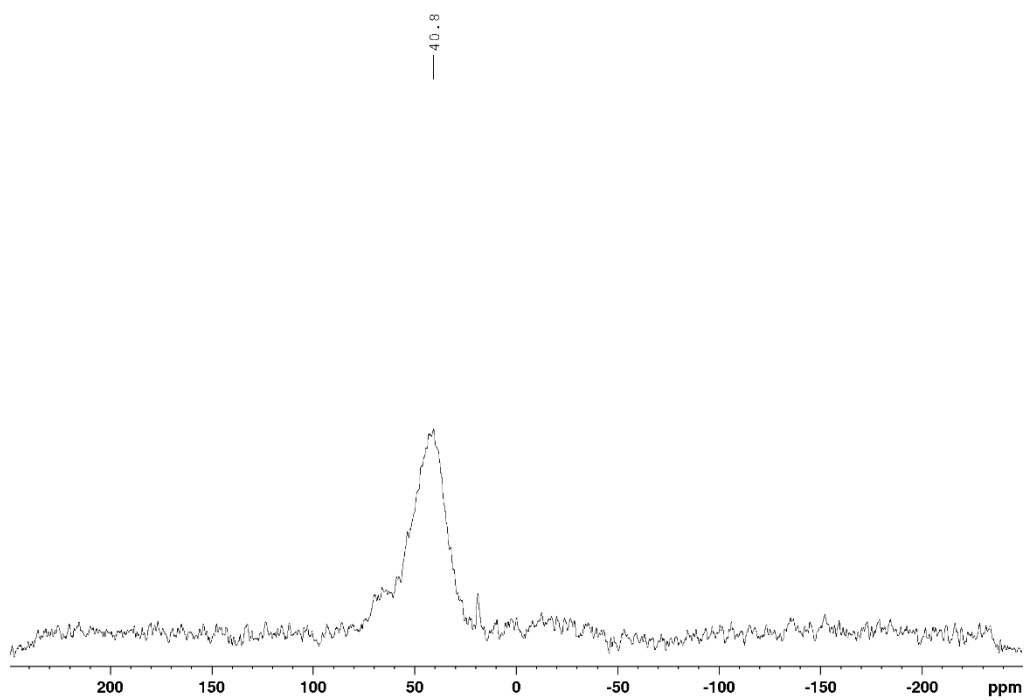

**Figure S3.**  $^{11}\text{B}$  NMR spectrum of compound **2** in  $\text{C}_6\text{D}_6$ .



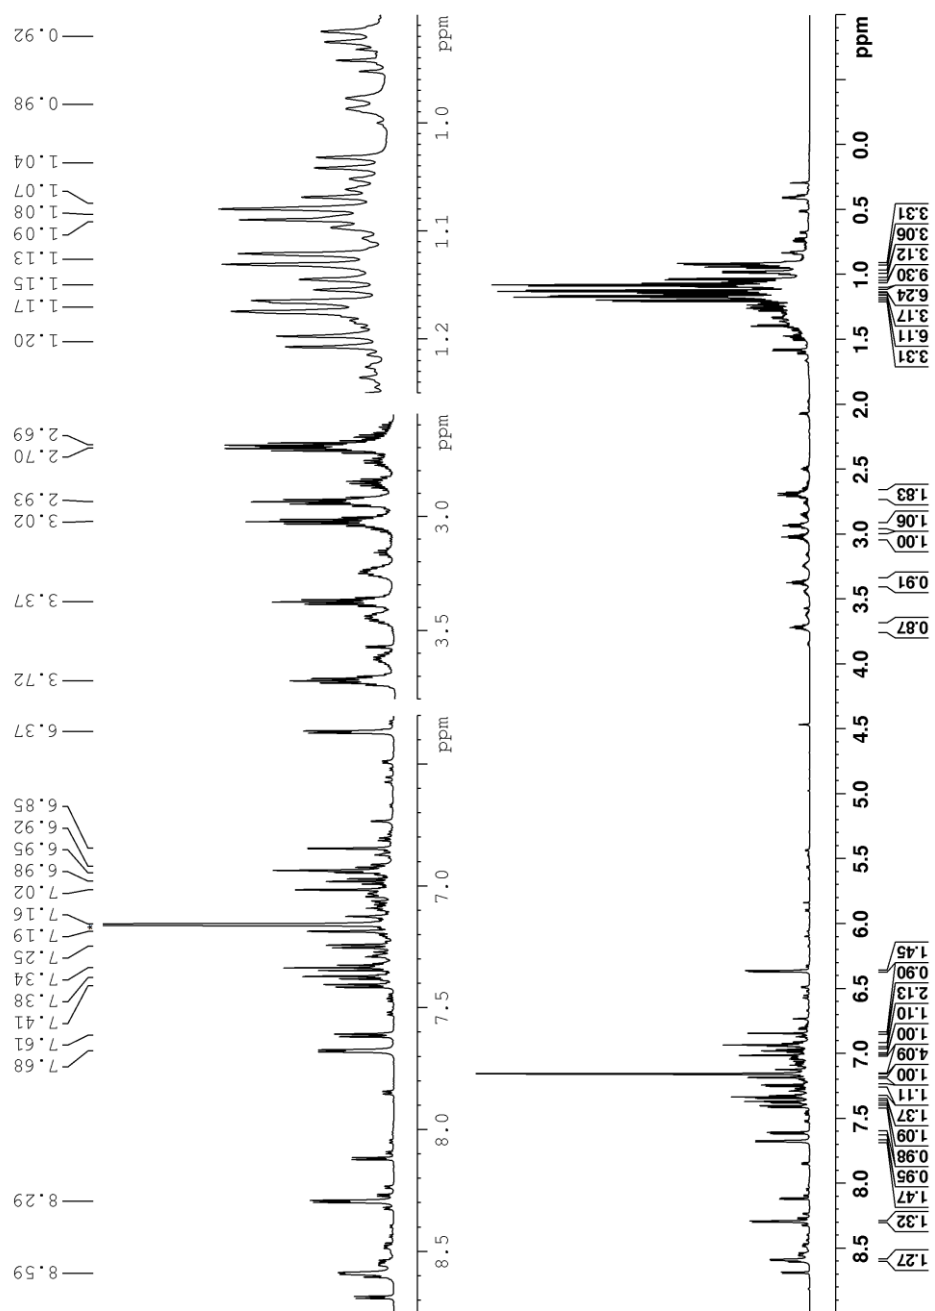

**Figure S4.**  $^1\text{H}$  NMR spectrum of compound **3** in  $\text{C}_6\text{D}_6$ .

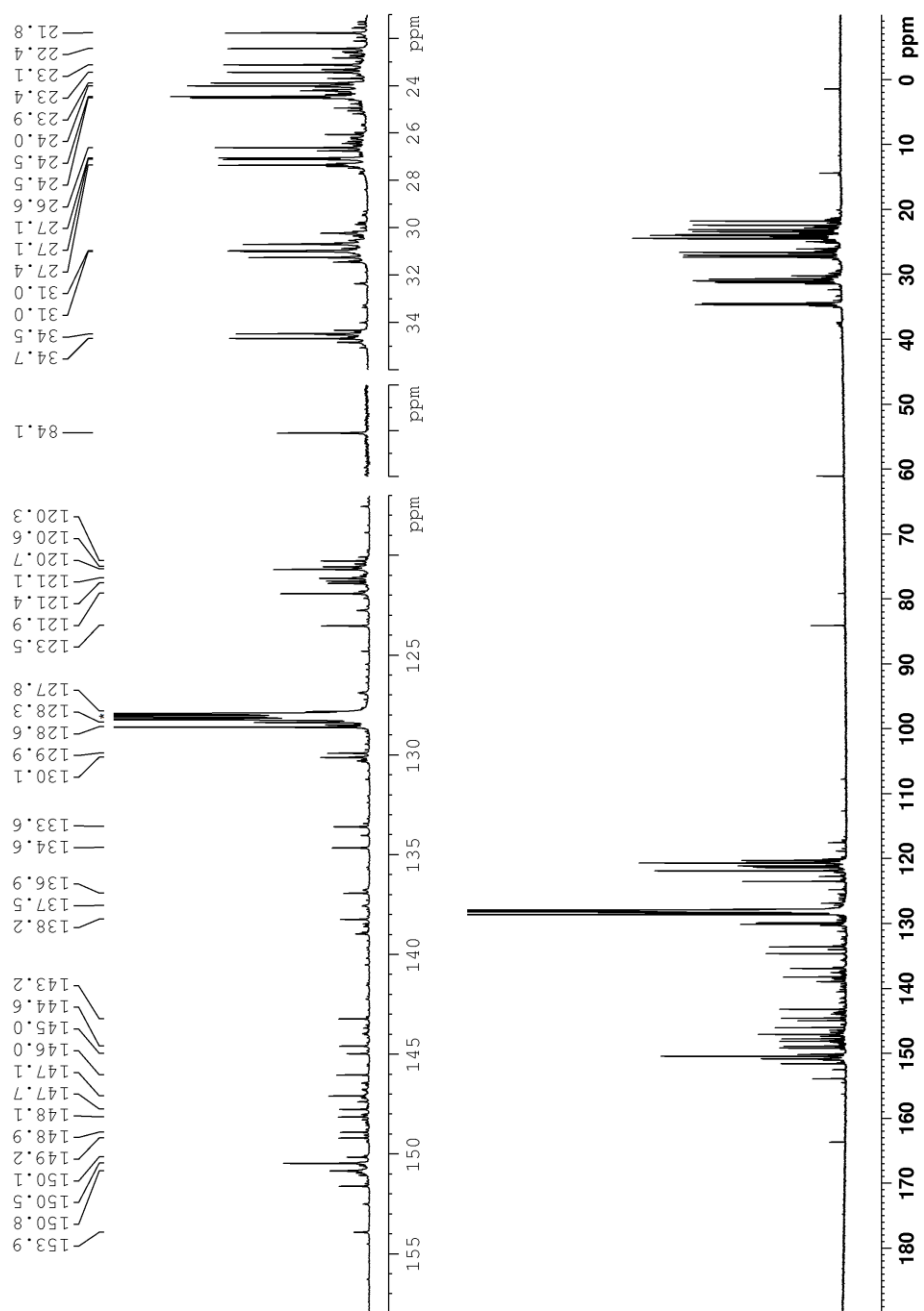

**Figure S5.**  $^{13}\text{C}\{^1\text{H}\}$  NMR spectrum of compound **3** in  $\text{C}_6\text{D}_6$ .

### 3. Mass spectra

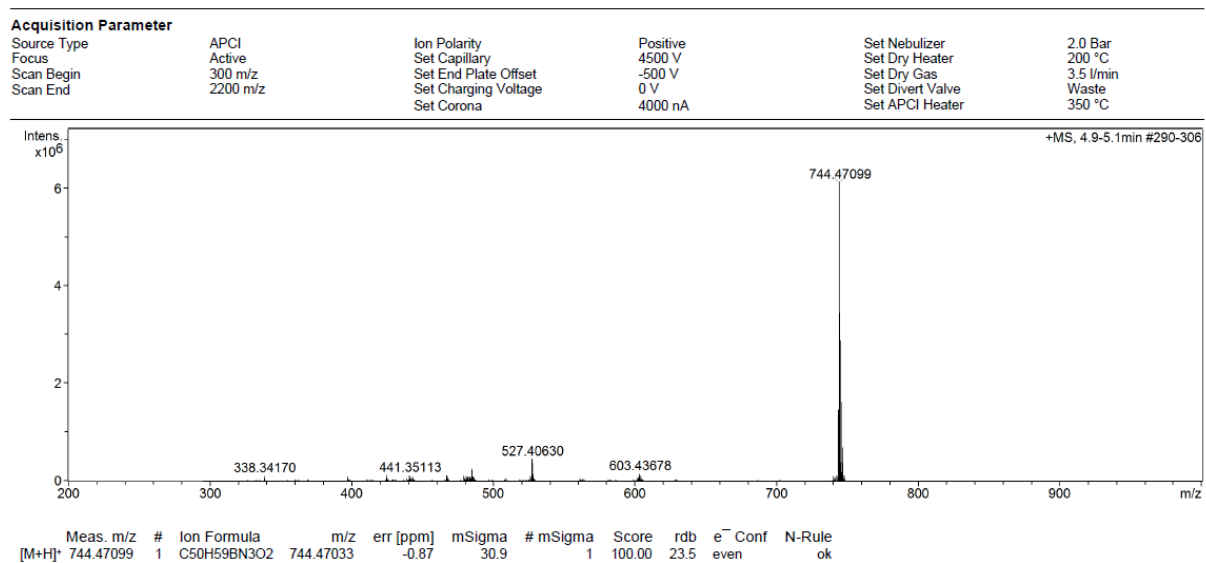

Figure S6. Mass spectrum of compound 2.

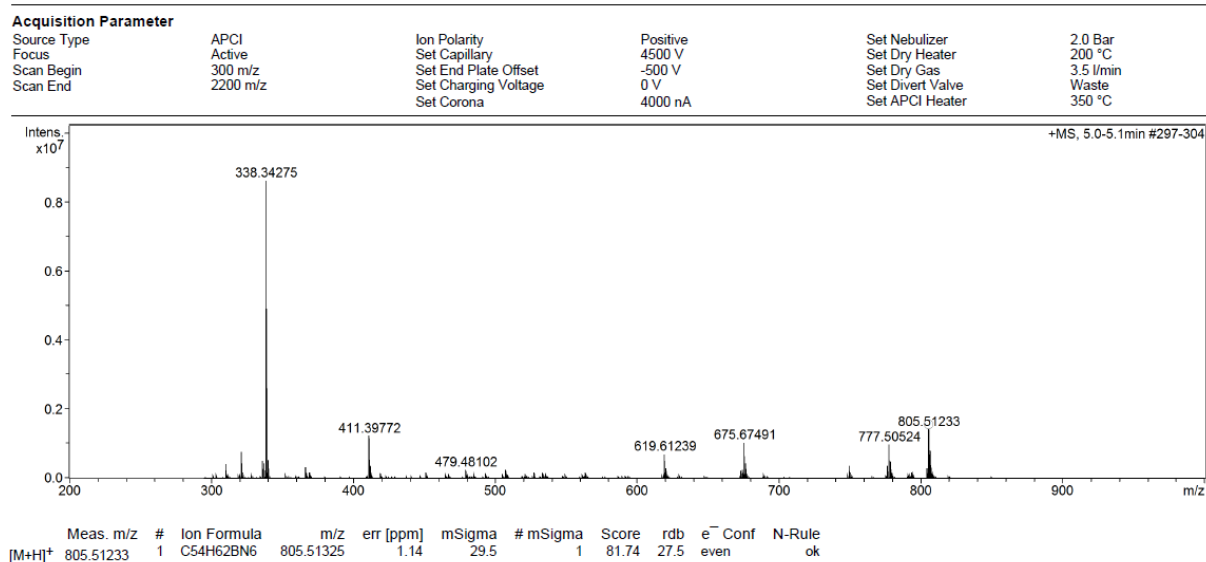

Figure S7. Mass spectrum of compound 3.

#### 4. X-ray crystallography

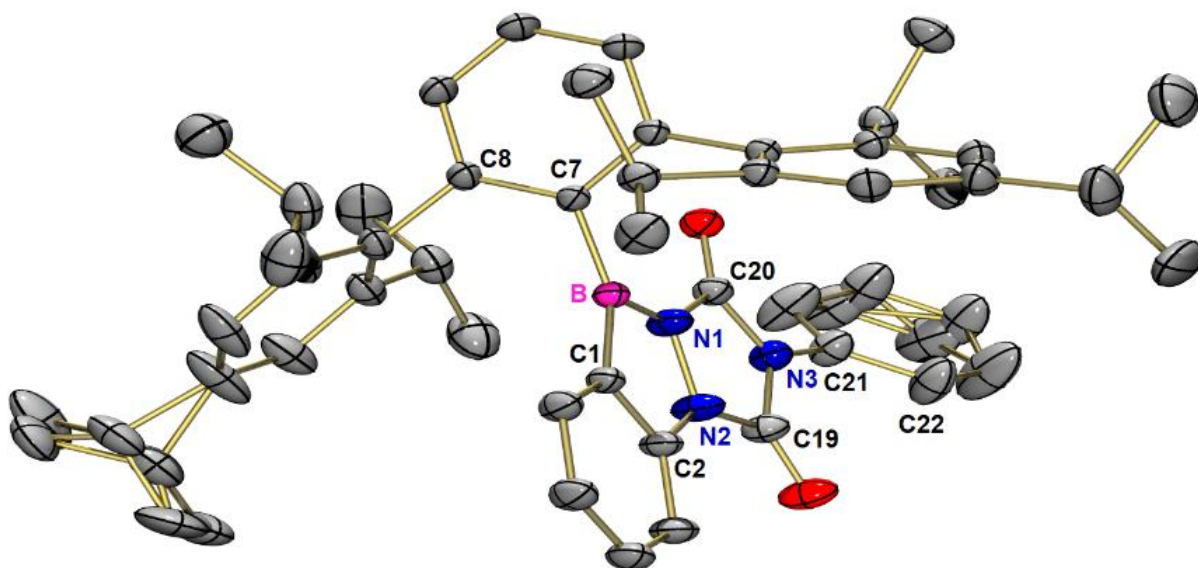

**Figure S8.** Molecular structure of **2** in the solid state. Thermal ellipsoids are shown at the 50% probability level. Hydrogen atoms have been omitted for clarity. Selected distances [pm] and angles [°]: B–C1 155.4, B–C7 157.0, B–N1 144.8, N1–N2 139.4, N2–C2 138.8, C2–N2–N3 173.84, N1–B–C7–C8 91.74, C19–N3–C21–C22 -41.30. Angle sums [°]: B 360.00, N1 359.81, N2 359.09, C1 359.97, C2 360.00, C19 360.00, C20 360.00, N3 359.86.



**Table S1.** Crystallographic information for compounds **2** and **3**.

|                                              | <b>2</b>                                                       | <b>3</b>                                        |
|----------------------------------------------|----------------------------------------------------------------|-------------------------------------------------|
| Empirical formula                            | C <sub>50</sub> H <sub>58</sub> BN <sub>3</sub> O <sub>2</sub> | C <sub>54</sub> H <sub>61</sub> BN <sub>6</sub> |
| Formula weight                               | 743.861                                                        | 804.89                                          |
| Temperature [K]                              | 149.99(10)                                                     | 150.00(11)                                      |
| Crystal system                               | triclinic                                                      | monoclinic                                      |
| Space group                                  | P -1                                                           | Cc                                              |
| Unit cell dimensions                         | a = 12.3228(3) Å                                               | a = 11.08430(10) Å                              |
|                                              | b = 14.4609(3) Å                                               | b = 33.8144(2) Å                                |
|                                              | c = 14.8882(3) Å                                               | c = 25.41950(10) Å                              |
|                                              | $\alpha = 69.651(2)^\circ$                                     | $\alpha = 90^\circ$                             |
|                                              | $\beta = 88.327(2)^\circ$                                      | $\beta = 93.8470(10)^\circ$                     |
|                                              | $\gamma = 69.674(2)^\circ$                                     | $\gamma = 90^\circ$                             |
| Volume [Å <sup>3</sup> ]                     | 3219.9(1)                                                      | 9505.99(11)                                     |
| Z                                            | 2                                                              | 8                                               |
| Density (calculated)<br>[Mg/m <sup>3</sup> ] | 1.065                                                          | 1.125                                           |
| Crystal size [mm <sup>3</sup> ]              | 0.14×0.13×0.02                                                 | 0.21×0.12×0.03                                  |
| Crystal Color                                | colorless                                                      | red                                             |
| Theta range for data<br>collection           | 3.18° - 78.68°                                                 | 2.613° - 68.250°                                |
| Index ranges                                 | -15 ≤ h ≤ 15,<br>-18 ≤ k ≤ 17,<br>-18 ≤ l ≤ 18                 | -13 ≤ h ≤ 13,<br>-40 ≤ k ≤ 40,<br>-30 ≤ l ≤ 30  |
| Reflections collected                        | 75181                                                          | 135487                                          |
| Independent<br>reflections                   | 9378 [R(int) = 0.0180]                                         | 17102 [R(int) = 0.0229]                         |
| Goodness-of-fit on<br>F <sub>2</sub>         | 1.0735                                                         | 1.021                                           |
| Final R Indices<br>[I > 2σ(I)]               | R1 = 0.0215, wR2 = 0.0524                                      | R1 = 0.0329, wR2 = 0.0893                       |
| R Indices (all Data)                         | R1 = 0.0244, wR2 = 0.0538                                      | R1 = 0.0334, wR2 = 0.0897                       |
| CCDC                                         | 2290575                                                        | 2312526                                         |

## Experimental Data

Crystals suitable for X-Ray crystallography were grown as described in the synthesis. Single crystals were selected, coated with Parabar 10312 (previously known as Paratone N, Hampton Research) and fixed on a microloop. Data were collected on a Rigaku XtaLAP Synergy-S single-crystal diffractometer, equipped with a HyPix-6000HE detector and monochromatic Cu- $K_{\alpha}$  radiation. Corrections for absorption effects were applied with CrysAlisPro 1.171.41.65a (Rigaku Oxford Diffraction, 2020). The structure was solved by direct methods (SHELXS),<sup>3</sup> and full-matrix least-squares structure refinements were performed with SHELXL-2014<sup>4</sup> implemented in Olex2 1.3-ac4.<sup>5</sup>

## 5. Computational Methods

The reactions of **1** with PTAD and 4,4'-bptz towards products **2** and **3**, respectively, were investigated using the r<sup>2</sup>SCAN-3c methodology.<sup>6</sup> This “swiss army knife” composite method introduced by Grimme et al. combines the meta-generalized gradient approximation functional r<sup>2</sup>SCAN<sup>7</sup> with a tailor-made triple- $\zeta$  basis (mTZVPP) set and corrections for dispersion interactions by the D4 method and for basis set superposition errors by the geometrical counterpoise correction scheme (gCP).<sup>6</sup> Geometries were optimized using r<sup>2</sup>SCAN-3c and harmonic vibrational frequencies were computed to confirm the nature of stationary points as minimum or transition structures with 0 or 1 imaginary vibrational frequencies, respectively. The searches for transition structures at the r<sup>2</sup>SCAN-3c level of theory were facilitated by preliminary semiempirical GFN-xTB<sup>8</sup> computations using either classical coordinate scans or the climbing-image nudged elastic band method combined with a saddle point search using an eigenvector following method starting from the location of the climbing image (NEB-TS) as implemented by Ásgeirsson et al. in ORCA.<sup>9</sup> All these computations were performed with ORCA 5.0.4.<sup>10, 11</sup>

For the investigation of the Diels-Alder reactivity of **1** towards PTAD and 4,4'-bptz a simplified model system was employed that has the bulky Trip<sub>2</sub>C<sub>6</sub>H<sub>3</sub> (Trip = 2,4,6-*iso*-Pr<sub>3</sub>C<sub>6</sub>H<sub>2</sub>) substituent replaced by a phenyl ring giving **1'**. This simplification is motivated by the desire to investigate the inherent reactivity of **1'** in Diels-Alder reactions unbiased by steric effects. The geometries of stationary points were fully optimized using the M06-2X functional along with the 6-311+G\*\* basis set.<sup>12, 13</sup> Harmonic vibrational frequencies were computed to confirm that the structures correspond to minima or transition states with zero or one imaginary vibrational frequencies, respectively. These computations were performed with Gaussian 16.<sup>14</sup>

Energies were refined by computed single point energies at the  $r^2$ SCAN-3c and M06-2X/6-311+G\*\* geometries using the revDSD-PBEP86-D4<sup>15</sup> double hybrid functional along with the def2-QZVPP and appropriate fitting basis sets (def2-QZVPP/C and def2-JK) for the RI approximations.<sup>16-18</sup> The influence of benzene solvent was taken into account using the conductor-like polarizable continuum model (CPCM) as implemented in Orca.<sup>19</sup> The revDSD-PBEP86-D4 electronic energy, the Gibbs free energy correction obtained from harmonic vibrational frequencies computed at the  $r^2$ SCAN-3c or M06-2X/6-311+G\*\* give the Gibbs energies at  $T = 298.15$  K.<sup>20</sup> The correction of the standard state in solution compared to gas phase was considered by adding 1.89 kcal/mol for each species.<sup>21</sup> The  $r^2$ SCAN-3c and revDSD-PBEP86-D4 computations were performed with ORCA 5.0.4.<sup>10, 11</sup>

## 6. Diels-Alder Reactions of *B*-Phenylbenzoborirene **1'**

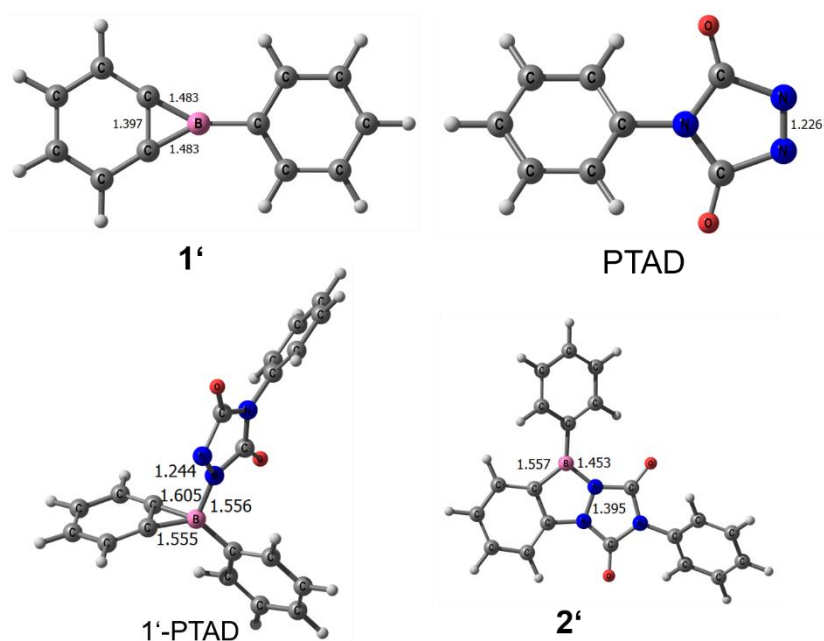

**Figure S10.** Structures of **1'**, PTAD, the complex between **1'** and PTAD, and reaction product **2'** as computed at the M06-2X/6-311+G\*\* level of theory. Important distances are given in Å.



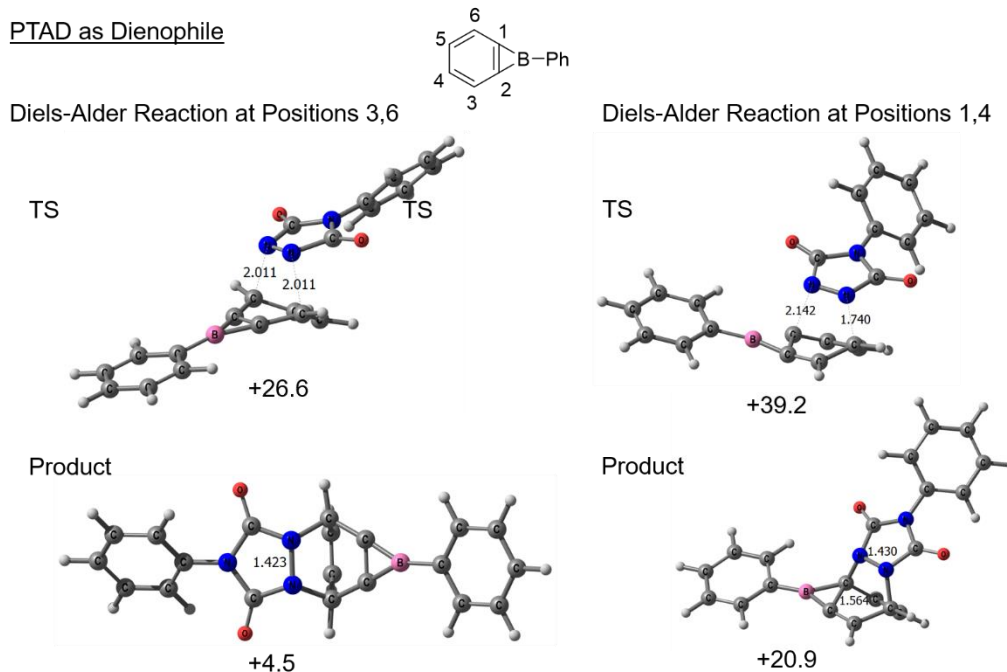

**Figure S11.** Structures of transition states (TS) and products of Diels-Alder reactions between **1'** and PTAD as computed at the M06-2X/6-311+G\*\* level of theory. Important distances are given in Å, relative Gibbs free energies are given in kcal/mol and were computed at the revDSD-PBEP86-D4/def2-QZVPP(PCM:benzene)//M06-2X/6-311+G\*\* level of theory.

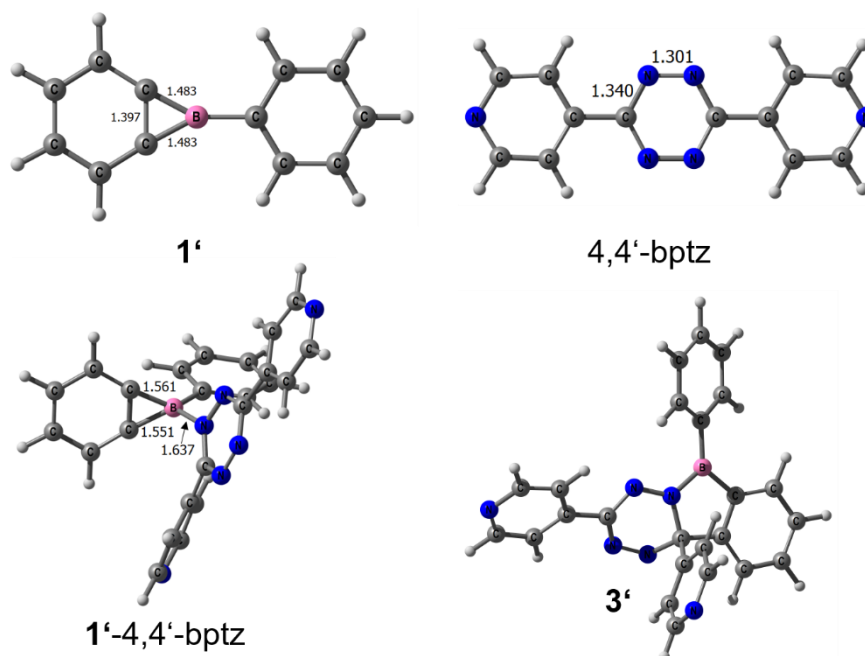

**Figure S12.** Structures of **1'**, 4,4'-bptz, the complex between **1'** and 4,4'-bptz, and reaction product **3'** as computed at the M06-2X/6-311+G\*\* level of theory. Important distances are given in Å.

Tetrazine as Diene

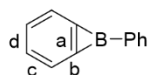

Diels-Alder Reaction at Bond a

Diels-Alder Reaction at Bond b

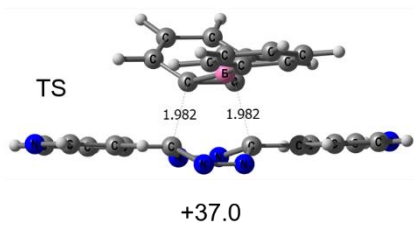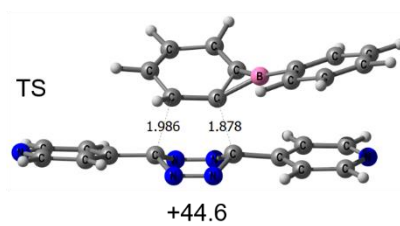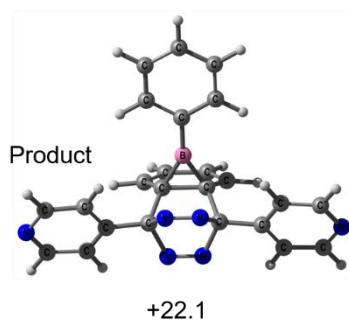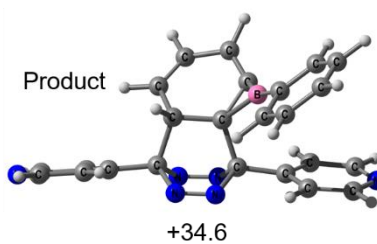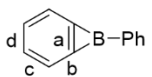

Diels-Alder Reaction at Bond c

Diels-Alder Reaction at Bond d

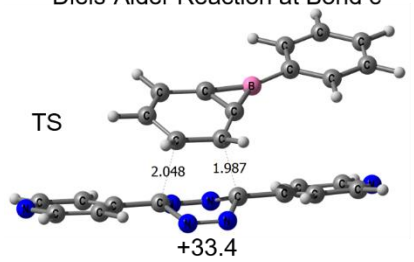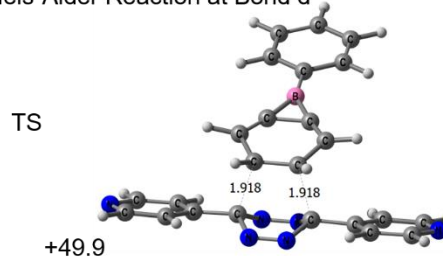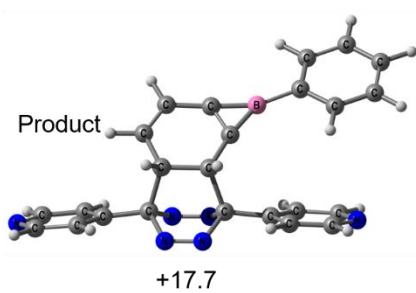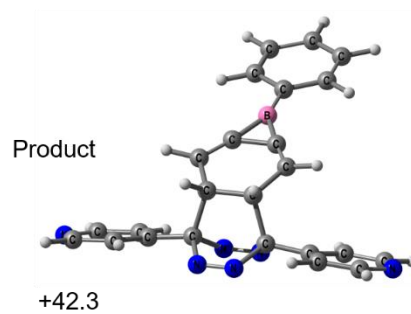

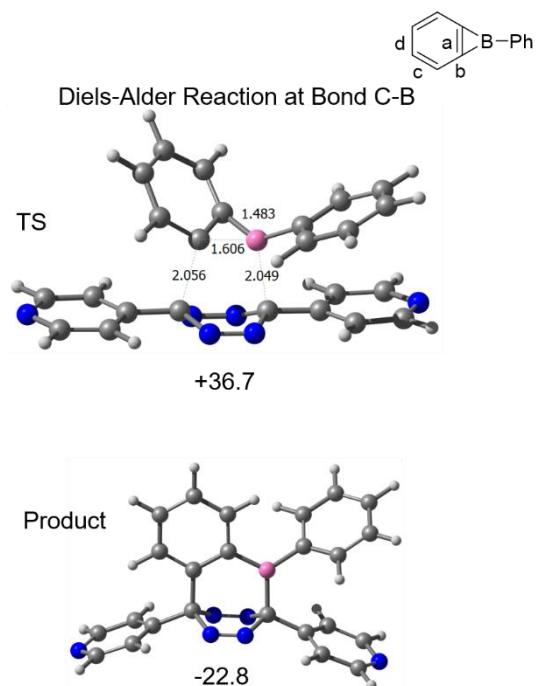

**Figure S13.** Structures of transition states (TS) and products of Diels-Alder reactions between **1'** and 4,4'-bptz as computed at the M06-2X/6-311+G\*\* level of theory. Important distances are given in Å, and relative Gibbs free energies are given in kcal/mol and were computed at the revDSD-PBEP86-D4/def2-QZVPP(PCM:benzene)//M06-2X/6-311+G\*\* level of theory.

## 7. Cartesian coordinates

### a. Cartesian coordinates for reactions of **1** with PTAD and 4,4'-bptz to give products **2** and **3**

```

1'
96
symmetry c1
6      7.714350000      18.841061000      4.078671000
6      8.159838000      17.622602000      4.638893000
6      9.080174000      17.630948000      5.685402000
1      9.415892000      16.686313000      6.105551000
6      9.562740000      18.836210000      6.185565000
1      10.280651000     18.834300000      7.001667000
6      7.644513000      16.323739000      4.111709000
6      6.478493000      15.763370000      4.655426000
6      5.997390000      14.564527000      4.126235000
1      5.093424000      14.122471000      4.541498000
6      6.635308000      13.916421000      3.073672000
6      7.787971000      14.495694000      2.545691000
1      8.298498000      14.007057000      1.718459000
6      8.305618000      15.688485000      3.046048000
6      5.718424000      16.439948000      5.782195000
1      6.249429000      17.364273000      6.037483000
6      4.301055000      16.830174000      5.341801000
1      4.329136000      17.446749000      4.437808000
1      3.795905000      17.396238000      6.132605000
1      3.695162000      15.942988000      5.125501000
6      5.684678000      15.564849000      7.041924000

```

|   |              |              |              |
|---|--------------|--------------|--------------|
| 1 | 5.138615000  | 14.632007000 | 6.862040000  |
| 1 | 5.185785000  | 16.092233000 | 7.862809000  |
| 1 | 6.697487000  | 15.302895000 | 7.365321000  |
| 6 | 6.086075000  | 12.619314000 | 2.515037000  |
| 1 | 5.196525000  | 12.362270000 | 3.107352000  |
| 6 | 5.645287000  | 12.779316000 | 1.054071000  |
| 1 | 4.904025000  | 13.578747000 | 0.952733000  |
| 1 | 5.202797000  | 11.850079000 | 0.677776000  |
| 1 | 6.498062000  | 13.028603000 | 0.412672000  |
| 6 | 7.093075000  | 11.470876000 | 2.659157000  |
| 1 | 7.988348000  | 11.656081000 | 2.055120000  |
| 1 | 6.653064000  | 10.525447000 | 2.322589000  |
| 1 | 7.409718000  | 11.354745000 | 3.700421000  |
| 6 | 9.555095000  | 16.282289000 | 2.419481000  |
| 1 | 9.787982000  | 17.211493000 | 2.952231000  |
| 6 | 10.760048000 | 15.345865000 | 2.578195000  |
| 1 | 10.933756000 | 15.105147000 | 3.632212000  |
| 1 | 11.666192000 | 15.813578000 | 2.176953000  |
| 1 | 10.603084000 | 14.403777000 | 2.040998000  |
| 6 | 9.326546000  | 16.643516000 | 0.945569000  |
| 1 | 9.144082000  | 15.747376000 | 0.341340000  |
| 1 | 10.206849000 | 17.150657000 | 0.534510000  |
| 1 | 8.461398000  | 17.304788000 | 0.832343000  |
| 6 | 5.931729000  | 19.537688000 | 1.863910000  |
| 6 | 5.229290000  | 20.279473000 | 0.907180000  |
| 1 | 5.296640000  | 21.362938000 | 0.833080000  |
| 6 | 4.434804000  | 19.544168000 | 0.045109000  |
| 1 | 3.860005000  | 20.053377000 | -0.725042000 |
| 6 | 4.340371000  | 18.130125000 | 0.125897000  |
| 1 | 3.697765000  | 17.617524000 | -0.586231000 |
| 6 | 5.036996000  | 17.398749000 | 1.071873000  |
| 1 | 4.960172000  | 16.314590000 | 1.121614000  |
| 6 | 5.838561000  | 18.144644000 | 1.943551000  |
| 5 | 6.719035000  | 18.842452000 | 2.908089000  |
| 6 | 8.206800000  | 20.057241000 | 4.603279000  |
| 6 | 9.127282000  | 20.044083000 | 5.649602000  |
| 1 | 9.497505000  | 20.987042000 | 6.043759000  |
| 6 | 7.725785000  | 21.358941000 | 4.051802000  |
| 6 | 6.572488000  | 21.953947000 | 4.585859000  |
| 6 | 6.118657000  | 23.154883000 | 4.037755000  |
| 1 | 5.223884000  | 23.622713000 | 4.444389000  |
| 6 | 6.772520000  | 23.772786000 | 2.977040000  |
| 6 | 7.912668000  | 23.159984000 | 2.459583000  |
| 1 | 8.435031000  | 23.624729000 | 1.626045000  |
| 6 | 8.402009000  | 21.962560000 | 2.977417000  |
| 6 | 5.795321000  | 21.312172000 | 5.722120000  |
| 1 | 6.315737000  | 20.390494000 | 6.006596000  |
| 6 | 4.380173000  | 20.921817000 | 5.274501000  |
| 1 | 4.413901000  | 20.273199000 | 4.393182000  |
| 1 | 3.856978000  | 20.389020000 | 6.076580000  |
| 1 | 3.788365000  | 21.807311000 | 5.016526000  |
| 6 | 5.754597000  | 22.218198000 | 6.959363000  |
| 1 | 5.215926000  | 23.149788000 | 6.752875000  |
| 1 | 5.244897000  | 21.713632000 | 7.787868000  |
| 1 | 6.765893000  | 22.481832000 | 7.286098000  |
| 6 | 6.248577000  | 25.069522000 | 2.393656000  |
| 1 | 5.379142000  | 25.367293000 | 2.996524000  |
| 6 | 5.771347000  | 24.877232000 | 0.947862000  |
| 1 | 5.000265000  | 24.101926000 | 0.890193000  |
| 1 | 5.353837000  | 25.808377000 | 0.548396000  |
| 1 | 6.601278000  | 24.575242000 | 0.298858000  |
| 6 | 7.287756000  | 26.194141000 | 2.482392000  |
| 1 | 8.163385000  | 25.971579000 | 1.862309000  |
| 1 | 6.863435000  | 27.141331000 | 2.131065000  |
| 1 | 7.632591000  | 26.329756000 | 3.512288000  |
| 6 | 9.636053000  | 21.329675000 | 2.359225000  |
| 1 | 9.838561000  | 20.395378000 | 2.895742000  |
| 6 | 10.867602000 | 22.230154000 | 2.521828000  |
| 1 | 11.043778000 | 22.467419000 | 3.576237000  |
| 1 | 11.761318000 | 21.735061000 | 2.125502000  |
| 1 | 10.741141000 | 23.175726000 | 1.982586000  |
| 6 | 9.404628000  | 20.970031000 | 0.885355000  |
| 1 | 9.249808000  | 21.868461000 | 0.276754000  |
| 1 | 10.272763000 | 20.437885000 | 0.480043000  |
| 1 | 8.522259000  | 20.332113000 | 0.771339000  |

```

symmetry c1
N      0.442177000    -0.544092000    0.464622000
N      0.742586000    -0.659939000    1.655070000
C     -0.919651000    -1.150659000    0.219412000
C     -0.368352000    -1.366711000    2.396434000
N     -1.346719000    -1.633122000    1.448704000
O     -0.342932000    -1.615196000    3.564698000
O     -1.461186000    -1.175005000   -0.845227000
C     -2.588460000    -2.292465000    1.698098000
C     -2.608431000    -3.425120000    2.507145000
C     -3.754242000    -1.789544000    1.127135000
C     -4.957448000    -2.440930000    1.370244000
H     -3.718801000    -0.908256000    0.496460000
C     -3.822025000    -4.057248000    2.749364000
H     -1.690751000    -3.800466000    2.946132000
C     -4.995559000    -3.570819000    2.181447000
H     -5.869941000    -2.056822000    0.925055000
H     -3.845872000    -4.938639000    3.382582000
H     -5.939571000    -4.072185000    2.371202000

```

Complex between 1 and PTAD, **1-PTAD**

114

```

symmetry c1
C      1.993757000    -2.162573000    -2.283028000
C      1.588980000    -1.063989000    -1.550117000
C      0.836814000    -0.043313000    -1.991528000
C      0.460237000     0.046155000    -3.327624000
C      0.829589000    -1.040546000    -4.122761000
C      1.577084000    -2.115549000    -3.617686000
H      2.601961000    -2.975870000    -1.899446000
H     -0.111446000     0.874866000    -3.736514000
H      0.531641000    -1.059244000    -5.168276000
H      1.850182000    -2.929589000    -4.285159000
B      1.252341000     0.199001000    -0.492562000
N      0.369750000    -0.474949000     0.521332000
N      0.668523000    -0.603711000     1.762356000
C     -0.944943000    -1.134431000     0.201359000
C     -0.340980000    -1.384597000     2.378813000
N     -1.313156000    -1.689498000     1.401292000
O     -0.350087000    -1.725278000     3.534766000
O     -1.507813000    -1.131175000    -0.854025000
C     -2.558079000    -2.333942000     1.653557000
C     -2.595867000    -3.442541000     2.495325000
C     -3.721663000    -1.825509000     1.079826000
C     -4.936412000    -2.438088000     1.359982000
H     -3.672363000    -0.963572000     0.424487000
C     -3.821325000    -4.036330000     2.774149000
H     -1.681766000    -3.821786000     2.936608000
C     -4.991612000    -3.539204000     2.209467000
H     -5.845601000    -2.046046000     0.914333000
H     -3.856870000    -4.896613000     3.435452000
H     -5.944915000    -4.009948000     2.429498000
C      2.194426000     1.375656000    -0.003357000
C      1.646452000     2.471565000     0.710959000
C      3.556756000     1.438399000    -0.371457000
C      2.409615000     3.615559000     0.941476000
C      4.313904000     2.575447000    -0.078752000
C      3.739282000     3.673951000     0.544506000
H      1.959503000     4.454719000     1.464377000
H      5.368743000     2.584586000    -0.337244000
H      4.333095000     4.560665000     0.748254000
C      4.251561000     0.289994000    -1.024433000
C      4.542385000    -0.871398000    -0.279897000
C      4.668294000     0.383861000    -2.369450000
C      5.240384000    -1.911544000    -0.895257000
C      5.349371000    -0.686676000    -2.941802000
C      5.646176000    -1.843592000    -2.223148000
H      5.478508000    -2.805556000    -0.322129000
H      5.654091000    -0.616877000    -3.983016000
C      0.284462000     2.354631000     1.316468000
C     -0.871421000     2.369408000     0.511982000
C      0.175912000     2.088791000     2.696940000
C     -2.098670000     2.023400000     1.084956000
C     -1.079118000     1.774726000     3.229961000
C     -2.220811000     1.705841000     2.437702000
H     -2.993204000     2.012631000     0.466783000
H     -1.154442000     1.556008000     4.290820000
C      4.388019000     1.613037000    -3.218993000

```

|   |              |              |              |
|---|--------------|--------------|--------------|
| H | 3.661314000  | 2.232714000  | -2.680711000 |
| C | 3.774562000  | 1.257385000  | -4.579880000 |
| C | 5.665627000  | 2.441437000  | -3.424687000 |
| H | 6.102898000  | 2.758894000  | -2.473872000 |
| H | 6.420674000  | 1.851535000  | -3.957482000 |
| H | 5.452344000  | 3.336739000  | -4.019792000 |
| H | 4.501748000  | 0.763441000  | -5.234261000 |
| H | 3.443545000  | 2.168416000  | -5.091128000 |
| H | 2.915356000  | 0.592846000  | -4.462158000 |
| C | 4.169341000  | -1.006483000 | 1.186004000  |
| H | 3.493868000  | -0.185930000 | 1.444545000  |
| C | 5.415966000  | -0.871058000 | 2.072282000  |
| C | 3.425170000  | -2.313870000 | 1.480649000  |
| H | 2.568140000  | -2.431002000 | 0.807686000  |
| H | 4.071918000  | -3.190196000 | 1.358761000  |
| H | 3.055094000  | -2.312912000 | 2.511662000  |
| H | 6.136306000  | -1.670014000 | 1.861264000  |
| H | 5.141291000  | -0.929531000 | 3.131678000  |
| H | 5.916673000  | 0.087351000  | 1.898727000  |
| C | 6.377034000  | -2.999006000 | -2.874895000 |
| H | 6.537622000  | -3.761479000 | -2.099535000 |
| C | 7.752181000  | -2.576087000 | -3.407160000 |
| C | 5.530115000  | -3.630563000 | -3.988496000 |
| H | 4.561616000  | -3.965508000 | -3.602957000 |
| H | 5.338611000  | -2.907496000 | -4.789300000 |
| H | 6.044887000  | -4.492928000 | -4.426898000 |
| H | 7.654085000  | -1.842466000 | -4.214999000 |
| H | 8.293837000  | -3.440686000 | -3.806742000 |
| H | 8.357610000  | -2.123771000 | -2.615414000 |
| C | -3.583279000 | 1.386114000  | 3.021212000  |
| H | -4.201568000 | 0.996638000  | 2.199230000  |
| C | -4.246282000 | 2.674297000  | 3.535518000  |
| C | -3.547664000 | 0.323856000  | 4.123251000  |
| H | -3.013280000 | -0.576451000 | 3.805426000  |
| H | -3.060969000 | 0.701349000  | 5.029146000  |
| H | -4.567495000 | 0.034226000  | 4.397774000  |
| H | -3.651227000 | 3.106090000  | 4.348638000  |
| H | -5.251518000 | 2.467947000  | 3.920105000  |
| H | -4.324697000 | 3.424737000  | 2.742317000  |
| C | 1.370050000  | 2.177475000  | 3.634255000  |
| H | 2.278993000  | 2.139353000  | 3.024575000  |
| C | 1.459969000  | 1.040943000  | 4.658279000  |
| C | 1.340150000  | 3.531472000  | 4.364709000  |
| H | 1.297856000  | 4.371437000  | 3.665107000  |
| H | 0.456940000  | 3.594411000  | 5.011632000  |
| H | 2.230491000  | 3.648868000  | 4.992764000  |
| H | 0.632887000  | 1.065404000  | 5.376498000  |
| H | 2.387282000  | 1.145487000  | 5.232457000  |
| H | 1.459158000  | 0.061844000  | 4.176235000  |
| C | -0.796849000 | 2.853734000  | -0.925524000 |
| H | 0.161472000  | 2.521740000  | -1.342139000 |
| C | -0.792888000 | 4.392786000  | -0.931742000 |
| C | -1.909933000 | 2.322250000  | -1.829547000 |
| H | -1.967034000 | 1.229648000  | -1.801092000 |
| H | -2.888142000 | 2.733177000  | -1.554342000 |
| H | -1.719827000 | 2.629432000  | -2.863584000 |
| H | -1.724620000 | 4.779443000  | -0.502439000 |
| H | -0.703038000 | 4.770778000  | -1.956490000 |
| H | 0.042502000  | 4.788001000  | -0.346158000 |

**TS1** for insertion of N into the B-C bond

114

symmetry c1

|   |              |              |              |
|---|--------------|--------------|--------------|
| C | 0.412652000  | -2.735752000 | -2.134176000 |
| C | 0.033048000  | -1.595039000 | -1.465951000 |
| C | -0.335742000 | -0.401280000 | -1.982985000 |
| C | -0.378041000 | -0.255567000 | -3.369532000 |
| C | -0.114759000 | -1.398106000 | -4.119667000 |
| C | 0.278508000  | -2.604614000 | -3.521322000 |
| H | 0.746265000  | -3.655867000 | -1.667494000 |
| H | -0.619150000 | 0.691404000  | -3.844735000 |
| H | -0.189941000 | -1.357565000 | -5.202856000 |
| H | 0.487528000  | -3.466738000 | -4.150309000 |
| B | -0.047835000 | 0.095574000  | -0.558033000 |
| N | -0.765434000 | -0.803517000 | 0.386392000  |
| N | -0.398388000 | -1.006060000 | 1.628563000  |
| C | -2.151518000 | -1.355198000 | 0.122698000  |
| C | -1.375041000 | -1.775848000 | 2.234385000  |

|   |              |              |              |
|---|--------------|--------------|--------------|
| N | -2.437936000 | -1.994208000 | 1.289875000  |
| O | -1.373109000 | -2.185240000 | 3.372650000  |
| O | -2.807484000 | -1.189163000 | -0.867862000 |
| C | -3.683323000 | -2.612411000 | 1.591667000  |
| C | -3.703364000 | -3.747678000 | 2.400222000  |
| C | -4.867410000 | -2.067933000 | 1.095846000  |
| C | -6.077947000 | -2.668492000 | 1.418421000  |
| H | -4.836767000 | -1.187365000 | 0.465794000  |
| C | -4.924095000 | -4.328943000 | 2.722020000  |
| H | -2.776273000 | -4.155205000 | 2.784398000  |
| C | -6.112767000 | -3.795265000 | 2.233940000  |
| H | -7.000430000 | -2.245033000 | 1.032268000  |
| H | -4.941449000 | -5.209174000 | 3.357548000  |
| H | -7.062504000 | -4.256597000 | 2.487226000  |
| C | 0.936626000  | 1.209172000  | -0.067904000 |
| C | 0.402124000  | 2.268163000  | 0.700923000  |
| C | 2.298584000  | 1.240002000  | -0.430453000 |
| C | 1.200883000  | 3.366827000  | 1.017289000  |
| C | 3.090946000  | 2.318963000  | -0.034363000 |
| C | 2.541047000  | 3.392165000  | 0.655169000  |
| H | 0.770833000  | 4.190705000  | 1.579117000  |
| H | 4.152344000  | 2.303524000  | -0.262113000 |
| H | 3.164447000  | 4.237476000  | 0.933190000  |
| C | 2.943115000  | 0.100321000  | -1.152797000 |
| C | 3.256569000  | -1.076302000 | -0.444908000 |
| C | 3.280046000  | 0.211647000  | -2.518460000 |
| C | 3.901221000  | -2.115938000 | -1.117067000 |
| C | 3.908725000  | -0.860894000 | -3.148418000 |
| C | 4.231177000  | -2.031314000 | -2.464546000 |
| H | 4.160473000  | -3.021000000 | -0.572224000 |
| H | 4.154408000  | -0.778983000 | -4.203716000 |
| C | -0.991417000 | 2.151289000  | 1.227803000  |
| C | -2.097578000 | 2.205431000  | 0.352370000  |
| C | -1.188360000 | 1.876489000  | 2.597506000  |
| C | -3.364636000 | 1.902092000  | 0.849642000  |
| C | -2.479095000 | 1.595125000  | 3.048808000  |
| C | -3.573183000 | 1.575210000  | 2.189910000  |
| H | -4.220604000 | 1.919818000  | 0.179204000  |
| H | -2.622975000 | 1.362471000  | 4.099287000  |
| C | 3.008169000  | 1.483461000  | -3.307650000 |
| H | 2.210840000  | 2.032030000  | -2.788987000 |
| C | 2.546025000  | 1.220901000  | -4.747460000 |
| C | 4.257976000  | 2.378874000  | -3.346205000 |
| H | 4.587381000  | 2.667561000  | -2.346005000 |
| H | 5.084199000  | 1.846727000  | -3.832044000 |
| H | 4.057735000  | 3.293186000  | -3.916542000 |
| H | 3.373993000  | 0.879602000  | -5.378865000 |
| H | 2.165523000  | 2.147195000  | -5.191601000 |
| H | 1.758599000  | 0.465295000  | -4.786368000 |
| C | 2.987367000  | -1.208672000 | 1.044414000  |
| H | 2.234527000  | -0.467202000 | 1.328143000  |
| C | 4.265964000  | -0.891135000 | 1.835106000  |
| C | 2.431830000  | -2.580319000 | 1.438569000  |
| H | 1.564305000  | -2.845983000 | 0.824048000  |
| H | 3.180756000  | -3.373961000 | 1.336608000  |
| H | 2.103533000  | -2.562191000 | 2.482614000  |
| H | 5.061612000  | -1.604096000 | 1.587998000  |
| H | 4.074816000  | -0.948102000 | 2.912662000  |
| H | 4.629996000  | 0.115229000  | 1.602867000  |
| C | 4.897746000  | -3.195065000 | -3.169978000 |
| H | 5.180670000  | -3.921896000 | -2.395567000 |
| C | 6.174474000  | -2.777735000 | -3.908576000 |
| C | 3.914573000  | -3.887943000 | -4.123791000 |
| H | 3.028147000  | -4.234432000 | -3.582538000 |
| H | 3.579809000  | -3.195125000 | -4.904862000 |
| H | 4.383051000  | -4.750681000 | -4.610936000 |
| H | 5.950239000  | -2.100655000 | -4.740252000 |
| H | 6.680772000  | -3.655258000 | -4.325523000 |
| H | 6.868860000  | -2.265088000 | -3.235540000 |
| C | -4.978159000 | 1.286593000  | 2.682922000  |
| H | -5.526625000 | 0.838024000  | 1.841518000  |
| C | -5.685768000 | 2.601790000  | 3.048044000  |
| C | -5.032936000 | 0.303385000  | 3.854394000  |
| H | -4.458696000 | -0.605796000 | 3.650195000  |
| H | -4.641437000 | 0.754109000  | 4.773235000  |
| H | -6.070089000 | 0.012352000  | 4.051575000  |
| H | -5.161054000 | 3.097787000  | 3.872938000  |
| H | -6.718433000 | 2.413763000  | 3.363383000  |

|   |              |              |              |
|---|--------------|--------------|--------------|
| H | -5.702493000 | 3.292141000  | 2.198531000  |
| C | -0.051082000 | 1.925199000  | 3.606100000  |
| H | 0.893262000  | 1.869987000  | 3.053803000  |
| C | -0.050797000 | 0.773087000  | 4.615876000  |
| C | -0.092293000 | 3.269230000  | 4.354615000  |
| H | -0.088609000 | 4.121459000  | 3.668372000  |
| H | -1.004556000 | 3.337902000  | 4.959130000  |
| H | 0.768233000  | 3.361846000  | 5.026945000  |
| H | -0.919646000 | 0.808212000  | 5.282500000  |
| H | 0.841207000  | 0.846615000  | 5.248259000  |
| H | -0.042932000 | -0.199323000 | 4.121058000  |
| C | -1.931072000 | 2.708531000  | -1.074126000 |
| H | -0.939758000 | 2.404937000  | -1.432416000 |
| C | -1.949006000 | 4.247087000  | -1.063264000 |
| C | -2.968180000 | 2.167755000  | -2.060248000 |
| H | -3.024512000 | 1.075632000  | -2.028372000 |
| H | -3.966341000 | 2.572817000  | -1.859174000 |
| H | -2.702556000 | 2.473076000  | -3.078379000 |
| H | -2.913300000 | 4.613405000  | -0.692288000 |
| H | -1.797077000 | 4.641290000  | -2.074711000 |
| H | -1.161789000 | 4.647010000  | -0.416401000 |

Intermediate **INT1**

114

symmetry c1

|   |              |              |              |
|---|--------------|--------------|--------------|
| C | 1.074092000  | -3.753225000 | 0.046921000  |
| C | 1.180681000  | -2.380995000 | -0.050104000 |
| C | 2.015339000  | -1.666821000 | -0.896534000 |
| C | 2.774265000  | -2.380773000 | -1.833611000 |
| C | 2.657287000  | -3.763678000 | -1.819813000 |
| C | 1.841791000  | -4.438467000 | -0.891196000 |
| H | 0.444483000  | -4.250482000 | 0.776790000  |
| H | 3.437418000  | -1.886710000 | -2.535137000 |
| H | 3.229506000  | -4.353064000 | -2.530411000 |
| H | 1.806900000  | -5.524063000 | -0.913481000 |
| B | 1.698172000  | -0.408286000 | -0.072028000 |
| N | 0.531735000  | -1.268078000 | 0.671848000  |
| N | 0.513345000  | -1.426106000 | 2.089298000  |
| C | -0.895546000 | -1.141006000 | 0.148036000  |
| C | -0.773969000 | -1.539802000 | 2.442176000  |
| N | -1.641876000 | -1.402456000 | 1.227605000  |
| O | -1.264773000 | -1.723579000 | 3.539913000  |
| O | -1.133163000 | -0.928164000 | -1.015305000 |
| C | -3.052703000 | -1.549095000 | 1.216470000  |
| C | -3.651032000 | -2.478807000 | 2.069931000  |
| C | -3.832252000 | -0.785074000 | 0.347366000  |
| C | -5.212910000 | -0.942111000 | 0.348482000  |
| H | -3.358536000 | -0.076906000 | -0.319993000 |
| C | -5.033667000 | -2.616356000 | 2.063939000  |
| H | -3.038022000 | -3.062732000 | 2.744582000  |
| C | -5.820737000 | -1.849685000 | 1.209912000  |
| H | -5.815542000 | -0.344586000 | -0.329479000 |
| H | -5.496834000 | -3.333236000 | 2.735522000  |
| H | -6.900690000 | -1.963377000 | 1.211553000  |
| C | 2.340358000  | 0.917471000  | 0.337599000  |
| C | 1.705737000  | 1.884258000  | 1.163857000  |
| C | 3.674145000  | 1.170073000  | -0.092711000 |
| C | 2.424712000  | 3.002478000  | 1.588646000  |
| C | 4.363849000  | 2.286901000  | 0.369427000  |
| C | 3.746990000  | 3.194629000  | 1.220090000  |
| H | 1.918421000  | 3.744280000  | 2.197346000  |
| H | 5.383377000  | 2.450293000  | 0.031313000  |
| H | 4.286418000  | 4.071545000  | 1.567885000  |
| C | 4.401945000  | 0.322846000  | -1.083775000 |
| C | 5.289791000  | -0.675687000 | -0.653312000 |
| C | 4.276371000  | 0.624933000  | -2.452850000 |
| C | 6.057271000  | -1.347136000 | -1.606837000 |
| C | 5.056146000  | -0.078619000 | -3.370409000 |
| C | 5.960174000  | -1.060811000 | -2.965365000 |
| H | 6.753460000  | -2.118634000 | -1.284343000 |
| H | 4.957849000  | 0.151117000  | -4.428849000 |
| C | 0.266990000  | 1.822463000  | 1.543994000  |
| C | -0.726572000 | 2.059161000  | 0.561668000  |
| C | -0.094837000 | 1.676377000  | 2.901042000  |
| C | -2.058161000 | 2.105325000  | 0.967512000  |
| C | -1.446851000 | 1.696036000  | 3.241316000  |
| C | -2.441102000 | 1.906804000  | 2.293703000  |
| H | -2.834005000 | 2.306672000  | 0.234299000  |



|   |              |              |              |
|---|--------------|--------------|--------------|
| H | -1.725154000 | 1.544738000  | 4.279849000  |
| C | 3.300677000  | 1.679733000  | -2.948609000 |
| H | 2.892188000  | 2.199365000  | -2.073884000 |
| C | 2.122649000  | 1.033554000  | -3.691934000 |
| C | 3.988608000  | 2.737166000  | -3.820542000 |
| H | 4.836048000  | 3.190161000  | -3.295790000 |
| H | 4.361895000  | 2.308833000  | -4.757205000 |
| H | 3.279844000  | 3.531178000  | -4.079637000 |
| H | 2.467976000  | 0.500618000  | -4.585630000 |
| H | 1.406302000  | 1.799118000  | -4.010851000 |
| H | 1.592052000  | 0.315674000  | -3.057248000 |
| C | 5.434917000  | -1.025045000 | 0.816898000  |
| H | 4.661011000  | -0.478517000 | 1.369082000  |
| C | 6.798915000  | -0.567676000 | 1.352557000  |
| C | 5.215211000  | -2.520107000 | 1.081180000  |
| H | 4.245599000  | -2.852330000 | 0.697211000  |
| H | 5.993596000  | -3.131223000 | 0.610901000  |
| H | 5.241297000  | -2.718856000 | 2.157807000  |
| H | 7.614424000  | -1.088078000 | 0.837419000  |
| H | 6.882996000  | -0.781252000 | 2.423754000  |
| H | 6.940935000  | 0.507782000  | 1.204384000  |
| C | 6.795064000  | -1.819096000 | -3.977224000 |
| H | 7.459896000  | -2.487110000 | -3.412048000 |
| C | 7.673633000  | -0.879596000 | -4.811919000 |
| C | 5.911974000  | -2.691659000 | -4.879285000 |
| H | 5.300053000  | -3.377755000 | -4.284037000 |
| H | 5.235573000  | -2.074295000 | -5.481306000 |
| H | 6.524391000  | -3.285888000 | -5.566409000 |
| H | 7.063102000  | -0.215260000 | -5.433445000 |
| H | 8.324998000  | -1.453383000 | -5.480195000 |
| H | 8.301662000  | -0.254615000 | -4.169493000 |
| C | -3.904023000 | 1.991017000  | 2.677036000  |
| H | -4.485113000 | 1.788027000  | 1.766170000  |
| C | -4.243645000 | 3.414503000  | 3.145641000  |
| C | -4.314479000 | 0.957684000  | 3.729335000  |
| H | -3.984840000 | -0.047515000 | 3.452258000  |
| H | -3.887549000 | 1.193612000  | 4.710527000  |
| H | -5.404051000 | 0.947935000  | 3.840840000  |
| H | -3.675668000 | 3.663012000  | 4.049891000  |
| H | -5.310978000 | 3.502054000  | 3.379085000  |
| H | -3.994344000 | 4.155272000  | 2.378632000  |
| C | 0.934320000  | 1.578846000  | 4.018863000  |
| H | 1.921237000  | 1.442359000  | 3.563879000  |
| C | 0.716302000  | 0.405596000  | 4.980902000  |
| C | 0.948482000  | 2.894311000  | 4.819716000  |
| H | 1.072576000  | 3.773803000  | 4.180368000  |
| H | 0.005197000  | 3.018062000  | 5.363859000  |
| H | 1.761077000  | 2.884076000  | 5.554908000  |
| H | -0.249227000 | 0.471806000  | 5.492809000  |
| H | 1.498569000  | 0.422244000  | 5.748698000  |
| H | 0.751883000  | -0.551706000 | 4.461730000  |
| C | -0.362405000 | 2.387643000  | -0.884316000 |
| H | 0.453032000  | 1.721208000  | -1.192716000 |
| C | 0.157579000  | 3.832171000  | -0.991142000 |
| C | -1.500701000 | 2.189879000  | -1.887960000 |
| H | -1.931628000 | 1.188284000  | -1.823487000 |
| H | -2.294593000 | 2.933168000  | -1.751248000 |
| H | -1.112141000 | 2.320497000  | -2.903549000 |
| H | -0.625121000 | 4.536551000  | -0.686009000 |
| H | 0.437126000  | 4.058849000  | -2.026972000 |
| H | 1.031663000  | 4.001141000  | -0.357510000 |

**TS2** for ring enlargement from **INT1** to product **2**

114

symmetry c1

|   |              |              |              |
|---|--------------|--------------|--------------|
| C | -0.075710000 | -2.962093000 | -2.264460000 |
| C | 0.486904000  | -1.925093000 | -1.560437000 |
| C | 1.789842000  | -1.454836000 | -1.640440000 |
| C | 2.659284000  | -2.116879000 | -2.503971000 |
| C | 2.141617000  | -3.173223000 | -3.258664000 |
| C | 0.808366000  | -3.581531000 | -3.154452000 |
| H | -1.112385000 | -3.264367000 | -2.163469000 |
| H | 3.699572000  | -1.835723000 | -2.609848000 |
| H | 2.795304000  | -3.693541000 | -3.953186000 |
| H | 0.451592000  | -4.400560000 | -3.772298000 |
| B | 1.466238000  | -0.330161000 | -0.578751000 |
| N | 0.020393000  | -1.068523000 | -0.459994000 |
| N | 0.624303000  | -1.541640000 | 0.781644000  |

|   |              |              |              |
|---|--------------|--------------|--------------|
| C | -1.434250000 | -0.924348000 | -0.281013000 |
| C | -0.385416000 | -1.593298000 | 1.689511000  |
| N | -1.649871000 | -1.292710000 | 1.006611000  |
| O | -0.329332000 | -1.903395000 | 2.860676000  |
| O | -2.181088000 | -0.678342000 | -1.195760000 |
| C | -2.941879000 | -1.544117000 | 1.547235000  |
| C | -3.121255000 | -2.599299000 | 2.444211000  |
| C | -4.028073000 | -0.766887000 | 1.144981000  |
| C | -5.291321000 | -1.041770000 | 1.653950000  |
| H | -3.882118000 | 0.043146000  | 0.442687000  |
| C | -4.390568000 | -2.853576000 | 2.949976000  |
| H | -2.275054000 | -3.199487000 | 2.752779000  |
| C | -5.478933000 | -2.078967000 | 2.561716000  |
| H | -6.133749000 | -0.433744000 | 1.337233000  |
| H | -4.524806000 | -3.670207000 | 3.653051000  |
| H | -6.467542000 | -2.284787000 | 2.960959000  |
| C | 2.003391000  | 1.080354000  | -0.243623000 |
| C | 1.285909000  | 2.115456000  | 0.408910000  |
| C | 3.341703000  | 1.358098000  | -0.644747000 |
| C | 1.856182000  | 3.380814000  | 0.551275000  |
| C | 3.887330000  | 2.629060000  | -0.458793000 |
| C | 3.142755000  | 3.648977000  | 0.110089000  |
| H | 1.287926000  | 4.147204000  | 1.069017000  |
| H | 4.917952000  | 2.798858000  | -0.757787000 |
| H | 3.575738000  | 4.635945000  | 0.247713000  |
| C | 4.283186000  | 0.342848000  | -1.201454000 |
| C | 4.809691000  | -0.663558000 | -0.367460000 |
| C | 4.747875000  | 0.476631000  | -2.526075000 |
| C | 5.800979000  | -1.504210000 | -0.875839000 |
| C | 5.740735000  | -0.387306000 | -2.986649000 |
| C | 6.282754000  | -1.382259000 | -2.175792000 |
| H | 6.214778000  | -2.280317000 | -0.236476000 |
| H | 6.084532000  | -0.291760000 | -4.013931000 |
| C | -0.001005000 | 1.912536000  | 1.139293000  |
| C | -1.247929000 | 2.240209000  | 0.566760000  |
| C | 0.093579000  | 1.569731000  | 2.504445000  |
| C | -2.381577000 | 2.173564000  | 1.375483000  |
| C | -1.077511000 | 1.481477000  | 3.257489000  |
| C | -2.320949000 | 1.783523000  | 2.713265000  |
| H | -3.350327000 | 2.436584000  | 0.957680000  |
| H | -1.006542000 | 1.194239000  | 4.302255000  |
| C | 4.154524000  | 1.490507000  | -3.491281000 |
| H | 3.389969000  | 2.062556000  | -2.954701000 |
| C | 3.457502000  | 0.792788000  | -4.668285000 |
| C | 5.210942000  | 2.482892000  | -3.994211000 |
| H | 5.708611000  | 2.990700000  | -3.161818000 |
| H | 5.983028000  | 1.976778000  | -4.584461000 |
| H | 4.748308000  | 3.243236000  | -4.633097000 |
| H | 4.171156000  | 0.218546000  | -5.269958000 |
| H | 2.986129000  | 1.533066000  | -5.324326000 |
| H | 2.683733000  | 0.104144000  | -4.314872000 |
| C | 4.387291000  | -0.814535000 | 1.084541000  |
| H | 3.446000000  | -0.276657000 | 1.227604000  |
| C | 5.428389000  | -0.158383000 | 2.003164000  |
| C | 4.127644000  | -2.269765000 | 1.487204000  |
| H | 3.432149000  | -2.751550000 | 0.793213000  |
| H | 5.051564000  | -2.857836000 | 1.522718000  |
| H | 3.677289000  | -2.300255000 | 2.484762000  |
| H | 6.399489000  | -0.657953000 | 1.906360000  |
| H | 5.110533000  | -0.225433000 | 3.049771000  |
| H | 5.564781000  | 0.899011000  | 1.750838000  |
| C | 7.321510000  | -2.347725000 | -2.708294000 |
| H | 7.668881000  | -2.950492000 | -1.857702000 |
| C | 8.537498000  | -1.627664000 | -3.302042000 |
| C | 6.691275000  | -3.300967000 | -3.734143000 |
| H | 5.841920000  | -3.837698000 | -3.298196000 |
| H | 6.327905000  | -2.743705000 | -4.605559000 |
| H | 7.422925000  | -4.037464000 | -4.084522000 |
| H | 8.263644000  | -1.051405000 | -4.192777000 |
| H | 9.303312000  | -2.351849000 | -3.600404000 |
| H | 8.979165000  | -0.936548000 | -2.577350000 |
| C | -3.583143000 | 1.781439000  | 3.552290000  |
| H | -4.425071000 | 1.630868000  | 2.861518000  |
| C | -3.765347000 | 3.151163000  | 4.225154000  |
| C | -3.627729000 | 0.657157000  | 4.589284000  |
| H | -3.412033000 | -0.314776000 | 4.136437000  |
| H | -2.904519000 | 0.824947000  | 5.395383000  |
| H | -4.621042000 | 0.609438000  | 5.048303000  |

|   |              |              |              |
|---|--------------|--------------|--------------|
| H | -2.938337000 | 3.347365000  | 4.917698000  |
| H | -4.701724000 | 3.183815000  | 4.793933000  |
| H | -3.780913000 | 3.957681000  | 3.484744000  |
| C | 1.441698000  | 1.461073000  | 3.208960000  |
| H | 2.225010000  | 1.404061000  | 2.445101000  |
| C | 1.606055000  | 0.238118000  | 4.114485000  |
| C | 1.683048000  | 2.747792000  | 4.017940000  |
| H | 1.589803000  | 3.642116000  | 3.394517000  |
| H | 0.953301000  | 2.830410000  | 4.831791000  |
| H | 2.686138000  | 2.738327000  | 4.459159000  |
| H | 0.861996000  | 0.219633000  | 4.918073000  |
| H | 2.595884000  | 0.268609000  | 4.584653000  |
| H | 1.506955000  | -0.694596000 | 3.557661000  |
| C | -1.355263000 | 2.745638000  | -0.867369000 |
| H | -0.576962000 | 2.238210000  | -1.456003000 |
| C | -1.088795000 | 4.260932000  | -0.935216000 |
| C | -2.709544000 | 2.469615000  | -1.530976000 |
| H | -3.011491000 | 1.425375000  | -1.438759000 |
| H | -3.495073000 | 3.106503000  | -1.107963000 |
| H | -2.645684000 | 2.708013000  | -2.597804000 |
| H | -1.794208000 | 4.793430000  | -0.286662000 |
| H | -1.229934000 | 4.621601000  | -1.960386000 |
| H | -0.075249000 | 4.518582000  | -0.624562000 |

Product 2

114

symmetry c1

|   |              |              |              |
|---|--------------|--------------|--------------|
| C | -0.691895000 | -2.217156000 | -1.854670000 |
| C | -0.231379000 | -1.199539000 | -1.026849000 |
| C | 1.042098000  | -0.594913000 | -1.153741000 |
| C | 1.884409000  | -1.080518000 | -2.157430000 |
| C | 1.457520000  | -2.104189000 | -2.991682000 |
| C | 0.180729000  | -2.659452000 | -2.841468000 |
| H | -1.678495000 | -2.646173000 | -1.721058000 |
| H | 2.882440000  | -0.671356000 | -2.264201000 |
| H | 2.119056000  | -2.483348000 | -3.764723000 |
| H | -0.136591000 | -3.458985000 | -3.504988000 |
| B | 1.162659000  | 0.497292000  | -0.059395000 |
| N | -0.089978000 | 0.325591000  | 0.653879000  |
| N | -0.911189000 | -0.612897000 | 0.031795000  |
| C | -0.634618000 | 0.627534000  | 1.894389000  |
| C | -1.988130000 | -0.941055000 | 0.829013000  |
| N | -1.831449000 | -0.114615000 | 1.965342000  |
| O | -2.858411000 | -1.748696000 | 0.592296000  |
| O | -0.151518000 | 1.345145000  | 2.739134000  |
| C | -2.757358000 | -0.051288000 | 3.042385000  |
| C | -4.124943000 | -0.095581000 | 2.772410000  |
| C | -2.293357000 | 0.060282000  | 4.352791000  |
| C | -3.211602000 | 0.141763000  | 5.393099000  |
| H | -1.229114000 | 0.098723000  | 4.550162000  |
| C | -5.028370000 | -0.028683000 | 3.825641000  |
| H | -4.472901000 | -0.193413000 | 1.751120000  |
| C | -4.578067000 | 0.095308000  | 5.136484000  |
| H | -2.850721000 | 0.235361000  | 6.412944000  |
| H | -6.092902000 | -0.068517000 | 3.615297000  |
| H | -5.289434000 | 0.153541000  | 5.954719000  |
| C | 2.183627000  | 1.617879000  | 0.327998000  |
| C | 1.758823000  | 2.969428000  | 0.325460000  |
| C | 3.505596000  | 1.308461000  | 0.695983000  |
| C | 2.641160000  | 3.964034000  | 0.744219000  |
| C | 4.350288000  | 2.318333000  | 1.161209000  |
| C | 3.917482000  | 3.636998000  | 1.190999000  |
| H | 2.332659000  | 5.003678000  | 0.717837000  |
| H | 5.357828000  | 2.063840000  | 1.479615000  |
| H | 4.584998000  | 4.419811000  | 1.540438000  |
| C | 4.003012000  | -0.085379000 | 0.513207000  |
| C | 3.499704000  | -1.140441000 | 1.300065000  |
| C | 4.924724000  | -0.357215000 | -0.521974000 |
| C | 3.886476000  | -2.447529000 | 1.004963000  |
| C | 5.281870000  | -1.680711000 | -0.774820000 |
| C | 4.758506000  | -2.740423000 | -0.038210000 |
| H | 3.494100000  | -3.268252000 | 1.600428000  |
| H | 5.979883000  | -1.891327000 | -1.581768000 |
| C | 0.379257000  | 3.247719000  | -0.176690000 |
| C | 0.053939000  | 2.863975000  | -1.501145000 |
| C | -0.636073000 | 3.735398000  | 0.676307000  |
| C | -1.287377000 | 2.815424000  | -1.879847000 |
| C | -1.962038000 | 3.656533000  | 0.250533000  |

|   |              |              |              |
|---|--------------|--------------|--------------|
| C | -2.310915000 | 3.155087000  | -1.000319000 |
| H | -1.551034000 | 2.490234000  | -2.881849000 |
| H | -2.746448000 | 3.978175000  | 0.929184000  |
| C | 5.557982000  | 0.742885000  | -1.364622000 |
| H | 5.059269000  | 1.687413000  | -1.125382000 |
| C | 5.405724000  | 0.525420000  | -2.875948000 |
| C | 7.042796000  | 0.894073000  | -0.998234000 |
| H | 7.170649000  | 1.064770000  | 0.075346000  |
| H | 7.602490000  | -0.012111000 | -1.257433000 |
| H | 7.490878000  | 1.735778000  | -1.538222000 |
| H | 5.868599000  | -0.410851000 | -3.205580000 |
| H | 5.892649000  | 1.342592000  | -3.419512000 |
| H | 4.353887000  | 0.510407000  | -3.178615000 |
| C | 2.627753000  | -0.870527000 | 2.514953000  |
| H | 2.147625000  | 0.105395000  | 2.390894000  |
| C | 3.513058000  | -0.767174000 | 3.766991000  |
| C | 1.522739000  | -1.912539000 | 2.719071000  |
| H | 0.963838000  | -2.096441000 | 1.794174000  |
| H | 1.924714000  | -2.873013000 | 3.059355000  |
| H | 0.821783000  | -1.568201000 | 3.487909000  |
| H | 4.041949000  | -1.711003000 | 3.944299000  |
| H | 2.904713000  | -0.538807000 | 4.649396000  |
| H | 4.260763000  | 0.024349000  | 3.650914000  |
| C | 5.103461000  | -4.175386000 | -0.377488000 |
| H | 4.630491000  | -4.810250000 | 0.384723000  |
| C | 6.613961000  | -4.435286000 | -0.333342000 |
| C | 4.515465000  | -4.564509000 | -1.741339000 |
| H | 3.436074000  | -4.382295000 | -1.767711000 |
| H | 4.974480000  | -3.974812000 | -2.543643000 |
| H | 4.697422000  | -5.623733000 | -1.955532000 |
| H | 7.137400000  | -3.859034000 | -1.104331000 |
| H | 6.827360000  | -5.495244000 | -0.509963000 |
| H | 7.033220000  | -4.154862000 | 0.638062000  |
| C | -3.761809000 | 2.968493000  | -1.390502000 |
| H | -3.777534000 | 2.648095000  | -2.441644000 |
| C | -4.570938000 | 4.266365000  | -1.282085000 |
| C | -4.396846000 | 1.852600000  | -0.548002000 |
| H | -3.846234000 | 0.912406000  | -0.664378000 |
| H | -4.386910000 | 2.120442000  | 0.515082000  |
| H | -5.437316000 | 1.679467000  | -0.845840000 |
| H | -4.634381000 | 4.609301000  | -0.243514000 |
| H | -5.593978000 | 4.112043000  | -1.642434000 |
| H | -4.113465000 | 5.066153000  | -1.873093000 |
| C | -0.325982000 | 4.400982000  | 2.006283000  |
| H | 0.615107000  | 3.984294000  | 2.382085000  |
| C | -1.392749000 | 4.201570000  | 3.089789000  |
| C | -0.141389000 | 5.913186000  | 1.772393000  |
| H | 0.589994000  | 6.127249000  | 0.988079000  |
| H | -1.091956000 | 6.360879000  | 1.459076000  |
| H | 0.180838000  | 6.409812000  | 2.694959000  |
| H | -2.306022000 | 4.766114000  | 2.869143000  |
| H | -1.011717000 | 4.575483000  | 4.046297000  |
| H | -1.650969000 | 3.148725000  | 3.221418000  |
| C | 1.145885000  | 2.640879000  | -2.542802000 |
| H | 1.965318000  | 2.078960000  | -2.080770000 |
| C | 1.717743000  | 4.007369000  | -2.958583000 |
| C | 0.694433000  | 1.859979000  | -3.777659000 |
| H | 0.216292000  | 0.912706000  | -3.508797000 |
| H | -0.002311000 | 2.440890000  | -4.392851000 |
| H | 1.563336000  | 1.630440000  | -4.403848000 |
| H | 0.932173000  | 4.629120000  | -3.403414000 |
| H | 2.518316000  | 3.881094000  | -3.696701000 |
| H | 2.126554000  | 4.540849000  | -2.094995000 |

---

Tetrazine

26

symmetry c1

|   |              |              |              |
|---|--------------|--------------|--------------|
| N | 0.654080000  | 1.191699000  | -0.000053000 |
| C | 1.285755000  | 0.000001000  | -0.000005000 |
| N | 0.654080000  | -1.191699000 | 0.000034000  |
| N | -0.654080000 | -1.191699000 | -0.000023000 |
| C | -1.285755000 | 0.000001000  | -0.000007000 |
| N | -0.654080000 | 1.191699000  | 0.000003000  |
| N | 5.561382000  | 0.000000000  | 0.000009000  |
| C | 2.756749000  | 0.000000000  | 0.000000000  |
| N | -5.561382000 | 0.000000000  | 0.000009000  |
| C | -2.756749000 | 0.000000000  | -0.000001000 |

|   |              |              |              |
|---|--------------|--------------|--------------|
| C | -3.475163000 | 1.199006000  | -0.000606000 |
| C | -4.863024000 | 1.140336000  | -0.000573000 |
| C | 3.475163000  | 1.199006000  | 0.000648000  |
| C | 4.863023000  | 1.140336000  | 0.000623000  |
| C | 4.863023000  | -1.140336000 | -0.000610000 |
| C | 3.475163000  | -1.199006000 | -0.000643000 |
| C | -4.863023000 | -1.140336000 | 0.000586000  |
| C | -3.475163000 | -1.199006000 | 0.000609000  |
| H | -2.959239000 | 2.152474000  | -0.001095000 |
| H | -5.445442000 | 2.060850000  | -0.001042000 |
| H | 2.959239000  | 2.152474000  | 0.001164000  |
| H | 5.445441000  | 2.060850000  | 0.001128000  |
| H | 5.445441000  | -2.060851000 | -0.001111000 |
| H | 2.959239000  | -2.152474000 | -0.001163000 |
| H | -5.445441000 | -2.060851000 | 0.001061000  |
| H | -2.959239000 | -2.152474000 | 0.001094000  |

Complex **1-4,4'-bptz** bound by tetrazine nitrogen atom  
122

symmetry c1

|   |              |              |              |
|---|--------------|--------------|--------------|
| C | 3.721009000  | 0.421267000  | 2.791581000  |
| C | 4.457502000  | 0.643538000  | 1.615915000  |
| C | 3.914306000  | 0.398711000  | 0.357064000  |
| C | 2.601847000  | -0.068295000 | 0.340581000  |
| C | 1.925253000  | -0.338991000 | 1.487515000  |
| C | 2.420314000  | -0.082825000 | 2.758564000  |
| B | 1.193860000  | -0.709387000 | 0.089906000  |
| N | 0.016318000  | 0.342875000  | 0.028451000  |
| C | 0.181129000  | 1.710805000  | 0.074621000  |
| N | -1.211507000 | -0.130899000 | 0.184951000  |
| C | -2.157260000 | 0.724856000  | 0.578930000  |
| N | -1.927573000 | 2.005777000  | 0.931509000  |
| N | -0.756291000 | 2.497780000  | 0.598244000  |
| C | -3.539325000 | 0.240223000  | 0.710076000  |
| C | -4.603653000 | 1.136319000  | 0.588797000  |
| C | -5.898177000 | 0.646791000  | 0.711124000  |
| N | -6.187766000 | -0.636442000 | 0.951891000  |
| C | -5.159162000 | -1.480436000 | 1.082115000  |
| C | -3.828310000 | -1.098580000 | 0.968771000  |
| C | 1.400614000  | 2.402413000  | -0.365330000 |
| C | 1.970745000  | 2.180133000  | -1.616398000 |
| C | 3.088541000  | 2.919229000  | -1.973671000 |
| N | 3.668127000  | 3.825350000  | -1.177948000 |
| C | 3.104345000  | 4.034992000  | 0.015692000  |
| C | 1.967359000  | 3.372522000  | 0.461348000  |
| C | 0.972879000  | -2.169879000 | -0.545259000 |
| C | 0.447528000  | -2.399926000 | -1.848264000 |
| C | 0.521507000  | -3.659086000 | -2.443523000 |
| C | 1.016662000  | -4.751351000 | -1.746544000 |
| C | 1.441576000  | -4.572874000 | -0.439703000 |
| C | 1.468774000  | -3.305054000 | 0.149869000  |
| H | 4.186139000  | 0.630686000  | 3.751961000  |
| H | 5.472021000  | 1.025917000  | 1.695698000  |
| H | 4.492189000  | 0.598293000  | -0.543707000 |
| H | 1.879257000  | -0.288510000 | 3.678049000  |
| H | -4.419857000 | 2.188734000  | 0.400118000  |
| H | -6.747264000 | 1.321621000  | 0.611273000  |
| H | -5.410602000 | -2.520299000 | 1.287895000  |
| H | -3.032997000 | -1.824535000 | 1.082337000  |
| H | 1.546105000  | 1.447960000  | -2.289421000 |
| H | 3.550110000  | 2.766993000  | -2.949090000 |
| H | 3.586544000  | 4.774416000  | 0.653771000  |
| H | 1.547897000  | 3.579262000  | 1.439891000  |
| H | 0.136742000  | -3.785421000 | -3.452149000 |
| H | 1.039290000  | -5.735947000 | -2.205589000 |
| H | 1.784602000  | -5.421987000 | 0.144534000  |
| C | -0.290039000 | -1.324429000 | -2.586188000 |
| C | 0.366021000  | -0.368870000 | -3.389471000 |
| C | -1.698941000 | -1.248549000 | -2.452030000 |
| C | -0.352437000 | 0.746701000  | -3.842679000 |
| C | -2.359028000 | -0.104303000 | -2.909439000 |
| C | -1.698391000 | 0.932713000  | -3.560068000 |
| H | 0.167997000  | 1.494804000  | -4.440217000 |
| H | -3.435514000 | -0.039089000 | -2.755541000 |
| C | 2.026546000  | -3.260767000 | 1.541661000  |
| C | 1.145691000  | -3.118242000 | 2.638704000  |
| C | 3.402269000  | -3.463791000 | 1.784950000  |

|   |              |              |              |
|---|--------------|--------------|--------------|
| C | 1.641565000  | -3.198057000 | 3.936765000  |
| C | 3.850618000  | -3.487527000 | 3.109659000  |
| C | 2.996040000  | -3.373456000 | 4.197496000  |
| H | 0.959007000  | -3.106615000 | 4.778133000  |
| H | 4.918971000  | -3.608192000 | 3.281797000  |
| C | 3.515922000  | -3.393572000 | 5.620080000  |
| H | 2.639481000  | -3.425826000 | 6.283056000  |
| C | 4.294440000  | -2.108066000 | 5.933237000  |
| C | 4.367679000  | -4.634275000 | 5.912120000  |
| H | 3.821304000  | -5.551896000 | 5.672372000  |
| H | 5.291760000  | -4.629842000 | 5.323656000  |
| H | 4.650480000  | -4.665819000 | 6.970174000  |
| H | 5.168033000  | -2.016847000 | 5.277712000  |
| H | 4.644925000  | -2.106300000 | 6.971700000  |
| H | 3.667096000  | -1.224028000 | 5.778393000  |
| C | -2.426639000 | 2.191393000  | -3.980776000 |
| H | -1.689713000 | 2.847106000  | -4.465253000 |
| C | -2.989233000 | 2.934607000  | -2.761894000 |
| C | -3.533886000 | 1.892376000  | -4.999595000 |
| H | -3.134577000 | 1.362223000  | -5.869939000 |
| H | -4.318092000 | 1.268279000  | -4.556486000 |
| H | -4.001604000 | 2.821070000  | -5.344486000 |
| H | -3.736779000 | 2.320975000  | -2.245130000 |
| H | -3.475161000 | 3.868336000  | -3.065886000 |
| H | -2.197282000 | 3.179599000  | -2.045809000 |
| C | 1.769178000  | -0.519528000 | -3.977972000 |
| H | 2.054045000  | 0.488579000  | -4.315621000 |
| C | 1.672161000  | -1.392142000 | -5.242847000 |
| C | 2.898424000  | -1.026390000 | -3.081338000 |
| H | 2.929555000  | -0.504181000 | -2.123313000 |
| H | 2.799907000  | -2.092552000 | -2.873162000 |
| H | 3.856354000  | -0.871586000 | -3.591475000 |
| H | 1.414276000  | -2.421506000 | -4.973303000 |
| H | 2.635306000  | -1.410574000 | -5.765466000 |
| H | 0.907972000  | -1.016252000 | -5.930588000 |
| C | 4.511667000  | -3.692226000 | 0.752955000  |
| H | 5.392602000  | -3.210636000 | 1.201473000  |
| C | 4.364915000  | -3.079589000 | -0.639797000 |
| C | 4.845349000  | -5.190691000 | 0.641768000  |
| H | 5.025374000  | -5.635917000 | 1.625471000  |
| H | 4.024978000  | -5.737927000 | 0.166278000  |
| H | 5.741586000  | -5.333816000 | 0.026946000  |
| H | 3.680870000  | -3.646683000 | -1.274053000 |
| H | 5.345956000  | -3.077088000 | -1.129664000 |
| H | 4.009017000  | -2.049931000 | -0.589523000 |
| C | -0.346481000 | -2.917445000 | 2.434507000  |
| H | -0.474776000 | -2.468165000 | 1.445694000  |
| C | -0.974668000 | -1.952571000 | 3.445072000  |
| C | -1.077190000 | -4.266873000 | 2.443279000  |
| H | -0.689249000 | -4.929341000 | 1.662682000  |
| H | -0.946469000 | -4.766333000 | 3.410572000  |
| H | -2.152469000 | -4.131202000 | 2.272222000  |
| H | -0.974222000 | -2.357475000 | 4.462485000  |
| H | -2.021606000 | -1.760374000 | 3.185684000  |
| H | -0.447143000 | -0.992693000 | 3.459161000  |
| C | -2.644928000 | -2.360854000 | -1.988177000 |
| H | -3.521891000 | -1.831034000 | -1.592606000 |
| C | -2.221900000 | -3.363261000 | -0.911391000 |
| C | -3.126165000 | -3.128202000 | -3.235453000 |
| H | -3.554243000 | -2.453062000 | -3.982968000 |
| H | -2.290970000 | -3.663237000 | -3.700291000 |
| H | -3.886912000 | -3.865654000 | -2.954744000 |
| H | -1.619450000 | -4.178078000 | -1.315202000 |
| H | -3.124974000 | -3.808550000 | -0.476005000 |
| H | -1.642363000 | -2.898573000 | -0.115280000 |

Complex 1 with 4,4'-bptz through pyridine nitrogen atom  
122

symmetry c1

|   |              |             |             |
|---|--------------|-------------|-------------|
| C | -6.375306000 | 6.297896000 | 3.779861000 |
| C | -6.992771000 | 5.055505000 | 3.586938000 |
| C | -6.601722000 | 4.199132000 | 2.552971000 |
| C | -5.564688000 | 4.638667000 | 1.737805000 |
| C | -4.971703000 | 5.867485000 | 1.930102000 |
| C | -5.340827000 | 6.733378000 | 2.947649000 |
| B | -4.403167000 | 5.006412000 | 0.745313000 |
| N | 1.807308000  | 3.638371000 | 2.390022000 |
| C | 0.706199000  | 2.888820000 | 2.600821000 |

|   |              |              |              |
|---|--------------|--------------|--------------|
| N | 2.955223000  | 3.166502000  | 2.800735000  |
| C | 2.962725000  | 1.959975000  | 3.405893000  |
| N | 1.860243000  | 1.206679000  | 3.607493000  |
| N | 0.712823000  | 1.679550000  | 3.198792000  |
| C | 4.252219000  | 1.430111000  | 3.870675000  |
| C | 4.332707000  | 0.180052000  | 4.491677000  |
| C | 5.577185000  | -0.272413000 | 4.910715000  |
| N | 6.712013000  | 0.418107000  | 4.756538000  |
| C | 6.622361000  | 1.612534000  | 4.161800000  |
| C | 5.431769000  | 2.161935000  | 3.703918000  |
| C | -0.580227000 | 3.412356000  | 2.130859000  |
| C | -0.652409000 | 4.631918000  | 1.445613000  |
| C | -1.867984000 | 5.058738000  | 0.961251000  |
| N | -3.001367000 | 4.360938000  | 1.167093000  |
| C | -2.949699000 | 3.201355000  | 1.845479000  |
| C | -1.761125000 | 2.692678000  | 2.325978000  |
| C | -4.495649000 | 5.294153000  | -0.831608000 |
| C | -4.122116000 | 4.325685000  | -1.800104000 |
| C | -4.300044000 | 4.577743000  | -3.163566000 |
| C | -4.787528000 | 5.795527000  | -3.612298000 |
| C | -5.144536000 | 6.759990000  | -2.682192000 |
| C | -5.036102000 | 6.510937000  | -1.311640000 |
| H | -6.713301000 | 6.933204000  | 4.595455000  |
| H | -7.797042000 | 4.756995000  | 4.255497000  |
| H | -7.107706000 | 3.244028000  | 2.424256000  |
| H | -4.886221000 | 7.711053000  | 3.098108000  |
| H | 3.443068000  | -0.420941000 | 4.641755000  |
| H | 5.667054000  | -1.242864000 | 5.396982000  |
| H | 7.555149000  | 2.162374000  | 4.044073000  |
| H | 5.415668000  | 3.135785000  | 3.227928000  |
| H | 0.236426000  | 5.229054000  | 1.282072000  |
| H | -1.980149000 | 5.982522000  | 0.403923000  |
| H | -3.901789000 | 2.702947000  | 1.987223000  |
| H | -1.754802000 | 1.745888000  | 2.850876000  |
| H | -4.062018000 | 3.794837000  | -3.876731000 |
| H | -4.901808000 | 5.984217000  | -4.676211000 |
| H | -5.535139000 | 7.720671000  | -3.008026000 |
| C | -3.557260000 | 2.988278000  | -1.424376000 |
| C | -2.197866000 | 2.688438000  | -1.661917000 |
| C | -4.400837000 | 1.995705000  | -0.875902000 |
| C | -1.702543000 | 1.437219000  | -1.284536000 |
| C | -3.857048000 | 0.764200000  | -0.512390000 |
| C | -2.508010000 | 0.466611000  | -0.700823000 |
| H | -0.655239000 | 1.203407000  | -1.463205000 |
| H | -4.507844000 | 0.006855000  | -0.086038000 |
| C | -5.567659000 | 7.582205000  | -0.411547000 |
| C | -6.942969000 | 7.607096000  | -0.116551000 |
| C | -4.729372000 | 8.602848000  | 0.067104000  |
| C | -7.448366000 | 8.655113000  | 0.652307000  |
| C | -5.275508000 | 9.630325000  | 0.833515000  |
| C | -6.634240000 | 9.673803000  | 1.136991000  |
| H | -8.508136000 | 8.676108000  | 0.895491000  |
| H | -4.621993000 | 10.415678000 | 1.208012000  |
| C | -1.261051000 | 3.653875000  | -2.375842000 |
| H | -1.690207000 | 4.660702000  | -2.293908000 |
| C | -5.902565000 | 2.215707000  | -0.783415000 |
| H | -6.072696000 | 3.271830000  | -0.550477000 |
| C | -3.241735000 | 8.609589000  | -0.232878000 |
| H | -3.011110000 | 7.672985000  | -0.756198000 |
| C | -7.879008000 | 6.523755000  | -0.626639000 |
| H | -7.263091000 | 5.650268000  | -0.876723000 |
| C | -7.209692000 | 10.776618000 | 2.002037000  |
| H | -8.300012000 | 10.638927000 | 2.017123000  |
| C | -1.930171000 | -0.875147000 | -0.296267000 |
| H | -0.929914000 | -0.943982000 | -0.747136000 |
| C | -1.761660000 | -0.968434000 | 1.226749000  |
| H | -1.348112000 | -1.941524000 | 1.515060000  |
| H | -1.086218000 | -0.190511000 | 1.597240000  |
| H | -2.729540000 | -0.850608000 | 1.729097000  |
| C | -2.760516000 | -2.051595000 | -0.823452000 |
| H | -2.255439000 | -3.000261000 | -0.612077000 |
| H | -3.745276000 | -2.090169000 | -0.345254000 |
| H | -2.913622000 | -1.973855000 | -1.904374000 |
| C | -6.583168000 | 1.386865000  | 0.307964000  |
| H | -7.617299000 | 1.723641000  | 0.434354000  |
| H | -6.620339000 | 0.321973000  | 0.050201000  |
| H | -6.073249000 | 1.488195000  | 1.271786000  |
| C | -6.554845000 | 1.917899000  | -2.144009000 |

|   |              |              |              |
|---|--------------|--------------|--------------|
| H | -6.152138000 | 2.565022000  | -2.928187000 |
| H | -6.378047000 | 0.874982000  | -2.433153000 |
| H | -7.637409000 | 2.081291000  | -2.090765000 |
| C | 0.161961000  | 3.681980000  | -1.799280000 |
| H | 0.165290000  | 3.764010000  | -0.710755000 |
| H | 0.721705000  | 2.779426000  | -2.067905000 |
| H | 0.713414000  | 4.534311000  | -2.210650000 |
| C | -1.157196000 | 3.299306000  | -3.870634000 |
| H | -0.492892000 | 4.003351000  | -4.384814000 |
| H | -0.741360000 | 2.291620000  | -3.986761000 |
| H | -2.126401000 | 3.318906000  | -4.371501000 |
| C | -2.402060000 | 8.659697000  | 1.050636000  |
| H | -2.696096000 | 7.863121000  | 1.742685000  |
| H | -1.334692000 | 8.551895000  | 0.819864000  |
| H | -2.525484000 | 9.615282000  | 1.572034000  |
| C | -2.871520000 | 9.761421000  | -1.176592000 |
| H | -3.092808000 | 10.730171000 | -0.714269000 |
| H | -1.802979000 | 9.738310000  | -1.420715000 |
| H | -3.440315000 | 9.698273000  | -2.109866000 |
| C | -8.595861000 | 6.980589000  | -1.906601000 |
| H | -7.884549000 | 7.224198000  | -2.700715000 |
| H | -9.263764000 | 6.193272000  | -2.275124000 |
| H | -9.198985000 | 7.874010000  | -1.705484000 |
| C | -8.906293000 | 6.077195000  | 0.419291000  |
| H | -9.432020000 | 5.183869000  | 0.063264000  |
| H | -8.424084000 | 5.837410000  | 1.370488000  |
| H | -9.664739000 | 6.847668000  | 0.598831000  |
| C | -6.921764000 | 12.170700000 | 1.432140000  |
| H | -7.416393000 | 12.942774000 | 2.032230000  |
| H | -5.847346000 | 12.386012000 | 1.436538000  |
| H | -7.276135000 | 12.254686000 | 0.399880000  |
| C | -6.704186000 | 10.659060000 | 3.446493000  |
| H | -6.935428000 | 9.672010000  | 3.859757000  |
| H | -5.617171000 | 10.795164000 | 3.489909000  |
| H | -7.165122000 | 11.420973000 | 4.085594000  |

**TS3** for reaction between **1-4,4'-bptz** to **INT2**

122

symmetry c1

|   |              |              |              |
|---|--------------|--------------|--------------|
| C | -4.840981000 | -1.137565000 | -0.510456000 |
| C | -4.037788000 | -2.273784000 | -0.460176000 |
| C | -2.662991000 | -2.178411000 | -0.743771000 |
| C | -2.214547000 | -0.959577000 | -1.162206000 |
| C | -2.933359000 | 0.220511000  | -1.213564000 |
| C | -4.297977000 | 0.089861000  | -0.855836000 |
| B | -2.265355000 | 1.604583000  | -1.309737000 |
| N | -0.776662000 | 1.685314000  | -1.434246000 |
| C | 0.117108000  | 0.810657000  | -2.038314000 |
| N | -0.214512000 | 2.835217000  | -0.945415000 |
| C | 1.084235000  | 2.795448000  | -0.701727000 |
| N | 1.895094000  | 1.735892000  | -0.912380000 |
| N | 1.394905000  | 0.819513000  | -1.759029000 |
| C | 1.662810000  | 3.999433000  | -0.075405000 |
| C | 3.044218000  | 4.130959000  | 0.071625000  |
| C | 3.541611000  | 5.283959000  | 0.667093000  |
| N | 2.774148000  | 6.287679000  | 1.105769000  |
| C | 1.451524000  | 6.148734000  | 0.959352000  |
| C | 0.848009000  | 5.036534000  | 0.386871000  |
| C | -0.374998000 | -0.174393000 | -2.987609000 |
| C | 0.082830000  | -1.495157000 | -2.919395000 |
| C | -0.404177000 | -2.408853000 | -3.847678000 |
| N | -1.288342000 | -2.094302000 | -4.798438000 |
| C | -1.709206000 | -0.823628000 | -4.857196000 |
| C | -1.287535000 | 0.171186000  | -3.987528000 |
| C | -2.955230000 | 3.005417000  | -1.055266000 |
| C | -2.960671000 | 3.973237000  | -2.094017000 |
| C | -3.355947000 | 5.283182000  | -1.825499000 |
| C | -3.728330000 | 5.670056000  | -0.545922000 |
| C | -3.805815000 | 4.714828000  | 0.456187000  |
| C | -3.476192000 | 3.377951000  | 0.212430000  |
| H | -5.893618000 | -1.207590000 | -0.251030000 |
| H | -4.471909000 | -3.246580000 | -0.236659000 |
| H | -2.031110000 | -3.062603000 | -0.707920000 |
| H | -4.899317000 | 0.990393000  | -0.793621000 |
| H | 3.707260000  | 3.347255000  | -0.278070000 |
| H | 4.616232000  | 5.410168000  | 0.794335000  |
| H | 0.838088000  | 6.971779000  | 1.324643000  |
| H | -0.232861000 | 4.971740000  | 0.306487000  |



|   |              |              |              |
|---|--------------|--------------|--------------|
| H | 0.797703000  | -1.783194000 | -2.156114000 |
| H | -0.069296000 | -3.445027000 | -3.822719000 |
| H | -2.416812000 | -0.584496000 | -5.650187000 |
| H | -1.642135000 | 1.191164000  | -4.099602000 |
| H | -3.387200000 | 5.999403000  | -2.641207000 |
| H | -3.999089000 | 6.702199000  | -0.341614000 |
| H | -4.151817000 | 4.992049000  | 1.448034000  |
| C | -3.799356000 | 2.383435000  | 1.291130000  |
| C | -5.159955000 | 2.085375000  | 1.553700000  |
| C | -2.800462000 | 1.745714000  | 2.048446000  |
| C | -5.469218000 | 1.104970000  | 2.493291000  |
| C | -3.161242000 | 0.765826000  | 2.974685000  |
| C | -4.486061000 | 0.413735000  | 3.196276000  |
| H | -6.514252000 | 0.868429000  | 2.677589000  |
| H | -2.384427000 | 0.266499000  | 3.549016000  |
| C | -2.612148000 | 3.641174000  | -3.522954000 |
| C | -1.353998000 | 4.049351000  | -4.046367000 |
| C | -3.540968000 | 3.029219000  | -4.398726000 |
| C | -1.011569000 | 3.729827000  | -5.356883000 |
| C | -3.142360000 | 2.754301000  | -5.715637000 |
| C | -1.885465000 | 3.061135000  | -6.208858000 |
| H | -0.036834000 | 4.029321000  | -5.730752000 |
| H | -3.865064000 | 2.289418000  | -6.385227000 |
| C | -1.351575000 | 2.179115000  | 1.963971000  |
| H | -1.231911000 | 2.764715000  | 1.048198000  |
| C | -6.316968000 | 2.813081000  | 0.878488000  |
| H | -5.916007000 | 3.409380000  | 0.053793000  |
| C | -4.845534000 | -0.692051000 | 4.166296000  |
| H | -3.911754000 | -1.018225000 | 4.645340000  |
| C | -4.997033000 | 2.627834000  | -4.129196000 |
| H | -5.528068000 | 2.955549000  | -5.035621000 |
| C | -0.375225000 | 4.906111000  | -3.259019000 |
| H | -0.623712000 | 4.819047000  | -2.196950000 |
| C | -1.490192000 | 2.716717000  | -7.629020000 |
| H | -2.338537000 | 2.184776000  | -8.082453000 |
| C | -1.227543000 | 3.980392000  | -8.459297000 |
| H | -1.006245000 | 3.718892000  | -9.499859000 |
| H | -2.094304000 | 4.648817000  | -8.446643000 |
| H | -0.368946000 | 4.534904000  | -8.064397000 |
| C | -0.274929000 | 1.780532000  | -7.658368000 |
| H | -0.454761000 | 0.876884000  | -7.067296000 |
| H | -0.044232000 | 1.480987000  | -8.686514000 |
| H | 0.612033000  | 2.276081000  | -7.247787000 |
| C | -5.435137000 | -1.897223000 | 3.420249000  |
| H | -5.630776000 | -2.725270000 | 4.110953000  |
| H | -6.382817000 | -1.628975000 | 2.938412000  |
| H | -4.750427000 | -2.245989000 | 2.640262000  |
| C | -5.795522000 | -0.208845000 | 5.268671000  |
| H | -6.764304000 | 0.089201000  | 4.852533000  |
| H | -5.979255000 | -1.006779000 | 5.996619000  |
| H | -5.377508000 | 0.653152000  | 5.798032000  |
| C | -0.362389000 | 1.010118000  | 1.913595000  |
| H | -0.320748000 | 0.474336000  | 2.868199000  |
| H | -0.633622000 | 0.288840000  | 1.134800000  |
| H | 0.649422000  | 1.376683000  | 1.708107000  |
| C | -1.022174000 | 3.117996000  | 3.135799000  |
| H | -1.689276000 | 3.986844000  | 3.142818000  |
| H | -1.137626000 | 2.597038000  | 4.093499000  |
| H | 0.010792000  | 3.477245000  | 3.060550000  |
| C | -7.384487000 | 1.878072000  | 0.292049000  |
| H | -6.966076000 | 1.172863000  | -0.432347000 |
| H | -7.892984000 | 1.299907000  | 1.070744000  |
| H | -8.147592000 | 2.469966000  | -0.225399000 |
| C | -6.978695000 | 3.782271000  | 1.872091000  |
| H | -7.764380000 | 4.364881000  | 1.377839000  |
| H | -7.434506000 | 3.229454000  | 2.701480000  |
| H | -6.251402000 | 4.477838000  | 2.300686000  |
| C | -5.740302000 | 3.275522000  | -2.962944000 |
| H | -5.660586000 | 4.365705000  | -2.979768000 |
| H | -6.801402000 | 3.009601000  | -3.031798000 |
| H | -5.372070000 | 2.930230000  | -1.996063000 |
| C | -5.127742000 | 1.096702000  | -4.076124000 |
| H | -6.171740000 | 0.804630000  | -3.913739000 |
| H | -4.787486000 | 0.633772000  | -5.007345000 |
| H | -4.528291000 | 0.681697000  | -3.263219000 |
| C | 1.086690000  | 4.478468000  | -3.450756000 |
| H | 1.721114000  | 4.971871000  | -2.707269000 |
| H | 1.217428000  | 3.395816000  | -3.354423000 |

|   |              |             |              |
|---|--------------|-------------|--------------|
| H | 1.465111000  | 4.770059000 | -4.436578000 |
| C | -0.517594000 | 6.384501000 | -3.660394000 |
| H | -0.284454000 | 6.515563000 | -4.723584000 |
| H | -1.530326000 | 6.758235000 | -3.491377000 |
| H | 0.176481000  | 7.002127000 | -3.078833000 |

**INT2**

122

symmetry c1

|   |              |              |              |
|---|--------------|--------------|--------------|
| C | -4.574954000 | -1.160844000 | -0.275104000 |
| C | -3.907796000 | -2.361821000 | -0.468526000 |
| C | -2.698436000 | -2.358899000 | -1.152005000 |
| C | -2.123149000 | -1.180582000 | -1.628408000 |
| C | -2.729105000 | 0.083441000  | -1.346228000 |
| C | -3.988323000 | 0.014653000  | -0.715042000 |
| B | -2.185990000 | 1.573942000  | -1.393407000 |
| N | -0.743864000 | 1.799766000  | -1.460838000 |
| C | 0.078352000  | 0.784982000  | -1.920923000 |
| N | -0.123294000 | 2.899329000  | -0.919892000 |
| C | 1.105451000  | 2.672962000  | -0.534705000 |
| N | 1.780177000  | 1.457569000  | -0.587423000 |
| N | 1.245058000  | 0.526832000  | -1.336982000 |
| C | 1.834072000  | 3.801067000  | 0.073797000  |
| C | 3.193572000  | 3.701175000  | 0.373589000  |
| C | 3.830611000  | 4.797187000  | 0.946127000  |
| N | 3.219192000  | 5.949413000  | 1.235460000  |
| C | 1.913244000  | 6.030306000  | 0.949306000  |
| C | 1.181156000  | 5.000380000  | 0.376963000  |
| C | -0.457528000 | -0.024247000 | -2.945936000 |
| C | -0.858945000 | -1.393370000 | -2.509289000 |
| C | -1.149246000 | -2.270585000 | -3.698057000 |
| N | -1.542825000 | -1.806352000 | -4.832766000 |
| C | -1.606035000 | -0.439690000 | -4.996595000 |
| C | -1.022005000 | 0.456530000  | -4.126597000 |
| C | -2.995251000 | 2.921281000  | -1.125823000 |
| C | -3.033185000 | 3.876603000  | -2.176603000 |
| C | -3.474096000 | 5.178972000  | -1.935705000 |
| C | -3.853121000 | 5.583084000  | -0.665758000 |
| C | -3.881486000 | 4.647815000  | 0.356328000  |
| C | -3.507895000 | 3.317201000  | 0.142077000  |
| H | -5.536121000 | -1.128590000 | 0.229465000  |
| H | -4.336787000 | -3.300044000 | -0.127744000 |
| H | -2.201333000 | -3.304474000 | -1.353367000 |
| H | -4.512737000 | 0.943542000  | -0.543845000 |
| H | 3.735144000  | 2.785922000  | 0.163585000  |
| H | 4.892239000  | 4.743236000  | 1.185223000  |
| H | 1.425086000  | 6.972589000  | 1.195972000  |
| H | 0.121165000  | 5.118124000  | 0.174657000  |
| H | -0.092990000 | -1.858942000 | -1.872223000 |
| H | -0.983340000 | -3.346484000 | -3.618608000 |
| H | -2.057744000 | -0.092445000 | -5.921785000 |
| H | -0.950314000 | 1.506340000  | -4.394548000 |
| H | -3.525887000 | 5.873702000  | -2.769009000 |
| H | -4.160467000 | 6.608797000  | -0.481880000 |
| H | -4.228328000 | 4.931776000  | 1.346241000  |
| C | -3.804307000 | 2.373217000  | 1.274491000  |
| C | -5.159457000 | 2.045749000  | 1.533872000  |
| C | -2.801446000 | 1.837572000  | 2.098729000  |
| C | -5.455040000 | 1.131593000  | 2.541162000  |
| C | -3.149004000 | 0.922107000  | 3.095115000  |
| C | -4.463576000 | 0.536559000  | 3.317630000  |
| H | -6.495259000 | 0.871672000  | 2.722667000  |
| H | -2.368793000 | 0.503906000  | 3.726454000  |
| C | -2.658994000 | 3.567121000  | -3.602969000 |
| C | -1.440898000 | 4.086849000  | -4.119959000 |
| C | -3.543652000 | 2.906290000  | -4.487587000 |
| C | -1.099129000 | 3.862368000  | -5.450184000 |
| C | -3.136624000 | 2.703687000  | -5.814454000 |
| C | -1.924480000 | 3.148725000  | -6.315402000 |
| H | -0.159629000 | 4.261485000  | -5.822757000 |
| H | -3.822551000 | 2.191177000  | -6.488648000 |
| C | -1.364799000 | 2.308716000  | 2.008982000  |
| H | -1.253259000 | 2.864080000  | 1.072382000  |
| C | -6.325287000 | 2.652893000  | 0.761537000  |
| H | -5.921478000 | 3.248255000  | -0.061982000 |
| C | -4.806015000 | -0.500761000 | 4.366103000  |
| H | -3.868739000 | -0.771124000 | 4.872145000  |
| C | -4.965123000 | 2.400424000  | -4.215404000 |

|   |              |              |              |
|---|--------------|--------------|--------------|
| H | -5.506969000 | 2.642452000  | -5.141651000 |
| C | -0.486515000 | 4.929488000  | -3.288097000 |
| H | -0.761681000 | 4.814865000  | -2.236365000 |
| C | -1.531965000 | 2.905954000  | -7.757448000 |
| H | -2.307779000 | 2.266278000  | -8.201884000 |
| C | -1.495969000 | 4.220439000  | -8.548756000 |
| H | -1.268947000 | 4.031150000  | -9.603718000 |
| H | -2.456472000 | 4.741842000  | -8.488558000 |
| H | -0.724395000 | 4.891346000  | -8.154203000 |
| C | -0.192207000 | 2.166212000  | -7.863097000 |
| H | -0.208466000 | 1.229208000  | -7.296561000 |
| H | 0.036931000  | 1.932623000  | -8.908484000 |
| H | 0.628166000  | 2.778290000  | -7.471850000 |
| C | -5.368381000 | -1.770384000 | 3.711477000  |
| H | -5.552250000 | -2.547141000 | 4.462228000  |
| H | -6.318717000 | -1.558945000 | 3.207174000  |
| H | -4.672455000 | -2.165224000 | 2.963892000  |
| C | -5.771648000 | 0.046098000  | 5.424345000  |
| H | -6.741804000 | 0.297539000  | 4.981321000  |
| H | -5.948087000 | -0.699268000 | 6.207711000  |
| H | -5.371411000 | 0.951252000  | 5.891824000  |
| C | -0.355598000 | 1.157100000  | 2.014086000  |
| H | -0.375770000 | 0.609596000  | 2.962219000  |
| H | -0.561867000 | 0.439194000  | 1.212140000  |
| H | 0.663479000  | 1.536143000  | 1.887475000  |
| C | -1.066646000 | 3.295533000  | 3.149274000  |
| H | -1.761079000 | 4.142087000  | 3.126518000  |
| H | -1.165020000 | 2.804937000  | 4.124656000  |
| H | -0.045653000 | 3.684787000  | 3.061095000  |
| C | -7.261745000 | 1.602440000  | 0.147801000  |
| H | -6.731236000 | 0.928807000  | -0.532341000 |
| H | -7.750585000 | 0.993654000  | 0.916180000  |
| H | -8.050080000 | 2.099703000  | -0.428198000 |
| C | -7.123526000 | 3.606244000  | 1.664141000  |
| H | -7.918004000 | 4.100454000  | 1.093714000  |
| H | -7.589674000 | 3.060932000  | 2.492662000  |
| H | -6.479226000 | 4.377771000  | 2.096418000  |
| C | -5.767733000 | 3.049039000  | -3.088864000 |
| H | -5.737482000 | 4.140983000  | -3.137040000 |
| H | -6.813110000 | 2.731072000  | -3.174532000 |
| H | -5.408125000 | 2.745352000  | -2.104891000 |
| C | -4.991775000 | 0.870398000  | -4.082540000 |
| H | -6.023994000 | 0.517303000  | -3.974821000 |
| H | -4.553097000 | 0.380762000  | -4.957554000 |
| H | -4.428832000 | 0.545461000  | -3.204984000 |
| C | 0.976941000  | 4.488650000  | -3.444813000 |
| H | 1.595579000  | 4.963774000  | -2.675875000 |
| H | 1.089557000  | 3.403560000  | -3.352910000 |
| H | 1.385300000  | 4.783337000  | -4.417742000 |
| C | -0.608685000 | 6.417052000  | -3.655581000 |
| H | -0.353981000 | 6.576300000  | -4.709870000 |
| H | -1.622727000 | 6.792707000  | -3.495578000 |
| H | 0.077743000  | 7.015796000  | -3.045773000 |

**TS4** from **INT2** to product **3**

122

symmetry c1

|   |              |              |              |
|---|--------------|--------------|--------------|
| C | -2.558149000 | -2.909786000 | 1.718313000  |
| C | -1.764471000 | -4.054880000 | 1.799497000  |
| C | -0.476470000 | -4.061686000 | 1.270163000  |
| C | 0.004649000  | -2.872061000 | 0.759723000  |
| C | -0.727453000 | -1.681711000 | 0.683354000  |
| C | -2.052013000 | -1.749711000 | 1.154977000  |
| B | 0.012903000  | -0.395644000 | 0.238845000  |
| N | 1.442074000  | -0.663332000 | 0.351952000  |
| C | 1.941986000  | -1.974847000 | 0.515318000  |
| N | 2.272342000  | 0.352271000  | 0.726700000  |
| C | 3.316424000  | 0.030132000  | 1.434766000  |
| N | 3.568539000  | -1.236474000 | 1.947705000  |
| N | 2.875845000  | -2.206775000 | 1.437152000  |
| C | 4.236669000  | 1.108721000  | 1.827802000  |
| C | 5.430500000  | 0.823380000  | 2.492882000  |
| C | 6.269558000  | 1.878214000  | 2.835868000  |
| N | 6.002945000  | 3.160796000  | 2.573337000  |
| C | 4.851712000  | 3.421807000  | 1.940434000  |
| C | 3.944392000  | 2.448054000  | 1.549632000  |
| C | 1.480843000  | -3.070374000 | -0.349036000 |

|   |              |              |              |
|---|--------------|--------------|--------------|
| C | 2.074945000  | -4.378302000 | -0.204865000 |
| C | 1.805198000  | -5.348987000 | -1.133894000 |
| N | 1.078584000  | -5.172795000 | -2.261344000 |
| C | 0.646333000  | -3.923642000 | -2.475545000 |
| C | 0.827537000  | -2.859943000 | -1.614384000 |
| C | -0.385761000 | 1.076868000  | -0.145293000 |
| C | 0.069649000  | 1.608065000  | -1.380723000 |
| C | 0.039772000  | 2.984853000  | -1.600757000 |
| C | -0.450955000 | 3.850648000  | -0.633177000 |
| C | -0.997609000 | 3.332464000  | 0.532660000  |
| C | -1.003966000 | 1.956998000  | 0.775965000  |
| H | -3.574005000 | -2.922868000 | 2.101722000  |
| H | -2.145412000 | -4.955427000 | 2.273759000  |
| H | 0.128428000  | -4.961578000 | 1.266738000  |
| H | -2.671365000 | -0.861870000 | 1.106000000  |
| H | 5.692457000  | -0.199914000 | 2.737228000  |
| H | 7.207944000  | 1.678299000  | 3.352201000  |
| H | 4.643153000  | 4.471618000  | 1.736830000  |
| H | 3.022680000  | 2.720092000  | 1.044731000  |
| H | 2.713804000  | -4.587448000 | 0.645482000  |
| H | 2.220121000  | -6.346977000 | -0.992332000 |
| H | 0.107548000  | -3.748158000 | -3.406914000 |
| H | 0.392092000  | -1.897716000 | -1.858442000 |
| H | 0.374548000  | 3.372295000  | -2.558563000 |
| H | -0.448332000 | 4.923167000  | -0.806551000 |
| H | -1.434533000 | 3.994946000  | 1.274532000  |
| C | -1.742940000 | 1.472017000  | 1.985861000  |
| C | -3.155139000 | 1.411857000  | 1.932242000  |
| C | -1.077214000 | 1.111467000  | 3.168682000  |
| C | -3.856529000 | 0.959246000  | 3.047440000  |
| C | -1.824203000 | 0.662055000  | 4.259873000  |
| C | -3.209377000 | 0.568915000  | 4.218219000  |
| H | -4.940904000 | 0.903699000  | 2.996751000  |
| H | -1.310533000 | 0.380154000  | 5.175988000  |
| C | 0.508982000  | 0.716368000  | -2.506911000 |
| C | 1.880720000  | 0.578235000  | -2.823559000 |
| C | -0.450824000 | 0.051315000  | -3.310640000 |
| C | 2.270726000  | -0.299182000 | -3.833696000 |
| C | 0.001547000  | -0.815549000 | -4.310219000 |
| C | 1.349321000  | -1.034407000 | -4.569969000 |
| H | 3.329312000  | -0.409211000 | -4.049014000 |
| H | -0.737568000 | -1.339181000 | -4.915843000 |
| C | 0.423601000  | 1.266351000  | 3.314822000  |
| H | 0.843304000  | 1.428884000  | 2.315912000  |
| C | -3.938818000 | 1.834514000  | 0.698267000  |
| H | -3.238618000 | 1.889265000  | -0.141766000 |
| C | -3.988051000 | 0.040245000  | 5.405068000  |
| H | -3.268705000 | -0.112983000 | 6.221606000  |
| C | -1.970403000 | 0.204553000  | -3.229804000 |
| H | -2.329262000 | -0.220684000 | -4.176762000 |
| C | 2.962784000  | 1.390488000  | -2.133517000 |
| H | 2.547730000  | 1.786094000  | -1.201731000 |
| C | 1.779117000  | -1.976659000 | -5.674988000 |
| H | 0.918906000  | -2.623813000 | -5.899442000 |
| C | 2.114165000  | -1.183083000 | -6.947371000 |
| H | 2.372495000  | -1.859489000 | -7.769777000 |
| H | 1.268790000  | -0.562071000 | -7.260563000 |
| H | 2.970119000  | -0.521623000 | -6.769851000 |
| C | 2.951276000  | -2.876520000 | -5.270925000 |
| H | 2.741396000  | -3.415963000 | -4.342134000 |
| H | 3.150557000  | -3.612565000 | -6.056984000 |
| H | 3.869140000  | -2.295760000 | -5.128276000 |
| C | -4.621495000 | -1.319334000 | 5.079084000  |
| H | -5.139166000 | -1.727377000 | 5.954468000  |
| H | -5.354405000 | -1.222787000 | 4.269357000  |
| H | -3.859258000 | -2.037969000 | 4.760516000  |
| C | -5.045670000 | 1.037360000  | 5.892606000  |
| H | -5.820714000 | 1.197012000  | 5.134683000  |
| H | -5.538873000 | 0.662632000  | 6.796196000  |
| H | -4.595328000 | 2.008196000  | 6.122265000  |
| C | 1.089626000  | 0.024866000  | 3.915048000  |
| H | 0.774734000  | -0.141670000 | 4.950460000  |
| H | 0.844322000  | -0.877784000 | 3.343774000  |
| H | 2.178200000  | 0.142131000  | 3.927154000  |
| C | 0.751792000  | 2.516144000  | 4.145550000  |
| H | 0.313091000  | 3.412907000  | 3.695413000  |
| H | 0.357264000  | 2.422463000  | 5.164017000  |
| H | 1.836935000  | 2.657738000  | 4.209128000  |

|   |              |              |              |
|---|--------------|--------------|--------------|
| C | -5.043477000 | 0.841527000  | 0.310971000  |
| H | -4.663935000 | -0.181609000 | 0.228000000  |
| H | -5.863336000 | 0.840995000  | 1.037155000  |
| H | -5.468868000 | 1.121969000  | -0.658812000 |
| C | -4.545427000 | 3.231690000  | 0.896766000  |
| H | -5.074894000 | 3.554242000  | -0.006988000 |
| H | -5.260911000 | 3.221494000  | 1.727291000  |
| H | -3.776605000 | 3.974273000  | 1.126975000  |
| C | -2.489641000 | 1.646935000  | -3.197563000 |
| H | -1.993554000 | 2.266823000  | -3.951699000 |
| H | -3.565075000 | 1.647590000  | -3.409761000 |
| H | -2.341955000 | 2.118662000  | -2.223672000 |
| C | -2.613340000 | -0.629729000 | -2.116836000 |
| H | -3.700744000 | -0.660039000 | -2.251672000 |
| H | -2.239270000 | -1.659277000 | -2.113506000 |
| H | -2.410024000 | -0.191993000 | -1.137503000 |
| C | 4.206168000  | 0.557811000  | -1.788465000 |
| H | 4.847583000  | 1.109466000  | -1.093020000 |
| H | 3.942787000  | -0.400918000 | -1.330121000 |
| H | 4.805882000  | 0.343284000  | -2.679633000 |
| C | 3.380617000  | 2.580649000  | -3.012547000 |
| H | 3.803171000  | 2.226079000  | -3.960025000 |
| H | 2.533701000  | 3.230842000  | -3.248503000 |
| H | 4.143231000  | 3.180716000  | -2.502697000 |

Product 3

122

symmetry c1

|   |              |              |              |
|---|--------------|--------------|--------------|
| C | -4.306072000 | -1.713519000 | -0.621583000 |
| C | -3.208217000 | -2.533415000 | -0.886443000 |
| C | -1.959355000 | -1.977605000 | -1.157763000 |
| C | -1.841819000 | -0.599343000 | -1.146907000 |
| C | -2.937463000 | 0.253764000  | -0.917442000 |
| C | -4.177855000 | -0.329625000 | -0.644960000 |
| B | -2.432462000 | 1.726808000  | -0.977986000 |
| N | -0.984490000 | 1.557651000  | -1.070389000 |
| C | -0.557070000 | 0.167657000  | -1.327147000 |
| N | -0.071399000 | 2.465946000  | -0.766204000 |
| C | 1.118908000  | 2.002024000  | -0.462706000 |
| N | 1.290552000  | 0.674579000  | -0.031872000 |
| N | 0.445395000  | -0.207782000 | -0.289870000 |
| C | 2.201822000  | 2.938560000  | -0.154609000 |
| C | 3.498313000  | 2.479214000  | 0.089021000  |
| C | 4.497664000  | 3.406271000  | 0.359696000  |
| N | 4.297706000  | 4.726715000  | 0.413801000  |
| C | 3.049242000  | 5.155620000  | 0.187714000  |
| C | 1.981075000  | 4.319255000  | -0.099456000 |
| C | 0.021790000  | 0.040068000  | -2.732523000 |
| C | 1.348841000  | -0.290532000 | -2.995153000 |
| C | 1.766034000  | -0.368412000 | -4.322922000 |
| N | 0.965161000  | -0.160633000 | -5.369642000 |
| C | -0.309675000 | 0.146205000  | -5.102814000 |
| C | -0.822569000 | 0.263652000  | -3.819649000 |
| C | -3.028237000 | 3.180147000  | -0.979004000 |
| C | -2.901492000 | 4.052742000  | -2.087333000 |
| C | -3.187685000 | 5.410465000  | -1.921634000 |
| C | -3.619557000 | 5.914793000  | -0.703057000 |
| C | -3.845320000 | 5.046073000  | 0.356428000  |
| C | -3.577303000 | 3.684463000  | 0.222376000  |
| H | -5.268571000 | -2.161485000 | -0.391384000 |
| H | -3.324032000 | -3.613430000 | -0.866215000 |
| H | -1.094846000 | -2.608096000 | -1.345334000 |
| H | -5.035832000 | 0.294491000  | -0.426276000 |
| H | 3.719526000  | 1.417051000  | 0.077044000  |
| H | 5.515826000  | 3.066204000  | 0.546777000  |
| H | 2.895219000  | 6.233032000  | 0.240751000  |
| H | 0.989881000  | 4.725986000  | -0.273392000 |
| H | 2.056156000  | -0.491600000 | -2.198326000 |
| H | 2.802965000  | -0.614860000 | -4.549286000 |
| H | -0.961791000 | 0.309697000  | -5.958993000 |
| H | -1.866344000 | 0.531860000  | -3.678405000 |
| H | -3.104579000 | 6.067767000  | -2.782371000 |
| H | -3.821636000 | 6.976555000  | -0.593178000 |
| H | -4.234059000 | 5.420079000  | 1.298842000  |
| C | -3.922846000 | 2.729231000  | 1.321647000  |
| C | -5.253790000 | 2.270904000  | 1.438521000  |
| C | -2.934094000 | 2.251382000  | 2.200962000  |

|   |              |              |              |
|---|--------------|--------------|--------------|
| C | -5.542155000 | 1.278845000  | 2.372966000  |
| C | -3.270685000 | 1.251539000  | 3.115443000  |
| C | -4.558874000 | 0.735067000  | 3.197698000  |
| H | -6.560393000 | 0.906682000  | 2.448795000  |
| H | -2.506912000 | 0.856742000  | 3.780052000  |
| C | -2.575954000 | 3.598871000  | -3.484935000 |
| C | -1.303628000 | 3.853766000  | -4.038703000 |
| C | -3.590361000 | 3.059785000  | -4.320414000 |
| C | -1.048190000 | 3.538473000  | -5.376028000 |
| C | -3.263480000 | 2.728904000  | -5.636521000 |
| C | -2.007527000 | 2.961889000  | -6.192517000 |
| H | -0.062244000 | 3.745521000  | -5.777265000 |
| H | -4.041775000 | 2.303390000  | -6.269213000 |
| C | -1.552830000 | 2.879941000  | 2.228926000  |
| H | -1.332561000 | 3.262151000  | 1.225188000  |
| C | -6.381823000 | 2.878677000  | 0.617400000  |
| H | -5.940696000 | 3.340774000  | -0.273564000 |
| C | -4.878269000 | -0.401617000 | 4.145947000  |
| H | -3.965787000 | -0.608058000 | 4.722286000  |
| C | -5.063750000 | 2.871265000  | -3.953821000 |
| H | -5.544496000 | 2.596575000  | -4.902012000 |
| C | -0.183465000 | 4.509436000  | -3.250621000 |
| H | -0.439681000 | 4.446667000  | -2.188094000 |
| C | -1.767536000 | 2.648629000  | -7.658112000 |
| H | -2.239245000 | 1.674005000  | -7.858966000 |
| C | -2.474719000 | 3.693672000  | -8.538026000 |
| H | -2.351563000 | 3.453819000  | -9.600046000 |
| H | -3.545372000 | 3.746041000  | -8.318018000 |
| H | -2.046525000 | 4.686597000  | -8.358787000 |
| C | -0.291199000 | 2.547130000  | -8.044426000 |
| H | 0.259845000  | 1.849840000  | -7.405256000 |
| H | -0.200131000 | 2.202528000  | -9.079499000 |
| H | 0.200880000  | 3.524888000  | -7.985101000 |
| C | -5.237024000 | -1.673435000 | 3.364222000  |
| H | -5.403541000 | -2.514980000 | 4.046050000  |
| H | -6.154047000 | -1.524312000 | 2.782168000  |
| H | -4.437618000 | -1.942052000 | 2.665949000  |
| C | -5.987586000 | -0.034362000 | 5.138978000  |
| H | -6.938390000 | 0.142305000  | 4.623784000  |
| H | -6.146215000 | -0.847329000 | 5.856063000  |
| H | -5.734019000 | 0.873020000  | 5.696289000  |
| C | -0.439895000 | 1.905458000  | 2.618685000  |
| H | -0.478356000 | 1.653587000  | 3.684366000  |
| H | -0.499990000 | 0.972263000  | 2.050375000  |
| H | 0.539181000  | 2.359273000  | 2.431721000  |
| C | -1.557209000 | 4.089287000  | 3.179073000  |
| H | -2.294688000 | 4.835991000  | 2.869316000  |
| H | -1.801851000 | 3.772143000  | 4.199532000  |
| H | -0.570153000 | 4.565541000  | 3.193372000  |
| C | -7.437861000 | 1.872618000  | 0.144857000  |
| H | -6.998367000 | 1.024703000  | -0.388691000 |
| H | -8.027951000 | 1.479168000  | 0.979485000  |
| H | -8.135703000 | 2.368537000  | -0.538501000 |
| C | -7.070784000 | 3.989219000  | 1.428797000  |
| H | -7.850388000 | 4.476567000  | 0.832263000  |
| H | -7.538002000 | 3.566944000  | 2.326125000  |
| H | -6.358150000 | 4.752075000  | 1.752127000  |
| C | -5.773951000 | 4.146662000  | -3.478546000 |
| H | -5.543093000 | 4.998002000  | -4.127480000 |
| H | -6.858242000 | 3.986452000  | -3.499678000 |
| H | -5.496442000 | 4.414284000  | -2.456326000 |
| C | -5.332185000 | 1.716797000  | -2.988184000 |
| H | -6.408962000 | 1.516329000  | -2.933258000 |
| H | -4.828206000 | 0.797935000  | -3.304327000 |
| H | -4.988029000 | 1.967427000  | -1.983087000 |
| C | 1.163457000  | 3.802179000  | -3.464261000 |
| H | 1.906415000  | 4.181827000  | -2.756399000 |
| H | 1.078530000  | 2.719815000  | -3.328321000 |
| H | 1.556676000  | 3.982640000  | -4.470229000 |
| C | -0.044879000 | 5.994477000  | -3.620894000 |
| H | 0.193013000  | 6.105244000  | -4.685340000 |
| H | -0.964963000 | 6.551383000  | -3.422715000 |
| H | 0.765152000  | 6.455210000  | -3.043234000 |

## b. Cartesian coordinates for Diels-Alder reactions of 1' with PTAD and 4,4'-bptz

Cartesian coordinates are given in Å and were computed at the M06-2X/6-311+G\*\* level of theory.

1'  
22  
symmetry c1

|   |              |              |              |
|---|--------------|--------------|--------------|
| B | -0.222827000 | 0.000000000  | -0.000001000 |
| C | -1.531459000 | 0.698430000  | 0.000015000  |
| C | -2.726062000 | 1.440275000  | -0.000022000 |
| C | -2.726062000 | -1.440275000 | 0.000021000  |
| C | -3.893991000 | 0.711105000  | -0.000023000 |
| C | -3.893992000 | -0.711105000 | 0.000027000  |
| C | -1.531459000 | -0.698430000 | -0.000020000 |
| H | -4.849704000 | 1.223934000  | 0.000081000  |
| H | -4.849704000 | -1.223933000 | -0.000075000 |
| H | -2.747148000 | 2.524257000  | 0.000122000  |
| H | -2.747149000 | -2.524257000 | -0.000122000 |
| C | 1.314064000  | 0.000000000  | 0.000000000  |
| C | 2.031924000  | 1.203994000  | -0.000037000 |
| C | 2.031924000  | -1.203994000 | 0.000036000  |
| C | 3.421529000  | 1.207049000  | 0.000033000  |
| H | 1.488203000  | 2.142616000  | 0.000012000  |
| C | 3.421529000  | -1.207049000 | -0.000032000 |
| H | 1.488203000  | -2.142617000 | -0.000013000 |
| C | 4.115775000  | 0.000000000  | 0.000001000  |
| H | 3.964650000  | 2.144772000  | -0.000084000 |
| H | 3.964650000  | -2.144772000 | 0.000086000  |
| H | 5.199816000  | 0.000000000  | 0.000001000  |

PTAD  
18  
symmetry c1

|   |              |              |              |
|---|--------------|--------------|--------------|
| N | 2.977886000  | -0.597881000 | -0.135379000 |
| N | 2.977759000  | 0.598168000  | 0.135591000  |
| C | 1.569275000  | -1.096095000 | -0.245515000 |
| C | 1.569131000  | 1.096142000  | 0.245484000  |
| N | 0.760078000  | -0.000003000 | -0.000238000 |
| O | 1.281716000  | 2.217494000  | 0.492005000  |
| O | 1.282090000  | -2.217536000 | -0.491850000 |
| C | -0.668484000 | -0.000069000 | -0.000201000 |
| C | -1.349547000 | 1.075271000  | -0.560676000 |
| C | -1.349466000 | -1.075371000 | 0.560466000  |
| C | -2.738799000 | 1.070361000  | -0.551297000 |
| H | -0.801119000 | 1.904977000  | -0.986814000 |
| C | -2.738728000 | -1.070447000 | 0.551408000  |
| H | -0.800991000 | -1.905067000 | 0.986551000  |
| C | -3.434826000 | -0.000042000 | 0.000115000  |
| H | -3.276038000 | 1.906505000  | -0.981311000 |
| H | -3.275880000 | -1.906566000 | 0.981579000  |
| H | -4.517822000 | -0.000004000 | 0.000244000  |

TS Diels Alder 1' + PTAD at positions 3,6  
40  
symmetry c1

|   |              |              |              |
|---|--------------|--------------|--------------|
| C | -0.241268000 | 1.003712000  | 1.615989000  |
| C | 0.601071000  | 1.492754000  | 0.568806000  |
| C | 1.838800000  | 0.781077000  | 0.434027000  |
| C | -0.246938000 | -0.346992000 | 1.865883000  |
| C | 1.834513000  | -0.575182000 | 0.686238000  |
| C | 0.592142000  | -1.183567000 | 1.065098000  |
| N | -0.292128000 | 0.500945000  | -0.935771000 |
| N | -0.294445000 | -0.789699000 | -0.696462000 |
| C | -1.645792000 | -1.213059000 | -0.389439000 |
| C | -1.642315000 | 1.010602000  | -0.801849000 |
| N | -2.450431000 | -0.084758000 | -0.513948000 |
| O | -1.977130000 | -2.332912000 | -0.139413000 |
| O | -1.969731000 | 2.146605000  | -0.970107000 |
| B | 3.102828000  | 0.043037000  | 0.260111000  |
| H | -0.985118000 | 1.655502000  | 2.058482000  |

|   |              |              |              |
|---|--------------|--------------|--------------|
| H | 0.469567000  | 2.499704000  | 0.192601000  |
| H | -0.997240000 | -0.792735000 | 2.507857000  |
| H | 0.453269000  | -2.257495000 | 1.074275000  |
| C | -3.858224000 | -0.047906000 | -0.300794000 |
| C | -4.428599000 | 1.039812000  | 0.355019000  |
| C | -4.644671000 | -1.104078000 | -0.753090000 |
| C | -5.803397000 | 1.065940000  | 0.554952000  |
| C | -6.016342000 | -1.068124000 | -0.536365000 |
| C | -6.599422000 | 0.014285000  | 0.114045000  |
| H | -3.805466000 | 1.859655000  | 0.686148000  |
| H | -4.183655000 | -1.944085000 | -1.254704000 |
| H | -6.251165000 | 1.913796000  | 1.058751000  |
| H | -6.630439000 | -1.890010000 | -0.883478000 |
| H | -7.670210000 | 0.038905000  | 0.275084000  |
| C | 4.614872000  | -0.008933000 | 0.003826000  |
| C | 5.318236000  | -1.216270000 | 0.111475000  |
| C | 5.321572000  | 1.149724000  | -0.345397000 |
| C | 6.687048000  | -1.265528000 | -0.121646000 |
| C | 6.690288000  | 1.104862000  | -0.579926000 |
| C | 7.372351000  | -0.103833000 | -0.467479000 |
| H | 4.782092000  | -2.120399000 | 0.378983000  |
| H | 4.787978000  | 2.089861000  | -0.434083000 |
| H | 7.220437000  | -2.204784000 | -0.036024000 |
| H | 7.226115000  | 2.006883000  | -0.850641000 |
| H | 8.440060000  | -0.140730000 | -0.650624000 |

**Product Diels Alder 1' + PTAD at positions 3,6**

40

symmetry c1

|   |              |              |              |
|---|--------------|--------------|--------------|
| C | -0.144210000 | -1.192955000 | 1.967452000  |
| C | -0.561945000 | -1.469874000 | 0.525536000  |
| C | -1.880220000 | -0.786382000 | 0.309705000  |
| C | -0.140640000 | 0.099794000  | 2.293717000  |
| C | -1.876969000 | 0.536521000  | 0.643585000  |
| C | -0.555722000 | 1.029747000  | 1.156301000  |
| N | 0.377484000  | -0.663036000 | -0.321471000 |
| N | 0.381012000  | 0.716672000  | 0.027536000  |
| C | 1.706706000  | 1.129400000  | 0.164534000  |
| C | 1.701489000  | -1.096966000 | -0.401680000 |
| N | 2.489884000  | 0.046491000  | -0.247424000 |
| O | 2.077064000  | 2.207633000  | 0.540761000  |
| O | 2.062566000  | -2.227292000 | -0.587407000 |
| B | -3.136973000 | -0.038295000 | 0.146037000  |
| H | 0.189615000  | -1.993326000 | 2.614512000  |
| H | -0.470293000 | -2.504633000 | 0.211042000  |
| H | 0.197719000  | 0.496201000  | 3.241890000  |
| H | -0.458319000 | 2.089166000  | 1.371026000  |
| C | 3.909111000  | 0.090937000  | -0.379567000 |
| C | 4.685536000  | -0.980094000 | 0.053383000  |
| C | 4.497374000  | 1.218843000  | -0.945911000 |
| C | 6.066361000  | -0.917121000 | -0.094207000 |
| C | 5.878888000  | 1.272152000  | -1.074569000 |
| C | 6.666409000  | 0.205354000  | -0.653468000 |
| H | 4.212653000  | -1.852296000 | 0.482399000  |
| H | 3.878212000  | 2.046278000  | -1.266204000 |
| H | 6.673365000  | -1.751632000 | 0.235009000  |
| H | 6.338943000  | 2.150706000  | -1.510014000 |
| H | 7.743337000  | 0.249361000  | -0.760976000 |
| C | -4.628282000 | 0.055129000  | -0.210966000 |
| C | -5.321542000 | 1.265640000  | -0.080068000 |
| C | -5.324809000 | -1.069127000 | -0.673208000 |
| C | -6.670903000 | 1.351397000  | -0.400834000 |
| C | -6.674168000 | -0.987870000 | -0.995154000 |
| C | -7.346778000 | 0.223453000  | -0.858273000 |
| H | -4.793390000 | 2.144068000  | 0.274907000  |
| H | -4.799194000 | -2.011852000 | -0.780828000 |
| H | -7.196311000 | 2.293258000  | -0.296258000 |
| H | -7.202124000 | -1.864043000 | -1.352449000 |
| H | -8.399170000 | 0.288742000  | -1.109415000 |

**TS Diels Alder 1' + PTAD at positions 1,4**

40

symmetry c1

|   |              |             |              |
|---|--------------|-------------|--------------|
| N | 0.577404000  | 1.701243000 | -1.094834000 |
| C | 0.085777000  | 3.031292000 | -0.085959000 |
| C | -1.365557000 | 3.109664000 | -0.237233000 |
| C | -1.993580000 | 2.003373000 | 0.213834000  |
| C | -1.205140000 | 0.972585000 | 0.876804000  |



|   |              |              |              |
|---|--------------|--------------|--------------|
| N | -0.185140000 | 0.630568000  | -0.975015000 |
| B | -2.621166000 | 0.661988000  | 0.473012000  |
| C | -0.083416000 | 1.357892000  | 1.661825000  |
| C | 0.567360000  | 2.449174000  | 1.184366000  |
| C | 1.955602000  | 1.376222000  | -0.771909000 |
| C | 0.652281000  | -0.472622000 | -0.614750000 |
| N | 1.966206000  | 0.015411000  | -0.535641000 |
| O | 2.867921000  | 2.148806000  | -0.800528000 |
| O | 0.293441000  | -1.602671000 | -0.470660000 |
| C | 3.113520000  | -0.753588000 | -0.188910000 |
| C | 4.083234000  | -0.204407000 | 0.645462000  |
| C | 5.201314000  | -0.960273000 | 0.975517000  |
| C | 5.344940000  | -2.254423000 | 0.486918000  |
| C | 4.366190000  | -2.793029000 | -0.341722000 |
| C | 3.248241000  | -2.045358000 | -0.689958000 |
| C | -3.731397000 | -0.357962000 | 0.270795000  |
| C | -3.492074000 | -1.712522000 | 0.551036000  |
| C | -4.491233000 | -2.658660000 | 0.364890000  |
| C | -5.744389000 | -2.259593000 | -0.093724000 |
| C | -5.999949000 | -0.919198000 | -0.376974000 |
| C | -4.996586000 | 0.023627000  | -0.201972000 |
| H | 0.676693000  | 3.848417000  | -0.482175000 |
| H | -1.826219000 | 3.939299000  | -0.759906000 |
| H | 0.261949000  | 0.788461000  | 2.516051000  |
| H | 1.499513000  | 2.814338000  | 1.597675000  |
| H | 3.967535000  | 0.805259000  | 1.016538000  |
| H | 5.960674000  | -0.533782000 | 1.619475000  |
| H | 6.216750000  | -2.840782000 | 0.750227000  |
| H | 4.472184000  | -3.800295000 | -0.725571000 |
| H | 2.480306000  | -2.458164000 | -1.329894000 |
| H | -2.509614000 | -2.013624000 | 0.898162000  |
| H | -4.297921000 | -3.703766000 | 0.574710000  |
| H | -6.526022000 | -2.997449000 | -0.234880000 |
| H | -6.976144000 | -0.617778000 | -0.737490000 |
| H | -5.184876000 | 1.067136000  | -0.430060000 |

**Product Diels Alder 1' + PTAD at positions 1,4**

40

symmetry c1

|   |              |              |              |
|---|--------------|--------------|--------------|
| N | 0.667455000  | 1.696289000  | -0.746898000 |
| C | 0.081940000  | 2.899981000  | -0.070138000 |
| C | -1.340837000 | 2.979195000  | -0.631788000 |
| C | -2.039498000 | 1.886877000  | -0.355036000 |
| C | -1.208499000 | 0.832125000  | 0.447196000  |
| N | -0.090844000 | 0.519264000  | -0.455727000 |
| B | -2.660621000 | 0.566535000  | -0.029107000 |
| C | -0.653637000 | 1.458989000  | 1.697130000  |
| C | 0.044983000  | 2.561242000  | 1.414711000  |
| C | 2.013280000  | 1.413362000  | -0.534926000 |
| C | 0.799296000  | -0.494190000 | -0.101036000 |
| N | 2.081982000  | 0.036886000  | -0.294671000 |
| O | 2.920035000  | 2.202010000  | -0.579434000 |
| O | 0.511899000  | -1.598206000 | 0.271612000  |
| C | 3.285965000  | -0.712158000 | -0.154990000 |
| C | 4.392581000  | -0.149145000 | 0.474956000  |
| C | 5.558979000  | -0.896607000 | 0.590640000  |
| C | 5.618054000  | -2.195076000 | 0.097407000  |
| C | 4.502457000  | -2.749052000 | -0.522492000 |
| C | 3.334604000  | -2.010165000 | -0.657663000 |
| C | -3.828106000 | -0.397587000 | -0.022112000 |
| C | -3.647940000 | -1.687401000 | 0.506421000  |
| C | -4.697434000 | -2.596060000 | 0.516733000  |
| C | -5.937745000 | -2.222509000 | 0.004361000  |
| C | -6.134641000 | -0.947333000 | -0.524773000 |
| C | -5.084299000 | -0.041929000 | -0.541524000 |
| H | 0.715598000  | 3.744886000  | -0.322354000 |
| H | -1.660593000 | 3.828321000  | -1.226236000 |
| H | -0.765515000 | 1.025699000  | 2.683032000  |
| H | 0.608707000  | 3.147633000  | 2.128984000  |
| H | 4.342144000  | 0.862669000  | 0.851723000  |
| H | 6.423730000  | -0.458163000 | 1.073728000  |
| H | 6.528743000  | -2.773344000 | 0.195470000  |
| H | 4.539465000  | -3.760566000 | -0.908198000 |
| H | 2.460933000  | -2.435634000 | -1.133150000 |
| H | -2.672617000 | -1.965326000 | 0.892835000  |
| H | -4.554005000 | -3.591335000 | 0.919468000  |
| H | -6.758223000 | -2.931097000 | 0.014148000  |
| H | -7.103066000 | -0.669771000 | -0.923018000 |

H -5.224836000 0.950506000 -0.955717000

**4,4'-bptz**

27

symmetry c1

|   |              |              |              |
|---|--------------|--------------|--------------|
| N | -0.627453000 | -1.184083000 | 0.010803000  |
| C | -1.318796000 | -0.007741000 | 0.100942000  |
| N | 0.644197000  | -1.168307000 | 0.036663000  |
| C | 1.321687000  | 0.033839000  | 0.116892000  |
| N | 0.694254000  | 1.176468000  | 0.316154000  |
| N | -0.620283000 | 1.097638000  | 0.324005000  |
| C | 2.781114000  | 0.007774000  | 0.021631000  |
| C | 3.518983000  | 1.189078000  | 0.125671000  |
| C | 4.901016000  | 1.100759000  | 0.021463000  |
| N | 5.551268000  | -0.046411000 | -0.172928000 |
| C | 4.837751000  | -1.164636000 | -0.270735000 |
| C | 3.449105000  | -1.200487000 | -0.180535000 |
| C | -2.770400000 | -0.002035000 | -0.000989000 |
| C | -3.472438000 | -1.181582000 | 0.250400000  |
| C | -4.861600000 | -1.133706000 | 0.168071000  |
| N | -5.539150000 | -0.033540000 | -0.146956000 |
| C | -4.857613000 | 1.082127000  | -0.403094000 |
| C | -3.471898000 | 1.157736000  | -0.345382000 |
| H | 3.039421000  | 2.146086000  | 0.283811000  |
| H | 5.513004000  | 1.992761000  | 0.097445000  |
| H | 5.396958000  | -2.080350000 | -0.428263000 |
| H | 2.914607000  | -2.136963000 | -0.264430000 |
| H | -2.958405000 | -2.097300000 | 0.511250000  |
| H | -5.450340000 | -2.022996000 | 0.364179000  |
| H | -5.442798000 | 1.953434000  | -0.675618000 |
| H | -2.980221000 | 2.086262000  | -0.615033000 |
| H | -1.093517000 | 1.979942000  | 0.526461000  |

**TS Diels-Alder 1' + 4,4'-bptz at bond a**

48

symmetry c1

|   |              |              |              |
|---|--------------|--------------|--------------|
| C | 0.725049000  | -1.895250000 | 2.898349000  |
| C | -0.724187000 | -1.895537000 | 2.898359000  |
| C | -1.440970000 | -1.173589000 | 2.010085000  |
| C | -0.726791000 | -0.370183000 | 1.036593000  |
| C | 0.727058000  | -0.369968000 | 1.036487000  |
| C | 1.441535000  | -1.173089000 | 2.010012000  |
| C | 1.245940000  | -0.953429000 | -0.785019000 |
| C | 2.730296000  | -0.932727000 | -0.784317000 |
| B | -0.000135000 | 0.945603000  | 0.879689000  |
| C | -1.245591000 | -0.953759000 | -0.785102000 |
| N | -0.630909000 | -0.031763000 | -1.635495000 |
| N | -0.631862000 | -2.203806000 | -0.731100000 |
| C | -2.729939000 | -0.933358000 | -0.784403000 |
| N | 0.631058000  | -0.031608000 | -1.635504000 |
| N | 0.632521000  | -2.203650000 | -0.731075000 |
| C | 3.416909000  | 0.234109000  | -1.109779000 |
| C | 4.805616000  | 0.219687000  | -1.057375000 |
| N | 5.524932000  | -0.848186000 | -0.710969000 |
| C | -3.466533000 | -2.057886000 | -0.423372000 |
| C | -4.854173000 | -1.959731000 | -0.406802000 |
| N | -5.524593000 | -0.849403000 | -0.710961000 |
| C | 4.854768000  | -1.958775000 | -0.407204000 |
| C | 3.467147000  | -2.057231000 | -0.423749000 |
| C | -4.805526000 | 0.218492000  | -1.057812000 |
| C | -3.416823000 | 0.233204000  | -1.110284000 |
| H | 1.238743000  | -2.479410000 | 3.653058000  |
| H | -1.237638000 | -2.479965000 | 3.653026000  |
| H | -2.524910000 | -1.183151000 | 2.013272000  |
| H | 2.525482000  | -1.182253000 | 2.013176000  |
| H | 2.878122000  | 1.123194000  | -1.412964000 |
| H | 5.369065000  | 1.112719000  | -1.309211000 |
| H | -2.968273000 | -2.985320000 | -0.171635000 |
| H | -5.455927000 | -2.821004000 | -0.133946000 |
| H | 5.456723000  | -2.820020000 | -0.134704000 |
| H | 2.969104000  | -2.984865000 | -0.172326000 |
| H | -5.369182000 | 1.111302000  | -1.309971000 |
| H | -2.878248000 | 1.122298000  | -1.413819000 |
| C | -0.000481000 | 2.446343000  | 0.646776000  |
| C | 1.207828000  | 3.151763000  | 0.533082000  |
| C | -1.209112000 | 3.151259000  | 0.533358000  |
| C | 1.208785000  | 4.521712000  | 0.309068000  |
| C | -1.210683000 | 4.521208000  | 0.309345000  |

|   |              |             |             |
|---|--------------|-------------|-------------|
| C | -0.001103000 | 5.203153000 | 0.196488000 |
| H | 2.145320000  | 2.613312000 | 0.625334000 |
| H | -2.146362000 | 2.612425000 | 0.625838000 |
| H | 2.144511000  | 5.060619000 | 0.222124000 |
| H | -2.146650000 | 5.059731000 | 0.222619000 |
| H | -0.001346000 | 6.272778000 | 0.020690000 |

**Product Diels-Alder 1' + 4,4'-bptz at bond a**  
48

symmetry c1

|   |               |              |              |
|---|---------------|--------------|--------------|
| C | 0.732888000   | -0.522113000 | 3.208684000  |
| C | -0.732693000  | -0.522441000 | 3.208763000  |
| C | -1.442611000  | -0.451964000 | 2.075177000  |
| C | -0.782001000  | -0.219802000 | 0.769850000  |
| C | 0.781888000   | -0.219806000 | 0.769703000  |
| C | 1.442677000   | -0.451525000 | 2.075013000  |
| C | 1.233136000   | -1.086053000 | -0.442304000 |
| C | 2.724537000   | -1.176093000 | -0.586714000 |
| B | -0.000068000  | 1.075887000  | 0.483655000  |
| C | -1.233336000  | -1.085902000 | -0.442225000 |
| N | -0.616126000  | -0.490671000 | -1.646800000 |
| N | -0.614569000  | -2.419263000 | -0.226215000 |
| C | -2.724756000  | -1.175795000 | -0.586635000 |
| N | 0.615962000   | -0.490778000 | -1.646839000 |
| N | 0.614225000   | -2.419345000 | -0.226236000 |
| C | 3.425163000   | -0.161246000 | -1.232012000 |
| C | 4.811331000   | -0.246523000 | -1.289740000 |
| N | 5.515744000   | -1.245768000 | -0.758341000 |
| C | -3.445490000  | -2.226083000 | -0.029519000 |
| C | -4.832741000  | -2.210163000 | -0.146053000 |
| N | -5.515963000  | -1.245221000 | -0.758364000 |
| C | 4.832419000   | -2.210568000 | -0.145911000 |
| C | 3.445170000   | -2.226358000 | -0.029426000 |
| C | -4.811445000  | -0.245956000 | -1.289594000 |
| C | -3.425278000  | -0.160800000 | -1.231795000 |
| H | 1.245496000   | -0.651728000 | 4.154175000  |
| H | -1.245137000  | -0.652428000 | 4.154291000  |
| H | -2.522501000  | -0.554426000 | 2.079915000  |
| H | 2.522618000   | -0.553472000 | 2.079689000  |
| H | 2.901307000   | 0.666228000  | -1.694556000 |
| H | 5.384017000   | 0.527300000  | -1.791355000 |
| H | -2.939917000  | -3.039846000 | 0.473958000  |
| H | -5.421744000  | -3.018081000 | 0.276668000  |
| H | 5.421341000   | -3.018466000 | 0.276958000  |
| H | 2.939519000   | -3.040031000 | 0.474116000  |
| H | -5.384047000  | 0.527994000  | -1.791108000 |
| H | -2.901353000  | 0.666716000  | -1.694185000 |
| C | 0.000092000   | 2.568310000  | 0.233426000  |
| C | 1.209942000   | 3.273469000  | 0.114494000  |
| C | -1.209547000  | 3.273861000  | 0.114665000  |
| C | 1.211419000   | 4.641103000  | -0.120038000 |
| C | -1.2110611000 | 4.641491000  | -0.119877000 |
| C | 0.000506000   | 5.320840000  | -0.237247000 |
| H | 2.146611000   | 2.734126000  | 0.210832000  |
| H | -2.146383000  | 2.734837000  | 0.211144000  |
| H | 2.146630000   | 5.179980000  | -0.211355000 |
| H | -2.145660000  | 5.180667000  | -0.211089000 |
| H | 0.000666000   | 6.389225000  | -0.420913000 |

**TS Diels-Alder 1' + 4,4'-bptz at bond b**  
48

symmetry c1

|   |              |              |              |
|---|--------------|--------------|--------------|
| C | -2.139813000 | -1.554493000 | 1.282820000  |
| C | -1.399364000 | -1.088341000 | 0.130471000  |
| C | -0.042846000 | -0.645622000 | 0.397240000  |
| C | 0.495904000  | -0.813492000 | 1.742930000  |
| C | -0.252824000 | -1.245391000 | 2.791592000  |
| C | -1.636030000 | -1.522786000 | 2.551252000  |
| C | -2.315248000 | 0.596985000  | -0.383341000 |
| N | -1.985006000 | 1.445726000  | 0.672247000  |
| N | -0.765340000 | 1.730457000  | 0.785255000  |
| C | 0.094738000  | 1.141357000  | -0.163187000 |
| C | -3.754319000 | 0.257477000  | -0.523018000 |
| C | 1.518167000  | 1.589054000  | -0.059807000 |
| N | -1.627170000 | 0.814000000  | -1.579749000 |
| N | -0.406209000 | 1.101928000  | -1.473196000 |
| C | 2.054222000  | 1.962282000  | 1.169546000  |
| C | 3.408307000  | 2.273746000  | 1.234054000  |

|   |              |              |              |
|---|--------------|--------------|--------------|
| N | 4.230419000  | 2.233162000  | 0.186312000  |
| C | 3.699856000  | 1.891006000  | -0.987656000 |
| C | 2.359657000  | 1.567403000  | -1.167701000 |
| C | -4.232703000 | -0.345034000 | -1.683297000 |
| C | -5.577383000 | -0.695758000 | -1.741939000 |
| N | -6.441983000 | -0.491430000 | -0.749118000 |
| C | -5.971382000 | 0.089871000  | 0.354458000  |
| C | -4.647284000 | 0.478460000  | 0.522967000  |
| B | 1.443273000  | -1.050879000 | 0.628319000  |
| H | -3.142044000 | -1.935057000 | 1.118682000  |
| H | -1.654538000 | -1.542615000 | -0.822809000 |
| H | 0.187530000  | -1.523969000 | 3.743557000  |
| H | -2.254725000 | -1.871187000 | 3.370271000  |
| H | 1.431196000  | 2.001637000  | 2.053827000  |
| H | 3.853422000  | 2.565696000  | 2.180267000  |
| H | 4.382135000  | 1.865059000  | -1.831556000 |
| H | 1.982395000  | 1.285097000  | -2.141544000 |
| H | -3.576376000 | -0.520676000 | -2.526333000 |
| H | -5.978112000 | -1.164602000 | -2.635197000 |
| H | -6.690984000 | 0.254528000  | 1.150351000  |
| H | -4.315311000 | 0.948975000  | 1.439384000  |
| C | 2.785189000  | -1.402181000 | 0.001847000  |
| C | 2.867957000  | -1.769346000 | -1.350860000 |
| C | 3.970118000  | -1.255243000 | 0.736718000  |
| C | 4.099457000  | -1.990814000 | -1.949390000 |
| C | 5.205689000  | -1.454047000 | 0.133227000  |
| C | 5.268006000  | -1.824109000 | -1.207037000 |
| H | 1.956216000  | -1.862625000 | -1.932225000 |
| H | 3.916055000  | -0.957347000 | 1.778348000  |
| H | 4.156012000  | -2.277276000 | -2.992775000 |
| H | 6.117594000  | -1.314441000 | 0.700802000  |
| H | 6.231760000  | -1.979608000 | -1.678206000 |

**Product Diels-Alder 1' + 4,4'-bptz at bond b**

48

symmetry c1

|   |              |              |              |
|---|--------------|--------------|--------------|
| C | 1.972716000  | 0.048748000  | 2.107053000  |
| C | 1.352444000  | 0.455058000  | 0.788782000  |
| C | -0.078399000 | -0.040386000 | 0.657847000  |
| C | -0.816181000 | -0.344848000 | 1.926991000  |
| C | -0.197143000 | -0.405102000 | 3.115291000  |
| C | 1.266011000  | -0.409251000 | 3.150126000  |
| C | 2.145525000  | -0.214395000 | -0.412852000 |
| N | 2.029518000  | -1.664416000 | -0.218830000 |
| N | 0.875514000  | -2.091947000 | -0.261343000 |
| C | -0.149849000 | -1.065445000 | -0.524759000 |
| C | 3.579174000  | 0.229730000  | -0.496128000 |
| C | -1.502180000 | -1.694445000 | -0.716968000 |
| N | 1.406614000  | 0.170148000  | -1.634053000 |
| N | 0.260590000  | -0.273401000 | -1.698254000 |
| C | -1.874393000 | -2.801629000 | 0.039985000  |
| C | -3.159891000 | -3.307281000 | -0.112634000 |
| N | -4.066872000 | -2.791256000 | -0.942484000 |
| C | -3.697221000 | -1.734703000 | -1.663045000 |
| C | -2.436412000 | -1.149444000 | -1.591212000 |
| C | 3.891962000  | 1.473813000  | -1.036185000 |
| C | 5.222232000  | 1.876838000  | -1.053142000 |
| N | 6.225951000  | 1.139118000  | -0.579475000 |
| C | 5.914694000  | -0.051267000 | -0.070448000 |
| C | 4.617950000  | -0.552773000 | -0.002724000 |
| B | -1.497103000 | 0.590689000  | 1.000728000  |
| H | 3.049585000  | 0.157659000  | 2.194022000  |
| H | 1.477072000  | 1.532899000  | 0.632487000  |
| H | -0.741792000 | -0.310040000 | 4.050101000  |
| H | 1.774786000  | -0.657573000 | 4.074343000  |
| H | -1.176814000 | -3.259902000 | 0.729319000  |
| H | -3.476649000 | -4.170391000 | 0.464286000  |
| H | -4.445846000 | -1.327819000 | -2.335626000 |
| H | -2.191410000 | -0.291174000 | -2.202832000 |
| H | 3.119505000  | 2.108389000  | -1.453101000 |
| H | 5.493600000  | 2.840976000  | -1.471473000 |
| H | 6.744533000  | -0.642048000 | 0.304771000  |
| H | 4.423220000  | -1.532913000 | 0.412717000  |
| C | -2.596552000 | 1.533860000  | 0.538525000  |
| C | -2.401840000 | 2.328336000  | -0.603270000 |
| C | -3.827658000 | 1.604755000  | 1.208974000  |
| C | -3.404228000 | 3.173851000  | -1.058120000 |
| C | -4.834057000 | 2.445103000  | 0.752556000  |

|   |              |             |              |
|---|--------------|-------------|--------------|
| C | -4.619746000 | 3.229017000 | -0.379032000 |
| H | -1.458238000 | 2.265030000 | -1.136931000 |
| H | -3.990325000 | 0.987718000 | 2.085735000  |
| H | -3.246755000 | 3.783793000 | -1.939491000 |
| H | -5.784107000 | 2.490612000 | 1.271082000  |
| H | -5.405807000 | 3.884773000 | -0.735631000 |

**TS Diels-Alder 1' + 4,4'-bptz at bond c**  
48

|             |              |              |              |
|-------------|--------------|--------------|--------------|
| symmetry c1 |              |              |              |
| C           | -1.830449000 | -1.838807000 | -0.858719000 |
| C           | -1.663601000 | -0.431146000 | -1.227258000 |
| C           | -0.352602000 | 0.162393000  | -1.230912000 |
| C           | 0.717366000  | -0.738466000 | -0.865914000 |
| C           | 0.503349000  | -2.024260000 | -0.448823000 |
| C           | -0.805495000 | -2.619791000 | -0.446210000 |
| C           | -2.639520000 | 0.555181000  | 0.278407000  |
| N           | -1.844431000 | 0.185393000  | 1.358673000  |
| N           | -0.670208000 | 0.639707000  | 1.363917000  |
| C           | -0.321100000 | 1.450129000  | 0.281554000  |
| C           | -4.020135000 | 0.009220000  | 0.255672000  |
| C           | 1.065425000  | 1.990375000  | 0.297256000  |
| N           | -2.486915000 | 1.853747000  | -0.187572000 |
| N           | -1.310488000 | 2.317441000  | -0.176405000 |
| B           | 1.902910000  | -1.524988000 | -0.475288000 |
| C           | 1.463117000  | 2.938559000  | -0.641389000 |
| C           | 2.780046000  | 3.382861000  | -0.615376000 |
| N           | 3.690007000  | 2.955782000  | 0.260831000  |
| C           | 3.292344000  | 2.055367000  | 1.158837000  |
| C           | 2.002866000  | 1.537498000  | 1.219834000  |
| C           | -4.394140000 | -1.032186000 | 1.101371000  |
| C           | -5.689856000 | -1.527697000 | 1.004290000  |
| N           | -6.598813000 | -1.069454000 | 0.144278000  |
| C           | -6.228292000 | -0.071172000 | -0.656762000 |
| C           | -4.961234000 | 0.501512000  | -0.644689000 |
| C           | 3.418141000  | -1.628938000 | -0.259432000 |
| C           | 4.010268000  | -2.763162000 | 0.312407000  |
| C           | 5.382997000  | -2.819081000 | 0.521723000  |
| C           | 6.183691000  | -1.738390000 | 0.159711000  |
| C           | 5.614449000  | -0.603844000 | -0.413542000 |
| C           | 4.241885000  | -0.553529000 | -0.621720000 |
| H           | -2.832564000 | -2.246339000 | -0.934378000 |
| H           | -2.389110000 | -0.046584000 | -1.936147000 |
| H           | -0.152760000 | 0.946749000  | -1.953151000 |
| H           | -0.968934000 | -3.658956000 | -0.187571000 |
| H           | 0.760624000  | 3.332168000  | -1.365828000 |
| H           | 3.119126000  | 4.120651000  | -1.335723000 |
| H           | 4.046358000  | 1.713785000  | 1.860860000  |
| H           | 1.735539000  | 0.799351000  | 1.964382000  |
| H           | -3.693318000 | -1.437566000 | 1.819641000  |
| H           | -6.011806000 | -2.336193000 | 1.653022000  |
| H           | -6.983154000 | 0.293659000  | -1.346052000 |
| H           | -4.716840000 | 1.322133000  | -1.307577000 |
| H           | 3.385559000  | -3.603259000 | 0.596462000  |
| H           | 5.830500000  | -3.699798000 | 0.966977000  |
| H           | 7.254086000  | -1.780512000 | 0.325803000  |
| H           | 6.236323000  | 0.239337000  | -0.690392000 |
| H           | 3.794650000  | 0.332238000  | -1.061851000 |

**Product Diels-Alder 1' + 4,4'-bptz at bond c**  
48

|             |              |              |              |
|-------------|--------------|--------------|--------------|
| symmetry c1 |              |              |              |
| C           | -1.803746000 | -1.913172000 | -0.756955000 |
| C           | -1.722322000 | -0.421003000 | -1.012617000 |
| C           | -0.311795000 | 0.215702000  | -1.013046000 |
| C           | 0.757322000  | -0.774077000 | -0.736786000 |
| C           | 0.562351000  | -2.094264000 | -0.503307000 |
| C           | -0.756918000 | -2.712056000 | -0.522048000 |
| C           | -2.562743000 | 0.371882000  | 0.068340000  |
| N           | -1.838542000 | 0.213069000  | 1.338545000  |
| N           | -0.707400000 | 0.697063000  | 1.347176000  |
| C           | -0.305413000 | 1.343820000  | 0.087010000  |
| C           | -3.990761000 | -0.084715000 | 0.176710000  |
| C           | 1.027174000  | 2.026766000  | 0.209363000  |
| N           | -2.495824000 | 1.786828000  | -0.352208000 |
| N           | -1.366895000 | 2.275763000  | -0.336700000 |
| B           | 1.952753000  | -1.579151000 | -0.446417000 |
| C           | 1.412407000  | 2.979031000  | -0.729303000 |

|   |              |              |              |
|---|--------------|--------------|--------------|
| C | 2.684588000  | 3.531315000  | -0.630391000 |
| N | 3.563012000  | 3.203719000  | 0.317480000  |
| C | 3.176700000  | 2.299100000  | 1.215559000  |
| C | 1.930509000  | 1.679635000  | 1.207146000  |
| C | -4.396459000 | -0.977959000 | 1.162747000  |
| C | -5.722567000 | -1.400333000 | 1.166775000  |
| N | -6.631955000 | -1.003151000 | 0.278603000  |
| C | -6.230922000 | -0.144694000 | -0.657995000 |
| C | -4.932238000 | 0.343072000  | -0.754405000 |
| C | 3.470815000  | -1.675083000 | -0.232828000 |
| C | 4.090613000  | -2.856113000 | 0.196179000  |
| C | 5.464236000  | -2.904275000 | 0.402394000  |
| C | 6.238904000  | -1.768381000 | 0.180063000  |
| C | 5.642086000  | -0.586250000 | -0.250557000 |
| C | 4.268397000  | -0.543347000 | -0.455586000 |
| H | -2.806210000 | -2.328282000 | -0.791219000 |
| H | -2.230749000 | -0.218647000 | -1.959513000 |
| H | -0.111124000 | 0.729656000  | -1.955706000 |
| H | -0.893678000 | -3.774686000 | -0.364242000 |
| H | 0.735326000  | 3.295485000  | -1.513521000 |
| H | 3.012185000  | 4.274974000  | -1.350010000 |
| H | 3.904185000  | 2.040412000  | 1.978472000  |
| H | 1.675845000  | 0.942328000  | 1.956692000  |
| H | -3.700317000 | -1.329431000 | 1.912960000  |
| H | -6.067945000 | -2.094849000 | 1.926094000  |
| H | -6.986099000 | 0.174417000  | -1.369317000 |
| H | -4.668286000 | 1.055484000  | -1.526263000 |
| H | 3.487234000  | -3.740512000 | 0.370842000  |
| H | 5.932654000  | -3.822622000 | 0.736270000  |
| H | 7.309992000  | -1.805102000 | 0.342798000  |
| H | 6.244052000  | 0.298362000  | -0.422612000 |
| H | 3.801098000  | 0.378107000  | -0.788700000 |

**TS Diels-Alder 1' + 4,4'-bptz at bond d**  
48

|             |              |              |              |
|-------------|--------------|--------------|--------------|
| symmetry c1 |              |              |              |
| N           | -1.193060000 | 0.626199000  | 1.296110000  |
| N           | -1.193239000 | -0.625941000 | 1.296127000  |
| C           | -1.951213000 | -1.237020000 | 0.280102000  |
| C           | -0.989835000 | -0.738075000 | -1.302962000 |
| C           | -0.989645000 | 0.738307000  | -1.302969000 |
| C           | -1.950864000 | 1.237472000  | 0.280064000  |
| C           | 0.278846000  | -1.447616000 | -1.202895000 |
| C           | 1.372414000  | -0.725743000 | -0.868552000 |
| C           | 1.372609000  | 0.725357000  | -0.868583000 |
| C           | 0.279231000  | 1.447511000  | -1.202938000 |
| B           | 2.665009000  | -0.000360000 | -0.624173000 |
| C           | 4.143188000  | -0.000512000 | -0.250282000 |
| C           | 4.838191000  | 1.206788000  | -0.078365000 |
| C           | 6.186069000  | 1.208519000  | 0.254313000  |
| C           | 6.857613000  | -0.000749000 | 0.420033000  |
| C           | 6.185837000  | -1.209899000 | 0.254388000  |
| C           | 4.837960000  | -1.207934000 | -0.078291000 |
| C           | -1.975931000 | 2.726805000  | 0.3111616000 |
| C           | -1.976703000 | -2.726342000 | 0.3111638000 |
| C           | -2.928891000 | 3.433622000  | -0.415633000 |
| C           | -2.880589000 | 4.823491000  | -0.394792000 |
| N           | -1.971366000 | 5.523942000  | 0.281535000  |
| C           | -1.067324000 | 4.833829000  | 0.976421000  |
| C           | -1.020194000 | 3.444925000  | 1.024835000  |
| C           | -1.021186000 | -3.444753000 | 1.024855000  |
| C           | -1.068719000 | -4.833641000 | 0.976408000  |
| N           | -1.972948000 | -5.523476000 | 0.281488000  |
| C           | -2.881955000 | -4.822748000 | -0.394840000 |
| C           | -2.929855000 | -3.432864000 | -0.415648000 |
| N           | -3.184970000 | 0.630390000  | 0.019977000  |
| N           | -3.185141000 | -0.629595000 | 0.019998000  |
| H           | -1.720698000 | -1.198793000 | -1.961230000 |
| H           | -1.720399000 | 1.199190000  | -1.961237000 |
| H           | 0.291886000  | -2.513824000 | -1.402084000 |
| H           | 0.292555000  | 2.513708000  | -1.402166000 |
| H           | 4.308693000  | 2.144332000  | -0.208671000 |
| H           | 6.715188000  | 2.144792000  | 0.385096000  |
| H           | 7.910027000  | -0.000843000 | 0.679884000  |
| H           | 6.714779000  | -2.146264000 | 0.385231000  |
| H           | 4.308285000  | -2.145387000 | -0.208539000 |
| H           | -3.699986000 | 2.913844000  | -0.970247000 |
| H           | -3.612656000 | 5.401017000  | -0.950444000 |

|   |              |              |              |
|---|--------------|--------------|--------------|
| H | -0.337937000 | 5.420894000  | 1.525569000  |
| H | -0.264360000 | 2.932054000  | 1.605354000  |
| H | -0.265218000 | -2.932108000 | 1.605401000  |
| H | -0.339514000 | -5.420932000 | 1.525557000  |
| H | -3.614179000 | -5.400050000 | -0.950519000 |
| H | -3.700785000 | -2.912844000 | -0.970267000 |

**Product Diels-Alder 1' + 4,4'-bptz at bond d**  
48

symmetry c1

|   |              |              |              |
|---|--------------|--------------|--------------|
| N | 1.240937000  | -0.615166000 | 1.285794000  |
| N | 1.241110000  | 0.614952000  | 1.285794000  |
| C | 1.867476000  | 1.225464000  | 0.104046000  |
| C | 0.984781000  | 0.775955000  | -1.142267000 |
| C | 0.984596000  | -0.776116000 | -1.142279000 |
| C | 1.867146000  | -1.225854000 | 0.104053000  |
| C | -0.362258000 | 1.464354000  | -1.092532000 |
| C | -1.453251000 | 0.741404000  | -0.850007000 |
| C | -1.453436000 | -0.741076000 | -0.850056000 |
| C | -0.362580000 | -1.464223000 | -1.092599000 |
| B | -2.751353000 | 0.000326000  | -0.663823000 |
| C | -4.223252000 | 0.000459000  | -0.272723000 |
| C | -4.916413000 | -1.207487000 | -0.095054000 |
| C | -6.261291000 | -1.209046000 | 0.248723000  |
| C | -6.930961000 | 0.000685000  | 0.419879000  |
| C | -6.261059000 | 1.210306000  | 0.248832000  |
| C | -4.916182000 | 1.208523000  | -0.094944000 |
| C | 1.977351000  | -2.718634000 | 0.237990000  |
| C | 1.978074000  | 2.718217000  | 0.237970000  |
| C | 2.906834000  | -3.424519000 | -0.519113000 |
| C | 2.935803000  | -4.810901000 | -0.410849000 |
| N | 2.122135000  | -5.509508000 | 0.379276000  |
| C | 1.239609000  | -4.820837000 | 1.101484000  |
| C | 1.121998000  | -3.434879000 | 1.068886000  |
| C | 1.122865000  | 3.434695000  | 1.068817000  |
| C | 1.240843000  | 4.820622000  | 1.101413000  |
| N | 2.123591000  | 5.509054000  | 0.379249000  |
| C | 2.937115000  | 4.810225000  | -0.410828000 |
| C | 2.907783000  | 3.423850000  | -0.519088000 |
| N | 3.185763000  | -0.616304000 | -0.116648000 |
| N | 3.185930000  | 0.615553000  | -0.116657000 |
| H | 1.538176000  | 1.154906000  | -2.005564000 |
| H | 1.537939000  | -1.155180000 | -2.005556000 |
| H | -0.371560000 | 2.532059000  | -1.290343000 |
| H | -0.372089000 | -2.531915000 | -1.290461000 |
| H | -4.387144000 | -2.144463000 | -0.230171000 |
| H | -6.789780000 | -2.145019000 | 0.383917000  |
| H | -7.981287000 | 0.000774000  | 0.688157000  |
| H | -6.789371000 | 2.146366000  | 0.384112000  |
| H | -4.386736000 | 2.145412000  | -0.229973000 |
| H | 3.606122000  | -2.908061000 | -1.164712000 |
| H | 3.652743000  | -5.386447000 | -0.987890000 |
| H | 0.587928000  | -5.405539000 | 1.743122000  |
| H | 0.387410000  | -2.925660000 | 1.678939000  |
| H | 0.388110000  | 2.925677000  | 1.678838000  |
| H | 0.589283000  | 5.405501000  | 1.743013000  |
| H | 3.654241000  | 5.385576000  | -0.987833000 |
| H | 3.606969000  | 2.907203000  | -1.164646000 |

**TS Diels-Alder 1' + 4,4'-bptz at bond C-B**  
48

symmetry c1

|   |              |              |              |
|---|--------------|--------------|--------------|
| C | -2.429760000 | 2.798967000  | -0.709180000 |
| C | -1.756761000 | 2.999560000  | -1.930915000 |
| C | -0.678258000 | 2.212018000  | -2.295252000 |
| C | -0.298262000 | 1.200047000  | -1.420556000 |
| C | -1.048720000 | 0.883495000  | -0.240138000 |
| C | -2.108687000 | 1.747336000  | 0.122032000  |
| B | 0.543008000  | 0.684061000  | -0.313138000 |
| N | -1.380278000 | -1.612408000 | -1.038432000 |
| C | -1.749377000 | -1.007350000 | 0.159916000  |
| N | -0.137080000 | -1.762208000 | -1.205456000 |
| C | 0.687780000  | -1.354757000 | -0.172649000 |
| N | 0.212416000  | -1.535858000 | 1.118413000  |
| N | -1.028713000 | -1.379921000 | 1.291657000  |
| C | 2.146387000  | -1.551199000 | -0.393286000 |
| C | 3.031344000  | -1.651013000 | 0.676134000  |
| C | 4.389942000  | -1.739089000 | 0.399491000  |

|   |              |              |              |
|---|--------------|--------------|--------------|
| N | 4.901250000  | -1.737135000 | -0.832280000 |
| C | 4.040079000  | -1.656877000 | -1.845516000 |
| C | 2.662319000  | -1.560100000 | -1.685498000 |
| C | -3.217691000 | -0.857890000 | 0.351347000  |
| C | -4.052879000 | -0.685615000 | -0.749164000 |
| C | -5.414783000 | -0.533427000 | -0.525531000 |
| N | -5.973201000 | -0.540282000 | 0.6866418000 |
| C | -5.163324000 | -0.714653000 | 1.728539000  |
| C | -3.784736000 | -0.877632000 | 1.621292000  |
| C | 1.784434000  | 1.227590000  | 0.452487000  |
| C | 2.928900000  | 1.643722000  | -0.236069000 |
| C | 4.063404000  | 2.057848000  | 0.452130000  |
| C | 4.061098000  | 2.078163000  | 1.844299000  |
| C | 2.921783000  | 1.690159000  | 2.544193000  |
| C | 1.794720000  | 1.261651000  | 1.851434000  |
| H | -3.230863000 | 3.473259000  | -0.430824000 |
| H | -2.056901000 | 3.825860000  | -2.565593000 |
| H | -0.113494000 | 2.424057000  | -3.195745000 |
| H | -2.708223000 | 1.561385000  | 1.006183000  |
| H | 2.671425000  | -1.636973000 | 1.696190000  |
| H | 5.104879000  | -1.805872000 | 1.213329000  |
| H | 4.471827000  | -1.663746000 | -2.841606000 |
| H | 2.005717000  | -1.485467000 | -2.543165000 |
| H | -3.645911000 | -0.669019000 | -1.752535000 |
| H | -6.092501000 | -0.396602000 | -1.362054000 |
| H | -5.636516000 | -0.725172000 | 2.705357000  |
| H | -3.169555000 | -1.023694000 | 2.499287000  |
| H | 2.938182000  | 1.615459000  | -1.321142000 |
| H | 4.950624000  | 2.356213000  | -0.093822000 |
| H | 4.946228000  | 2.396130000  | 2.382917000  |
| H | 2.916999000  | 1.711300000  | 3.627825000  |
| H | 0.918566000  | 0.931540000  | 2.401614000  |

**Product Diels-Alder 1' + 4,4'-bptz at bond C-B**

48

symmetry c1

|   |              |              |              |
|---|--------------|--------------|--------------|
| C | -2.477032000 | 3.341560000  | 0.750442000  |
| C | -1.177753000 | 3.812072000  | 0.894818000  |
| C | -0.116751000 | 2.938909000  | 0.708447000  |
| C | -0.317428000 | 1.584893000  | 0.386537000  |
| C | -1.648227000 | 1.122797000  | 0.267538000  |
| C | -2.712477000 | 2.006457000  | 0.440989000  |
| B | 0.917170000  | 0.667759000  | 0.208228000  |
| N | -1.228222000 | -0.809064000 | -1.249874000 |
| C | -1.931137000 | -0.343193000 | -0.013393000 |
| N | -0.038448000 | -1.064567000 | -1.188947000 |
| C | 0.662080000  | -0.919114000 | 0.133462000  |
| N | -0.233002000 | -1.382377000 | 1.210487000  |
| N | -1.427432000 | -1.142093000 | 1.148844000  |
| C | 1.898647000  | -1.787122000 | 0.105698000  |
| C | 2.320839000  | -2.499672000 | 1.223550000  |
| C | 3.513779000  | -3.213492000 | 1.145620000  |
| N | 4.282424000  | -3.264251000 | 0.060056000  |
| C | 3.859051000  | -2.588507000 | -1.008713000 |
| C | 2.688461000  | -1.841544000 | -1.039333000 |
| C | -3.401554000 | -0.664335000 | -0.194732000 |
| C | -4.001579000 | -0.544216000 | -1.444497000 |
| C | -5.364594000 | -0.797331000 | -1.554938000 |
| N | -6.139653000 | -1.151348000 | -0.530452000 |
| C | -5.552506000 | -1.266181000 | 0.659202000  |
| C | -4.198324000 | -1.035280000 | 0.883292000  |
| C | 2.339911000  | 1.252363000  | -0.031509000 |
| C | 2.508216000  | 2.241191000  | -1.015088000 |
| C | 3.764411000  | 2.760818000  | -1.307505000 |
| C | 4.875852000  | 2.330664000  | -0.590536000 |
| C | 4.729283000  | 1.369472000  | 0.405979000  |
| C | 3.479596000  | 0.822826000  | 0.667181000  |
| H | -3.318425000 | 4.011365000  | 0.884148000  |
| H | -0.994638000 | 4.848874000  | 1.149268000  |
| H | 0.897750000  | 3.301311000  | 0.825688000  |
| H | -3.732988000 | 1.662315000  | 0.340832000  |
| H | 1.739230000  | -2.500884000 | 2.135428000  |
| H | 3.865364000  | -3.773259000 | 2.006980000  |
| H | 4.492185000  | -2.640478000 | -1.888800000 |
| H | 2.404017000  | -1.305427000 | -1.935906000 |
| H | -3.421442000 | -0.267236000 | -2.314732000 |
| H | -5.856223000 | -0.711009000 | -2.518815000 |
| H | -6.195583000 | -1.558243000 | 1.483508000  |



|   |              |              |              |
|---|--------------|--------------|--------------|
| H | -3.777293000 | -1.146924000 | 1.873132000  |
| H | 1.645025000  | 2.595973000  | -1.569400000 |
| H | 3.873904000  | 3.505995000  | -2.086532000 |
| H | 5.854748000  | 2.741919000  | -0.807716000 |
| H | 5.592461000  | 1.033223000  | 0.967890000  |
| H | 3.391803000  | 0.055387000  | 1.428028000  |

## 8. References

1. R. K. Harris, E. D. Becker, S. M. Cabral de Menezes, R. Goodfellow and P. Granger, *Pure Appl. Chem.*, 2001, **73**, 1795-1818.
2. M. Sindlinger, M. Ströbele, C. Maichle-Mössmer and H. F. Bettinger, *Chem. Commun.*, 2022, **58**, 2818-2821.
3. G. M. Sheldrick, SHELXS-97, Program for Crystal Structure Solution, 1997.
4. G. Sheldrick, *Acta Cryst.*, 2015, **A71**, 3-8.
5. O. V. Dolomanov, L. J. Bourhis, R. J. Gildea, J. A. K. Howard and H. Puschmann, *J. Appl. Crystallogr.*, 2009, **42**, 339-341.
6. S. Grimme, A. Hansen, S. Ehlert and J.-M. Mewes, *J. Chem. Phys.*, 2021, **154**, 064103.
7. J. W. Furness, A. D. Kaplan, J. Ning, J. P. Perdew and J. Sun, *J. Phys. Chem. Lett.*, 2020, **11**, 8208-8215.
8. C. Bannwarth, S. Ehlert and S. Grimme, *J. Chem. Theory Comput.*, 2019, **15**, 1652-1671.
9. V. Ásgeirsson, B. O. Birgisson, R. Bjornsson, U. Becker, F. Neese, C. Riplinger and H. Jónsson, *J. Chem. Theory Comput.*, 2021, **17**, 4929-4945.
10. F. Neese, *WIREs Comput. Mol. Sci.*, 2012, **2**, 73-78.
11. F. Neese, *WIREs Comput. Mol. Sci.*, 2018, **8**, e1327.
12. Y. Zhao and D. Truhlar, *Theor. Chem. Acc.*, 2008, **120**, 215-241.
13. R. Krishnan, J. S. Binkley, R. Seeger and J. A. Pople, *J. Chem. Phys.*, 1980, **72**, 650-654.
14. M. J. Frisch, G. W. Trucks, H. B. Schlegel, G. E. Scuseria, M. A. Robb, J. R. Cheeseman, G. Scalmani, V. Barone, G. A. Petersson, H. Nakatsuji, X. Li, M. Caricato, A. V. Marenich, J. Bloino, B. G. Janesko, R. Gomperts, B. Mennucci, H. P. Hratchian, J. V. Ortiz, A. F. Izmaylov, J. L. Sonnenberg, Williams, F. Ding, F. Lipparini, F. Egidi, J. Goings, B. Peng, A. Petrone, T. Henderson, D. Ranasinghe, V. G. Zakrzewski, J. Gao, N. Rega, G. Zheng, W. Liang, M. Hada, M. Ehara, K. Toyota, R. Fukuda, J. Hasegawa, M. Ishida, T. Nakajima, Y. Honda, O. Kitao, H. Nakai, T. Vreven, K. Throssell, J. A. Montgomery Jr., J. E. Peralta, F. Ogliaro, M. J. Bearpark, J. J. Heyd, E. N. Brothers, K. N. Kudin, V. N. Staroverov, T. A. Keith, R. Kobayashi, J. Normand, K. Raghavachari, A. P. Rendell, J. C. Burant, S. S. Iyengar, J. Tomasi, M. Cossi, J. M. Millam, M. Klene, C. Adamo, R. Cammi, J. W. Ochterski, R. L. Martin, K. Morokuma, O. Farkas, J. B. Foresman and D. J. Fox, Gaussian 16 Rev. C.01, Wallingford, CT, 2016.
15. G. Santra, N. Sylvetsky and J. M. L. Martin, *J. Phys. Chem. A*, 2019, **123**, 5129-5143.
16. F. Weigend and R. Ahlrichs, *Phys. Chem. Chem. Phys.*, 2005, **7**, 3297-3305.
17. C. Hättig, *Phys. Chem. Chem. Phys.*, 2005, **7**, 59.
18. F. Weigend, *J. Comput. Chem.*, 2008, **29**, 167-175.
19. V. Barone and M. Cossi, *J. Phys. Chem. A*, 1998, **102**, 1995-2001.
20. S. Grimme, *Chem. Eur. J.*, 2012, **18**, 9955-9964.
21. A. V. Marenich, C. J. Cramer and D. G. Truhlar, *J. Phys. Chem. B*, 2009, **113**, 6378-6396.
